# Supplementary material for: Substituted anilides from chitin-based 3-acetamido-furfural
Source: Royal Society of Chemistry journal article supplement (doi:10.1039/d3ob01461d), 2023-01-01

## Substituted anilides from chitin-based 3-acetamido-furfural

Cornelis H. M. van der Loo<sup>a</sup>, J. P. Kaniraj<sup>a</sup>, Ting Wang<sup>d</sup>, J.O.P. Broekman<sup>d</sup>, Mark L. G. Borst<sup>b</sup>, Kees Pouwer<sup>b</sup>, André Heeres<sup>c</sup>, Peter J. Deuss<sup>d</sup> and Adriaan J. Minnaard<sup>a,\*</sup>

- a) Department of Chemical Biology, Stratingh Institute for Chemistry, University of Groningen, Groningen, The Netherlands. E-mail: A.J.Minnaard@RUG.nl  
b) Symeres B.V., Kadijk 3, 9747 AT Groningen, The Netherlands.  
c) Hanze University of Applied Sciences, Zernikeplein 7, 9747 AS Groningen, The Netherlands.  
d) Department of Chemical Engineering (ENTEG), University of Groningen, Nijenborgh 4, 9747 AG Groningen, The Netherlands.

|                                                                 |           |
|-----------------------------------------------------------------|-----------|
| <b>MATERIAL AND METHODS</b> .....                               | <b>3</b>  |
| S1. REAGENTS .....                                              | 3         |
| S2. EQUIPMENT .....                                             | 3         |
| <b>SUPPLEMENTAL RESEARCH DATA</b> .....                         | <b>4</b>  |
| S3. REACTION OPTIMIZATION OF 1 WITH ETHYL ACRYLATE TO 7 .....   | 4         |
| S4. STABILITY MONITORING 1 AND 12 UNDER PROCEDURE A AND B ..... | 4         |
| S5. <sup>1</sup> H-NMR COMPARISON OF 1 AND 12 .....             | 5         |
| S6. 1,4-ADDITION SIDE PRODUCTS .....                            | 5         |
| <b>EXPERIMENTAL PROCEDURES</b> .....                            | <b>6</b>  |
| S7. SYNTHESIS OF 3A5F .....                                     | 6         |
| S8. SYNTHESIS OF 1 .....                                        | 6         |
| S9. SYNTHESIS OF 2 .....                                        | 6         |
| S10. SYNTHESIS OF 7 .....                                       | 6         |
| S11. SYNTHESIS OF 12 .....                                      | 7         |
| S12. PROTOCOL A .....                                           | 7         |
| S13. PROTOCOL B .....                                           | 7         |
| S14. SYNTHESIS OF 13 .....                                      | 7         |
| S15. SYNTHESIS OF 14 .....                                      | 7         |
| S16. SYNTHESIS OF 15 .....                                      | 8         |
| S17. SYNTHESIS OF 16 .....                                      | 8         |
| S18. SYNTHESIS OF 17 .....                                      | 8         |
| S19. SYNTHESIS OF 18 .....                                      | 8         |
| S20. SYNTHESIS OF 19 .....                                      | 8         |
| S21. SYNTHESIS OF 20 .....                                      | 9         |
| S22. SYNTHESIS OF 21 .....                                      | 9         |
| S23. SYNTHESIS OF 22 .....                                      | 9         |
| S24. SYNTHESIS OF 25 .....                                      | 9         |
| S25. SYNTHESIS OF 26 .....                                      | 9         |
| S26. SYNTHESIS OF 27 .....                                      | 10        |
| S27. SYNTHESIS OF 32 .....                                      | 10        |
| S28. SYNTHESIS OF 33 .....                                      | 11        |
| <b>CHARACTERIZATION</b> .....                                   | <b>12</b> |

|      |                       |    |
|------|-----------------------|----|
| S29. | SPECTRA OF 3A5F ..... | 12 |
| S30. | SPECTRA OF 1 .....    | 14 |
| S31. | SPECTRA OF 2 .....    | 16 |
| S32. | SPECTRA OF 7 .....    | 18 |
| S33. | SPECTRA OF 12 .....   | 20 |
| S34. | SPECTRA OF 13 .....   | 22 |
| S35. | SPECTRA OF 14 .....   | 24 |
| S36. | SPECTRA OF 15 .....   | 26 |
| S37. | SPECTRA OF 16 .....   | 28 |
| S38. | SPECTRA OF 17 .....   | 30 |
| S39. | SPECTRA OF 18 .....   | 32 |
| S40. | SPECTRA OF 19 .....   | 34 |
| S41. | SPECTRA OF 20 .....   | 36 |
| S42. | SPECTRA OF 21 .....   | 38 |
| S43. | SPECTRA OF 22 .....   | 40 |
| S44. | SPECTRA OF 25 .....   | 42 |
| S45. | SPECTRA OF 26 .....   | 44 |
| S46. | SPECTRA OF 27 .....   | 46 |
| S47. | SPECTRA OF 32 .....   | 48 |
| S48. | SPECTRA OF 33 .....   | 50 |

# Material and methods

## S1. Reagents

(R)-*N*-(5-(1,2-dihydroxyethyl)furan-3-yl)acetamide (**Di-HAF**) and *N*-(5-acetylfuran-3-yl)acetamide (**3A5AF**) were prepared according to reference [1] and pyrrolidin-1-amine according to [2]. All other reagents were acquired from commercial sources and used without further purification. Specifically, 1,1-dimethylhydrazine was purchased from SigmaAldrich. Sodium periodate (99.8+%, ACS reagent), 3-chloroperoxybenzoic acid (70-75%), ethyl acrylate (99.5%, stabilized), *tert*-butyl acrylate (99%, stabilized), acrylonitrile (99+%), dimethyl maleate (96%), dimethyl fumarate (99%), diethyl vinylphosphonate (97%) and methyl vinyl ketone (95%, stabilized) from ThermoFisher Scientific Chemicals. Fumaronitrile and (methylsulfonyl)ethene from Combi-Blocks, Inc., 1-methyl-1H-pyrrole-2,5-dione and 1-benzyl-1H-pyrrole-2,5-dione from Ambeed, Inc. and 1-phenyl-1H-pyrrole-2,5-dione from TCI Europe. Thin-layer chromatography (TLC) was carried out on Merck silica gel 60 F254 aluminum plates. Visualization of compounds by TLC was done by potassium permanganate stain. Automated flash column chromatography cartridges were acquired from Screening Devices (UltraPure Irregular Silica Gel, 40 – 63  $\mu$ m, 60A, 5/1P). As internal standard for quantitative analysis was used ethylene carbonate, standard for quantitative NMR, TraceCERT® (SigmaAldrich).

[1] *Org. Biomol. Chem.*, 2021, **19**, 10105–10111.

[2] *Syn. Com.*, 2015, **45**, 1367-1373.

## S2. Equipment

<sup>1</sup>H-NMR and <sup>13</sup>C-NMR analyses were performed on a Bruker Avance NEO (400 MHz) at 25 °C. High-resolution mass spectrometry (HRMS) was performed on a Thermo Scientific LTQ Orbitrap XL (FTMS). DSC was recorded on a TA instruments DSC Q20 and Infrared spectra (IR) spectra were recorded on a PerkinElmer Spectrum Two FT-IR Spectrometer. Automated flash column chromatography was carried out on a Buchi Sepacore® Flash System X10 (Pumps: 601, control unit: 620, detector: 640, fraction collector: 660). Ozonolysis was performed using an ozone generator from Ozone Tech Systems (Model: OT-20, Typ. no: 32000-03).

## Supplemental Research data

### S3. Reaction optimization of **1** with ethyl acrylate to **7**

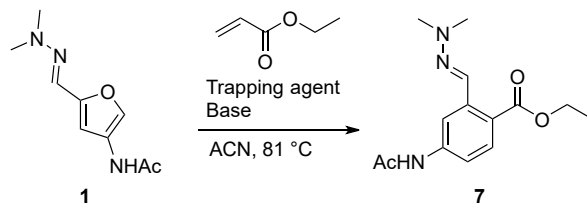

**Scheme 1.** Reaction optimization of **1** with ethyl acrylate to **7**.

**Table 1.** Reaction optimization of **1** and ethyl acrylate. Parameters studied: trapping agent (type/eq.), type of base, concentration, and equivalents of dienophile.

| #  | DIENOPHILE                   | TRAPPING AGENT                | BASE                          | CONCENTRATION | YIELD*     |
|----|------------------------------|-------------------------------|-------------------------------|---------------|------------|
| 1  | Ethyl acrylate (2 eq)        | Ac <sub>2</sub> O (1 eq)      | triethylamine (2.5 eq)        | 0.5M          | 55%        |
| 2  | Ethyl acrylate (2 eq)        | Ac <sub>2</sub> O (2 eq)      | triethylamine (2.5 eq)        | 0.5M          | 49%        |
| 3  | Ethyl acrylate (2 eq)        | Ac <sub>2</sub> O (4 eq)      | triethylamine (2.5 eq)        | 0.5M          | 48%        |
| 4  | Ethyl acrylate (2 eq)        | MsCl (2 eq)                   | triethylamine (2.5 eq)        | 0.5M          | -          |
| 5  | Ethyl acrylate (2 eq)        | Tf <sub>2</sub> O (4 eq)      | triethylamine (2.5 eq)        | 0.5M          | -          |
| 6  | Ethyl acrylate (2 eq)        | Ac <sub>2</sub> O (2 eq)      | DBU (2.5 eq)                  | 0.5M          | -          |
| 7  | Ethyl acrylate (2 eq)        | Ac <sub>2</sub> O (2 eq)      | DABCO (2.5 eq)                | 0.5M          | 43%        |
| 8  | <b>Ethyl acrylate (2 eq)</b> | <b>Ac<sub>2</sub>O (1 eq)</b> | <b>triethylamine (2.5 eq)</b> | <b>1.0M</b>   | <b>73%</b> |
| 9  | Ethyl acrylate (4 eq)        | Ac <sub>2</sub> O (1 eq)      | triethylamine (2.5 eq)        | 1.0M          | 72%        |
| 10 | Ethyl acrylate (6 eq)        | Ac <sub>2</sub> O (1 eq)      | triethylamine (2.5 eq)        | 1.0M          | 75%        |

\*yield determined by qNMR, IS: ethylene carbonate (4.48 ppm) vs. aromatic protons (7.98 ppm, 7.79 ppm and 7.69 ppm).

### S4. Stability monitoring **1** and **12** under procedure A and B

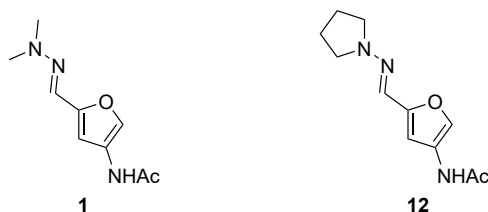

**Scheme 2.** Hydrazone **1** and **12**.

**Table 2.** The stability of hydrazone **1** and **12** under the reaction conditions was monitored by quantitative <sup>1</sup>H-NMR in the absence of a dienophile. At room temperature a minimal decrease in substrate concentration was observed. At 81 °C both **1** and **12** show a similar degree of decomposition.

| # | SUBSTRATE | CONDITIONS | TEMP. | T = 0 | T = 2 | T = 18 |
|---|-----------|------------|-------|-------|-------|--------|
| 1 | 1         | Protocol A | RT    | 97%   | -     | 95%    |
| 2 | 1         | protocol B | 81 °C | 97%   | 82%   | 41%    |
| 3 | 12        | protocol B | 81 °C | 100%  | 87%   | 47%    |

## S5. $^1\text{H-NMR}$ comparison of **1** and **12**

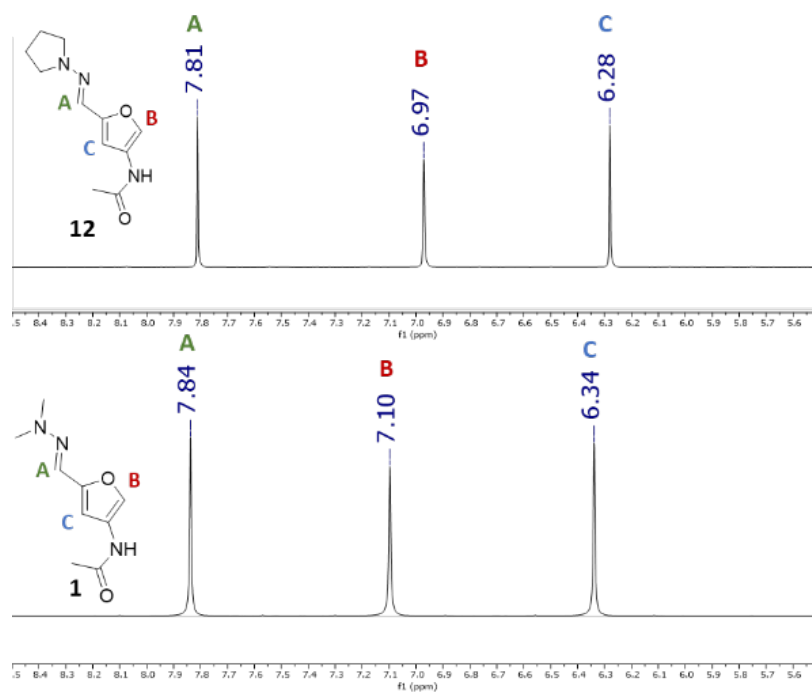

**Figure 1.**  $^1\text{H-NMR}$  comparison **1** and **12**. An upfield shift is observed of protons **B** and **C**, indicating a relative elevated HOMO for **12**.

## S6. 1,4-addition side products

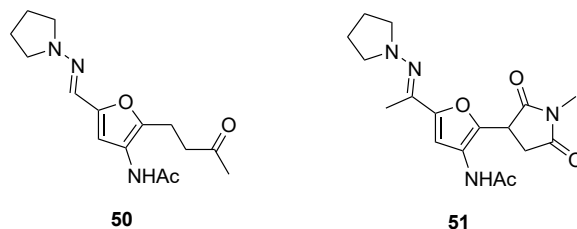

**Scheme 3.** Side products formed via 1,4-addition pathway. **50**: Major product of the reaction between **12** and methyl vinyl ketone. **51**: Major product of the reaction between **28** and N-methylmaleimide. **Note**: In both cases complex product mixtures were obtained consisting of cycloaddition product, 1,4-addition product, a combination of both and other unidentified products. Depicted products were identified by LCMS and  $^1\text{H-NMR}$  analysis of the reaction mixtures and were not isolated.

## Experimental procedures

### S7. Synthesis of 3A5F

***N*-(5-formylfuran-3-yl)acetamide (3A5F)**. Sodium periodate (14.4 g, 1.25 eq., 67.5 mmol) was added to a solution of (*R*)-*N*-(5-(1,2-dihydroxyethyl)furan-3-yl)acetamide (**Di-HAF**) (10.0 g, 1 eq., 54.0 mmol) in water (250 mL) at room temperature. A suspension formed within 5 min and was stirred for 1 h. The mixture was diluted with brine (250 mL) and extracted with ethyl acetate (3 x 300 mL). The combined organic layers were washed with brine, dried over Na<sub>2</sub>SO<sub>4</sub>, and concentrated *in vacuo* to afford a brown solid (~8 g). The product was triturated in TBME (50 mL) for 1 h, filtered and dried *in vacuo* (45 °C) to afford *N*-(5-formylfuran-3-yl)acetamide (6.9 g, 45 mmol, 83%) as beige solid (purity by qNMR: 97%, IS: ethylene carbonate). <sup>1</sup>H-NMR (400 MHz, DMSO-*d*<sub>6</sub>) δ = 10.29 (s, 1H), 9.57 (d, 1H), 8.29 (t, 1H), 7.36 (d, 1H), 2.03 (s, 3H). <sup>13</sup>C-NMR (101 MHz, DMSO-*d*<sub>6</sub>) δ = 178.76, 167.75, 150.09, 136.78, 127.35, 115.31, 22.78. HRMS (ESI) calculated for C<sub>7</sub>H<sub>7</sub>NO<sub>3</sub> (M+H<sup>+</sup>): 154.0499; found (M+H<sup>+</sup>): 154.0498. MP (DSC): 160 °C.

### S8. Synthesis of 1

***N*-(5-((2,2-dimethylhydrazineylidene)methyl)furan-3-yl)acetamide (1)**. 1,1-Dimethylhydrazine (3.3 g, 4.2 mL, 1.5 eq., 55 mmol) was added to a suspension of *N*-(5-formylfuran-3-yl)acetamide (**3A5F**) (5.6 g, 1 eq., 37 mmol) in ethanol (150 mL). The suspension became a solution and was stirred at room temperature for 16 h. The mixture was concentrated *in vacuo* to afford a brown solid, which was triturated in DCM (100 mL) for 1 h. The solids were filtered, washed with ice-cold DCM and dried *in vacuo* to afford *N*-(5-((2,2-dimethylhydrazineylidene)methyl)furan-3-yl)acetamide (**1**) (3.5 g, 18 mmol, 49%) (purity by qNMR: 97%, IS: ethylene carbonate). <sup>1</sup>H-NMR (400 MHz, DMSO-*d*<sub>6</sub>) δ = 9.99 (s, 1H), 7.84 (s, 1H), 7.10 (s, 1H), 6.34 (s, 1H), 2.86 (s, 6H), 1.99 (s, 3H). <sup>13</sup>C-NMR (101 MHz, DMSO-*d*<sub>6</sub>) δ = 167.14, 150.26, 129.89, 126.44, 122.65, 100.81, 42.36, 22.79. HRMS (ESI) calculated for C<sub>9</sub>H<sub>13</sub>N<sub>3</sub>O<sub>2</sub> (M+H<sup>+</sup>): 196.1081; found (M+H<sup>+</sup>): 196.1079 MP (DSC): 130 °C.

### S9. Synthesis of 2

***N*-(7-((2,2-dimethylhydrazineylidene)methyl)-2-methyl-1,3-dioxoisindolin-5-yl)acetamide (2)**. 1-Methyl-1H-pyrrole-2,5-dione (213 mg, 1.5 eq., 1.92 mmol) was added to a solution of *N*-(5-((2,2-dimethylhydrazineylidene)methyl)furan-3-yl)acetamide (**1**) (250 mg, 1 eq., 1.28 mmol) and acetic anhydride (261 mg, 0.24 mL, 2 eq., 2.56 mmol) in acetonitrile (2.5 mL). The mixture was stirred for 1 h at room temperature. The suspension was diluted with TBME (10 mL), the solids were filtered and dried *in vacuo* (45 °C) to afford *N*-(7-((2,2-dimethylhydrazineylidene)methyl)-2-methyl-1,3-dioxoisindolin-5-yl)acetamide (**2**) (284 mg, 0.98 mmol, 77%). <sup>1</sup>H-NMR (400 MHz, DMSO-*d*<sub>6</sub>) δ = 10.46 (s, 1H), 8.08 (d, 1H), 8.05 (d, 1H), 7.91 (s, 1H), 3.06 (s, 6H), 2.98 (s, 3H), 2.09 (s, 3H). <sup>13</sup>C-NMR (101 MHz, DMSO-*d*<sub>6</sub>) δ = 169.16, 168.22, 167.66, 143.97, 136.16, 133.71, 123.17, 118.86, 115.68, 110.97, 42.20, 24.15, 23.49. HRMS (ESI) calculated for C<sub>14</sub>H<sub>16</sub>N<sub>4</sub>O<sub>3</sub> (M+H<sup>+</sup>): 289.1295; found (M+H<sup>+</sup>): 289.1292. MP (DSC): 276 °C.

### S10. Synthesis of 7

**Ethyl 4-acetamido-2-((2,2-dimethylhydrazineylidene)methyl)benzoate (7)**. Ethyl acrylate (256 mg, 0.27 mL, 2 eq., 2.56 mmol) was added to a solution of *N*-(5-((2,2-dimethylhydrazineylidene)methyl)furan-3-yl)acetamide (**1**) (250 mg, 1 eq., 1.28 mmol), triethylamine (324 mg, 0.45 mL, 2.5 eq., 3.20 mmol) and acetic anhydride (144 mg, 0.13 mL, 1.1 eq., 1.41 mmol) in acetonitrile (1 mL). The mixture was stirred at 81 °C for 18 h, concentrated *in vacuo* and the crude was purified by automated column chromatography (heptane/ethyl acetate) to afford ethyl 4-acetamido-2-((2,2-dimethylhydrazineylidene)methyl)benzoate (**7**) (228 mg, 0.82 mmol, 64%) as an off-white solid. <sup>1</sup>H-NMR (400 MHz, DMSO-*d*<sub>6</sub>) δ = 10.21 (s, 1H), 8.02 (d, 1H), 7.98 (s, 1H), 7.79 (d, 1H), 7.69 (dd, 1H), 4.28 (q, 2H), 2.96 (s, 6H), 2.07 (s, 3H), 1.32 (t, 3H). <sup>13</sup>C-NMR (101 MHz, DMSO-*d*<sub>6</sub>) δ = 169.31, 166.87, 142.93, 138.77, 132.07, 130.19, 121.81,

117.28, 114.86, 60.93, 42.89, 24.58, 14.62. HRMS (ESI) calculated for C<sub>14</sub>H<sub>19</sub>N<sub>3</sub>O<sub>3</sub> (M+H<sup>+</sup>): 278.1499; found (M+H<sup>+</sup>): 278.1495. MP (DSC): 144 °C.

### S11. Synthesis of 12

***N*-(5-((pyrrolidin-1-ylimino)methyl)furan-3-yl)acetamide (12)**. Pyrrolidin-1-amine (6.0 g, 1.25 eq., 70 mmol) was added to a suspension of *N*-(5-formylfuran-3-yl)acetamide (**3A5F**) (8.6 g, 1 eq., 56 mmol) in ethanol (200 mL) at 10 °C. The mixture was stirred at room temperature for 4 h, during which a solution was obtained. The mixture was concentrated *in vacuo*, and the crude was purified by automated column chromatography (330 g column, solid load (~ 18 g celite), product dissolved in DCM with small amount of MeOH). Concentration of the fractions with product afforded *N*-(5-((pyrrolidin-1-ylimino)methyl)furan-3-yl)acetamide (**12**) (10.16 g, 45.92 mmol, 82%) as a yellow solid (purity by qNMR: 100%, IS: ethylene carbonate). <sup>1</sup>H-NMR (400 MHz, DMSO-*d*<sub>6</sub>) δ = 9.97 (s, 1H), 7.81 (s, 1H), 6.97 (s, 1H), 6.28 (s, 1H), 3.28 – 3.12 (m, 4H), 1.99 (s, 3H), 1.93 – 1.79 (m, 4H). <sup>13</sup>C-NMR (101 MHz, DMSO-*d*<sub>6</sub>) δ = 167.10, 150.51, 129.55, 126.45, 121.60, 99.91, 50.36, 23.04, 22.79. HRMS (ESI) calculated for C<sub>11</sub>H<sub>15</sub>N<sub>3</sub>O<sub>2</sub> (M+H<sup>+</sup>): 222.1237; found (M+H<sup>+</sup>): 222.1236. MP (DSC): 151 °C.

### S12. Protocol A

**Protocol A (maleimides and fumaronitrile)**: To a mixture of *N*-(5-((pyrrolidin-1-ylimino)methyl)furan-3-yl)acetamide (**12**) (250 mg, 1 eq., 1.13 mmol) in acetonitrile (2 mL) was added triethylamine (286 mg, 0.39 mL, 2.5 eq., 2.82 mmol), acetic anhydride (127 mg, 0.12 mL, 1.1 eq., 1.24 mmol.) and the appropriate dienophile (2.26 mmol, 2 eq.). The suspension was stirred for 18 h at room temperature. The product was filtered off, washed with ethyl acetate (5 mL) and dried *in vacuo* to afford the target compound.

### S13. Protocol B

**Protocol B (maleates and mono-activated alkenes)**: To a mixture of *N*-(5-((pyrrolidin-1-ylimino)methyl)furan-3-yl)acetamide (**12**) (250 mg, 1 eq., 1.13 mmol) in acetonitrile (1 mL) was added triethylamine (286 mg, 0.39 mL, 2.5 eq., 2.82 mmol), acetic anhydride (127 mg, 0.12 mL, 1.1 eq., 1.24 mmol.) and the appropriate dienophile (2.26 mmol, 2 eq.). The suspension was stirred for 18 h at 81 °C. The volatiles were removed *in vacuo* and the crude was purified by automated column chromatography (heptane/ethyl acetate) to afford the target compound.

### S14. Synthesis of 13

**Ethyl 4-acetamido-2-((pyrrolidin-1-ylimino)methyl)benzoate (13)**. Prepared according to protocol **B** with ethyl acrylate (226 mg, 0.24 mL, 2 eq., 2.26 mmol) as dienophile. Ethyl 4-acetamido-2-((pyrrolidin-1-ylimino)methyl)benzoate (**13**) (244 mg, 0.80 mmol, 71%) was obtained as yellow solid. <sup>1</sup>H-NMR (400 MHz, DMSO-*d*<sub>6</sub>) δ = 10.19 (s, 1H), 7.99 (d, 1H), 7.87 (s, 1H), 7.76 (d, 1H), 7.66 (dd, 1H), 4.26 (q, 2H), 3.38 – 3.26 (m, 4H), 2.05 (s, 2H), 1.95 – 1.86 (m, 3H), 1.30 (t, 3H). <sup>13</sup>C-NMR (101 MHz, DMSO-*d*<sub>6</sub>) δ = 168.79, 142.41, 138.72, 131.61, 128.72, 120.82, 116.33, 113.76, 60.36, 50.40, 24.08, 23.15, 14.15. HRMS (ESI) calculated for C<sub>16</sub>H<sub>21</sub>N<sub>3</sub>O<sub>3</sub> (M+H<sup>+</sup>): 304.1656; found (M+H<sup>+</sup>): 304.1655. MP (DSC): 153 °C.

### S15. Synthesis of 14

***N*-(2-methyl-1,3-dioxo-7-((pyrrolidin-1-ylimino)methyl)isoindolin-5-yl)acetamide (14)**. Prepared according to protocol **A** with 1-methyl-1H-pyrrole-2,5-dione (126 mg, 1 eq., 1.13 mmol) as dienophile. *N*-(2-methyl-1,3-dioxo-7-((pyrrolidin-1-ylimino)methyl)isoindolin-5-yl)acetamide (**14**) (315 mg, 1.00 mmol, 89%) was obtained as yellow solid. <sup>1</sup>H-NMR (400 MHz, DMSO-*d*<sub>6</sub>) δ = 10.41 (s, 1H), 8.01 (d, 1H), 7.98 (d, 1H), 7.72 (s, 1H), 3.41 – 3.34 (m, 4H), 2.95 (s, 3H), 2.08 (s, 3H), 1.99 – 1.92 (m, 4H). <sup>13</sup>C-NMR (101 MHz, DMSO-*d*<sub>6</sub>) δ = 169.13, 168.20, 167.69, 143.92, 136.58, 133.72, 122.65, 118.32, 115.25, 110.57, 50.20, 24.14, 23.38 (d). HRMS (ESI) calculated for C<sub>16</sub>H<sub>18</sub>N<sub>4</sub>O<sub>3</sub> (M+H<sup>+</sup>): 315.1452; found (M+H<sup>+</sup>): 315.1450. MP (DSC): 299 °C.

## S16. Synthesis of 15

***N*-(2-benzyl-1,3-dioxo-7-((pyrrolidin-1-ylimino)methyl)isoindolin-5-yl)acetamide (15)**. Prepared according to protocol **A** with 1-benzyl-1H-pyrrole-2,5-dione (423 mg, 2 eq., 2.26 mmol) as dienophile. The product was triturated in DCM for 1 h to afford *N*-(2-benzyl-1,3-dioxo-7-((pyrrolidin-1-ylimino)methyl)isoindolin-5-yl)acetamide (**15**) (399 mg, 1.02 mmol, 90%) as yellow solid. <sup>1</sup>H-NMR (400 MHz, DMSO-*d*<sub>6</sub>) δ = 10.49 (s, 1H), 8.11 (d, 1H), 8.06 (d, 1H), 7.80 (s, 1H), 7.37 – 7.21 (m, 5H), 4.71 (s, 2H), 3.43 – 3.36 (m, 4H), 2.09 (s, 3H), 1.99 – 1.90 (m, 4H). <sup>13</sup>C-NMR (101 MHz, DMSO-*d*<sub>6</sub>) δ = 169.23, 144.21, 137.06, 136.89, 133.57, 128.57, 127.39 (d), 122.42, 117.94, 115.64, 110.90, 50.27, 40.70, 24.16, 23.32. HRMS (ESI) calculated for C<sub>22</sub>H<sub>22</sub>N<sub>4</sub>O<sub>3</sub> (M+H<sup>+</sup>): 391.1765; found (M+H<sup>+</sup>): 391.1760. MP (DSC): 300 °C.

## S17. Synthesis of 16

***N*-(1,3-dioxo-2-phenyl-7-((pyrrolidin-1-ylimino)methyl)isoindolin-5-yl)acetamide (16)**. Prepared according to protocol **A** with 1-phenyl-1H-pyrrole-2,5-dione (391 mg, 2 eq., 2.26 mmol) as dienophile. *N*-(1,3-dioxo-2-phenyl-7-((pyrrolidin-1-ylimino)methyl)isoindolin-5-yl)acetamide (**16**) (380 mg, 1.01 mmol, 89%) was obtained as yellow solid. <sup>1</sup>H-NMR (400 MHz, DMSO-*d*<sub>6</sub>) δ = 10.52 (s, 1H), 8.16 (d, 1H), 8.13 (d, 1H), 7.85 (s, 1H), 7.55 – 7.46 (m, 2H), 7.42 (dt, 3H), 3.46 – 3.35 (m, 4H), 2.11 (s, 3H), 2.01 – 1.94 (m, 4H). <sup>13</sup>C-NMR (101 MHz, DMSO-*d*<sub>6</sub>) δ = 169.28, 167.20, 166.69, 144.32, 137.26, 133.57, 131.99, 128.73, 127.85, 127.34, 122.50, 117.90, 115.82, 110.94, 50.28, 24.19, 23.32. HRMS (ESI) calculated for C<sub>21</sub>H<sub>20</sub>N<sub>4</sub>O<sub>3</sub> (M+H<sup>+</sup>): 377.1608; found (M+H<sup>+</sup>): 377.1610. MP (DSC): 314 °C.

## S18. Synthesis of 17

**Dimethyl 5-acetamido-3-((pyrrolidin-1-ylimino)methyl)phthalate (17)**. Prepared according to protocol **B** with dimethyl maleate (326 mg, 0.28 mL, 2 eq., 2.26 mmol) or dimethyl fumarate (326 mg, 2 eq., 2.26 mmol) as dienophile. Dimethyl 5-acetamido-3-((pyrrolidin-1-ylimino)methyl)phthalate (**17**) (244 mg, 0.70 mmol, 62%) was obtained as yellow solid. <sup>1</sup>H-NMR (400 MHz, DMSO-*d*<sub>6</sub>) δ = 10.27 (s, 1H), 8.08 (s, 2H), 6.92 (s, 1H), 3.81 (s, 3H), 3.78 (s, 3H), 3.32 – 3.26 (m, 4H), 2.06 (s, 3H), 1.94 – 1.86 (m, 4H). <sup>13</sup>C-NMR (101 MHz, DMSO-*d*<sub>6</sub>) δ = 168.87, 168.19, 165.95, 140.12, 135.70, 129.31, 124.75, 117.40, 117.07, 52.61, 52.26, 50.21, 24.03, 23.16. HRMS (ESI) calculated for C<sub>17</sub>H<sub>21</sub>N<sub>3</sub>O<sub>5</sub> (M+H<sup>+</sup>): 348.1554; found (M+H<sup>+</sup>): 348.1549. MP (DSC): 186 °C.

## S19. Synthesis of 18

***N*-(3,4-dicyano-5-((pyrrolidin-1-ylimino)methyl)phenyl)acetamide (18)**. Prepared according to protocol **A** with fumaronitrile (176 mg, 2 eq., 2.26 mmol) as dienophile. *N*-(3,4-dicyano-5-((pyrrolidin-1-ylimino)methyl)phenyl)acetamide (**18**) (260 mg, 0.92 mmol, 82%) was obtained as off-white solid. <sup>1</sup>H-NMR (400 MHz, DMSO-*d*<sub>6</sub>) δ = 10.57 (s, 1H), 8.06 (d, 1H), 8.03 (d, 1H), 6.97 (s, 1H), 3.51 – 3.37 (m, 4H), 2.08 (s, 3H), 2.01 – 1.88 (m, 4H). <sup>13</sup>C-NMR (101 MHz, DMSO-*d*<sub>6</sub>) δ = 169.63, 143.04, 142.81, 121.26, 120.27, 116.29, 115.90, 115.67, 115.34, 102.56, 50.33, 24.23, 23.40. HRMS (ESI) calculated for C<sub>15</sub>H<sub>15</sub>N<sub>5</sub>O (M+H<sup>+</sup>): 282.1349; found (M+H<sup>+</sup>): 282.1348. MP (DSC): 284 °C.

## S20. Synthesis of 19

***N*-(4-cyano-3-((pyrrolidin-1-ylimino)methyl)phenyl)acetamide (19)**. Prepared according to protocol **B** with acrylonitrile (120 mg, 0.15 mL, 2 eq., 2.26 mmol) as dienophile. *N*-(4-cyano-3-((pyrrolidin-1-ylimino)methyl)phenyl)acetamide (**19**) (242 mg, 0.94 mmol, 84%) was obtained as yellow solid. <sup>1</sup>H-NMR (400 MHz, DMSO-*d*<sub>6</sub>) δ = 10.28 (s, 1H), 7.99 (d, 1H), 7.63 (dd, 1H), 7.59 (dd, 1H), 7.10 (s, 1H), 3.42 – 3.34 (m, 4H), 2.06 (s, 3H), 1.98 – 1.85 (m, 4H). <sup>13</sup>C-NMR (101 MHz, DMSO-*d*<sub>6</sub>) δ = 169.04, 143.17, 140.87, 133.87, 123.65, 118.11, 116.66, 112.51, 101.23, 50.22, 24.15, 23.28. HRMS (ESI) calculated for C<sub>14</sub>H<sub>16</sub>N<sub>4</sub>O (M+H<sup>+</sup>): 257.1397; found (M+H<sup>+</sup>): 257.1394. MP (DSC): 198 °C.



## S21. Synthesis of 20

***tert*-Butyl 4-acetamido-2-((pyrrolidin-1-ylimino)methyl)benzoate (20).** Prepared according to protocol **B** with *N*-(5-((pyrrolidin-1-ylimino)methyl)furan-3-yl)acetamide (**12**) (1.0 g, 1 eq., 4.5 mmol) and *tert*-butyl acrylate (1.2 g, 1.3 mL, 2 eq., 9.0 mmol) as dienophile. *tert*-Butyl 4-acetamido-2-((pyrrolidin-1-ylimino)methyl)benzoate (**20**) (1.1 g, 3.3 mmol, 73%) was obtained as yellow solid. <sup>1</sup>H-NMR (400 MHz, DMSO-*d*<sub>6</sub>) δ = 10.16 (s, 1H), 7.97 (d, 1H), 7.81 (s, 1H), 7.69 (d, 1H), 7.63 (dd, 1H), 3.32 – 3.29 (m, 4H), 2.04 (s, 3H), 1.95 – 1.88 (m, 4H), 1.53 (s, 8H). <sup>13</sup>C-NMR (101 MHz, DMSO-*d*<sub>6</sub>) δ = 168.73, 166.03, 142.03, 138.10, 131.57, 128.73, 122.72, 116.36, 113.70, 80.64, 50.45, 27.92, 24.07, 23.15. HRMS (ESI) calculated for C<sub>18</sub>H<sub>25</sub>N<sub>3</sub>O<sub>3</sub> (M+H<sup>+</sup>): 332.1969; found (M+H<sup>+</sup>): 332.1967. MP (DSC): 151 °C.

## S22. Synthesis of 21

***N*-(4-(methylsulfonyl)-3-((pyrrolidin-1-ylimino)methyl)phenyl)acetamide (21).** Prepared according to protocol **B** with (methylsulfonyl)ethene (240 mg, 0.2 mL, 2 eq., 2.26 mmol) as dienophile. After column chromatography the product was triturated in TBME (5 mL) to afford *N*-(4-(methylsulfonyl)-3-((pyrrolidin-1-ylimino)methyl)phenyl)acetamide (**21**) (261 mg, 0.84 mmol, 75%) as light yellow solid. <sup>1</sup>H-NMR (400 MHz, DMSO-*d*<sub>6</sub>) δ = 10.32 (s, 1H), 8.08 (d, 1H), 7.77 (d, 1H), 7.73 (dd, 1H), 7.66 (s, 1H), 3.46 – 3.37 (m, 4H), 3.16 (s, 3H), 2.07 (s, 3H), 2.00 – 1.91 (m, 4H). <sup>13</sup>C-NMR (101 MHz, DMSO-*d*<sub>6</sub>) δ = 169.01, 143.46, 136.82, 129.98, 129.50, 124.40, 116.04, 113.79, 50.32, 44.18, 24.11, 23.24. HRMS (ESI) calculated for C<sub>14</sub>H<sub>19</sub>N<sub>3</sub>O<sub>3</sub>S (M+H<sup>+</sup>): 310.1220; found (M+H<sup>+</sup>): 310.1214. MP (DSC): 196 °C.

## S23. Synthesis of 22

**Diethyl 4-acetamido-2-((pyrrolidin-1-ylimino)methyl)phenyl)phosphonate (22).** Prepared according to protocol **B** with diethyl vinylphosphonate (927 mg, 0.87 mL, 5 eq., 5.65 mmol) as dienophile. Diethyl 4-acetamido-2-((pyrrolidin-1-ylimino)methyl)phenyl)phosphonate (**22**) (278 mg, 0.76 mmol, 67%) was obtained as light orange solid. <sup>1</sup>H-NMR (400 MHz, DMSO-*d*<sub>6</sub>) δ = 10.18 (s, 1H), 8.03 – 7.98 (m, 1H), 7.68 – 7.66 (m, 1H), 7.67 – 7.61 (m, 1H), 7.57 (s, 1H), 4.10 – 3.88 (m, 4H), 3.32 – 3.28 (m, 4H), 2.05 (s, 3H), 1.96 – 1.87 (m, 4H), 1.21 (t, 6H). <sup>13</sup>C-NMR (101 MHz, DMSO-*d*<sub>6</sub>) δ = 168.82, 142.78, 140.60 (d), 134.46 (d), 128.35 (d), 117.73 (d), 116.09 (d), 113.12 (d), 61.41 (d), 50.33, 24.07, 23.15, 16.16 (d). HRMS (ESI) calculated for C<sub>17</sub>H<sub>26</sub>N<sub>3</sub>O<sub>4</sub>P (M+H<sup>+</sup>): 368.1734; found (M+H<sup>+</sup>): 368.1728. MP (DSC): 197 °C.

## S24. Synthesis of 25

***tert*-Butyl 4-acetamido-2-formylbenzoate (25).** A solution of *tert*-butyl 4-acetamido-2-((pyrrolidin-1-ylimino)methyl)benzoate (**20**) (350 mg, 1 eq., 1.06 mmol) in DCM (5.0 mL) was cooled to -78 °C. The mixture was subjected to ozonolysis for 3 min, during which a color change was observed: yellow → dark orange → brown → dark yellow → greenish-blue. The mixture was purged with N<sub>2</sub> for 5 min to afford a yellow solution, concentrated *in vacuo* and was purified by automated column chromatography (heptane/ethyl acetate) to furnish *tert*-butyl 4-acetamido-2-formylbenzoate (**25**) (186 mg, 0.71 mmol, 67%) as a white solid. <sup>1</sup>H-NMR (400 MHz, DMSO-*d*<sub>6</sub>) δ = 10.43 (s, 2H), 8.01 (d, 1H), 7.89 (dd, 1H), 7.85 (d, 1H), 2.09 (s, 3H), 1.55 (s, 9H). <sup>13</sup>C-NMR (101 MHz, DMSO-*d*<sub>6</sub>) δ = 192.54, 169.13, 164.69, 142.76, 138.06, 131.35, 127.13, 121.94, 117.21, 82.06, 27.74, 24.13. HRMS (ESI) calculated for C<sub>14</sub>H<sub>17</sub>NO<sub>4</sub> (M+Na<sup>+</sup>): 286.1050; found (M+Na<sup>+</sup>): 286.1046. MP (DSC): 129 °C.

## S25. Synthesis of 26

***tert*-Butyl 4-acetamido-2-cyanobenzoate (26).** A solution of *tert*-butyl 4-acetamido-2-((pyrrolidin-1-ylimino)methyl)benzoate (**20**) (350 mg, 1 eq., 1.06 mmol) in DCM (5.0 mL) was cooled to 0 °C. *m*CPBA (325 mg, 70% Wt, 1.25 eq., 1.32 mmol) was added portionwise while maintaining a temperature < 10 °C. The cooling was removed, and the mixture was stirred for 1 h at room temperature. The mixture was diluted with ethyl acetate (50 mL) and washed with NaHCO<sub>3</sub> (aq., sat.) + Na<sub>2</sub>S<sub>2</sub>O<sub>3</sub> (aq., 10%) (1:1) (5 x 50 mL) (thoroughly) and brine (1 x 25 mL). The organic phase was dried over Na<sub>2</sub>SO<sub>4</sub>, concentrated *in vacuo* and the crude product was purified by automated column

chromatography (heptane/ethyl acetate). *tert*-Butyl 4-acetamido-2-cyanobenzoate (**26**) (218 mg, 0.84 mmol, 79%) was isolated as a light yellow solid. <sup>1</sup>H-NMR (400 MHz, DMSO-*d*<sub>6</sub>) δ = 10.55 (s, 1H), 8.18 (d, 1H), 8.00 (d, 1H), 7.84 (dd, 1H), 2.10 (s, 3H), 1.56 (s, 9H). <sup>13</sup>C-NMR (101 MHz, DMSO-*d*<sub>6</sub>) δ = 169.45, 162.43, 143.13, 132.17, 126.76, 123.61, 122.09, 117.55, 112.29, 82.49, 27.65, 24.16. HRMS (ESI) calculated for C<sub>14</sub>H<sub>16</sub>N<sub>2</sub>O<sub>3</sub> (M+Na<sup>+</sup>): 283.1053; found (M+H<sup>+</sup>): 283.1053. MP (DSC): 188 °C.

## S26. Synthesis of 27

***N*-(5-(1-(2,2-dimethylhydrazineylidene)ethyl)furan-3-yl)acetamide (27)**. A mixture of *N*-(5-acetylfuran-3-yl)acetamide (**3A5AF**) (1.30 g, 1 eq., 7.78 mmol), 1,1-dimethylhydrazine (701 mg, 0.88 mL, 1.5 eq., 11.7 mmol) and acetic acid (467 mg, 0.45 mL, 1 eq., 7.78 mmol) in ethanol (25 mL) was stirred at reflux temperature for 6 h. The mixture was diluted with ethyl acetate (200 mL) and washed with NaHCO<sub>3</sub> (aq., sat., 2 x 200 mL) and brine (50 mL). The organic layer was dried over Na<sub>2</sub>SO<sub>4</sub> and concentrated *in vacuo* to afford a black oil (1.46 g). The crude was purified by automated column chromatography (DCM/MeOH) to afford *N*-(5-(1-(2,2-dimethylhydrazineylidene)ethyl)furan-3-yl)acetamide (**27**) (1.18 g, 5.64 mmol, 73%) as a light brown oil that solidified upon standing. <sup>1</sup>H-NMR (400 MHz, DMSO-*d*<sub>6</sub>) δ = 10.04 (s, 1H), 7.95 (s, 1H), 6.66 (s, 1H), 2.49 (s, 6H), 2.15 (s, 3H), 2.00 (s, 3H). <sup>13</sup>C-NMR (101 MHz, DMSO-*d*<sub>6</sub>) δ = 167.30, 151.89, 150.16, 131.80, 126.48, 104.01, 47.01, 22.82, 14.18. HRMS (ESI) calculated for C<sub>10</sub>H<sub>15</sub>N<sub>3</sub>O<sub>2</sub> (M+H<sup>+</sup>): 210.1237; found (M+H<sup>+</sup>): 210.1235. MP (DSC): 85 °C.

## S27. Synthesis of 32

***N*-(7-(1-(2,2-Dimethylhydrazineylidene)ethyl)-2-methyl-1,3-dioxoisindolin-5-yl)acetamide (32)**. A solution of *N*-(5-(1-(2,2-dimethylhydrazineylidene)ethyl)furan-3-yl)acetamide (**27**) (1.25 g, 1 eq., 5.97 mmol), acetic anhydride (671 mg, 0.62 mL, 1.1 eq., 6.57 mmol) and 1-methyl-1H-pyrrole-2,5-dione (1.33 g, 2.0 eq., 11.9 mmol) in acetonitrile (6 mL) was stirred at reflux temperature for 20 h. The mixture was concentrated *in vacuo* and the crude was purified by automated column chromatography (DCM/MeOH, *see chromatogram below*). **Fraction 1**: *N*-(7-acetyl-2-methyl-1,3-dioxoisindolin-5-yl)acetamide (**33**) (657 mg, 2.52 mmol, 42%), **Fraction 2**: *N*-(7-(1-(2,2-dimethylhydrazineylidene)ethyl)-2-methyl-1,3-dioxoisindolin-5-yl)acetamide (**32**) as *cis/trans* mixture (2:8) (830 mg, 2.75 mmol, 46%). <sup>1</sup>H-NMR (400 MHz, DMSO-*d*<sub>6</sub>) δ = 10.56 (s, 1H), 8.20 (s, 1H), 8.14 (s, 1H), 7.62 (s, 1H), 7.53 (s, 1H), 2.99 (s, 3H), 2.81 (s, 3H), 2.55 (s, 6H), 2.30 (s, 2H), 2.22 (s, 3H), 2.15 (s, 3H), 2.10 (s, 3H). <sup>13</sup>C NMR (101 MHz, DMSO-*d*<sub>6</sub>) δ = 169.36, 167.40, 167.02, 160.42, 144.22, 139.01, 137.46, 134.06, 122.20, 121.79, 120.68, 112.30, 46.66, 24.21, 23.72, 18.93. HRMS (ESI) calculated for C<sub>15</sub>H<sub>18</sub>N<sub>4</sub>O<sub>3</sub> (M+H<sup>+</sup>): 303.1452; found (M+H<sup>+</sup>): 303.1451. MP (DSC): 172 °C.

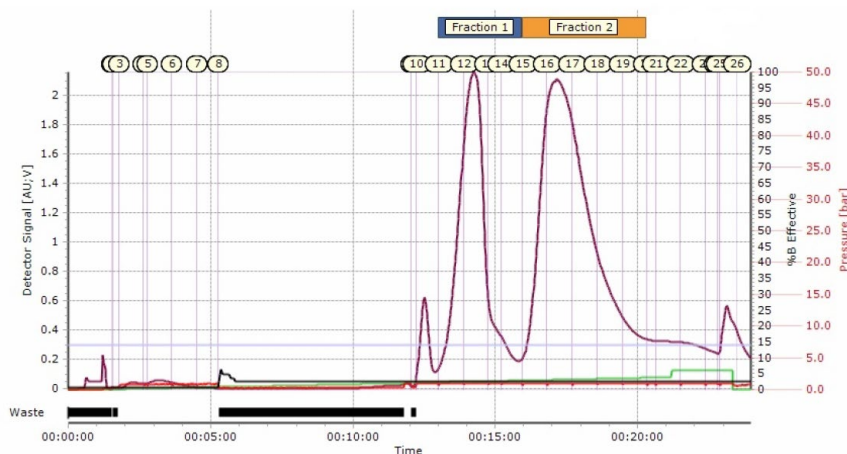

**Figure 2.** Chromatogram of purification of **32**. F1 (blue): ketone **33**, F2 (orange): **32**

## S28. Synthesis of **33**

***N*-(7-acetyl-2-methyl-1,3-dioxoisindolin-5-yl)acetamide (33)**. A solution of *N*-(7-(1-(2,2-dimethylhydrazineylidene)ethyl)-2-methyl-1,3-dioxoisindolin-5-yl)acetamide (**32**) (250 mg, 1 eq., 0.83 mmol) in DCM (5.0 mL) was cooled to -78 °C. The mixture was subjected to ozonolysis for 5 min, during which a color change was observed: dark green/brown → dark greenish-blue. The mixture was purged with N<sub>2</sub> for 5 min to afford a yellow solution. The mixture was concentrated *in vacuo* and was purified by automated column chromatography (heptane/ethyl acetate) to furnish *N*-(7-acetyl-2-methyl-1,3-dioxoisindolin-5-yl)acetamide (**33**) (131 mg, 0.50 mmol, 61%) as a white solid. <sup>1</sup>H-NMR (400 MHz, DMSO-*d*<sub>6</sub>) δ = 10.65 (s, 1H), 8.21 (d, 1H), 7.79 (d, 1H), 3.01 (s, 3H), 2.67 (s, 3H), 2.12 (s, 3H). <sup>13</sup>C-NMR (101 MHz, DMSO-*d*<sub>6</sub>) δ = 200.74, 169.50, 167.02, 166.80, 144.58, 138.68, 134.07, 121.35, 120.49, 113.88, 30.71, 24.21, 23.88. HRMS (ESI) calculated for C<sub>13</sub>H<sub>12</sub>N<sub>2</sub>O<sub>4</sub> (M+H<sup>+</sup>): 261.0870; found (M+H<sup>+</sup>): 261.0868. MP (DSC): 196 °C.

# Characterization

## S29. Spectra of 3A5F

$^1\text{H-NMR}$  ( $\text{DMSO-}d_6$ )

$^1\text{H-NMR}$  (400 MHz,  $\text{DMSO-}d_6$ )  $\delta$  = 10.29 (s, 1H), 9.57 (d, 1H), 8.29 (t, 1H), 7.36 (d, 1H), 2.03 (s, 3H)

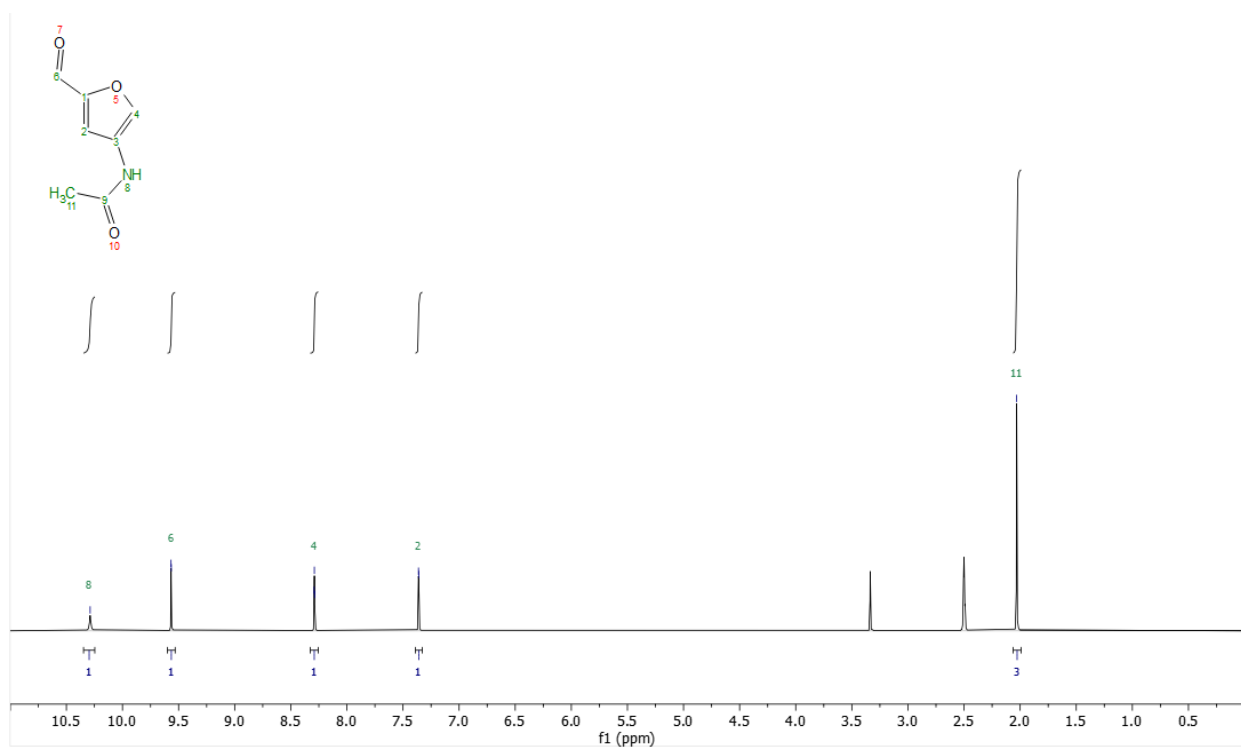

$^{13}\text{C-NMR}$  ( $\text{DMSO-}d_6$ )

$^{13}\text{C-NMR}$  (101 MHz,  $\text{DMSO-}d_6$ )  $\delta$  = 178.76, 167.75, 150.09, 136.78, 127.35, 115.31, 22.78

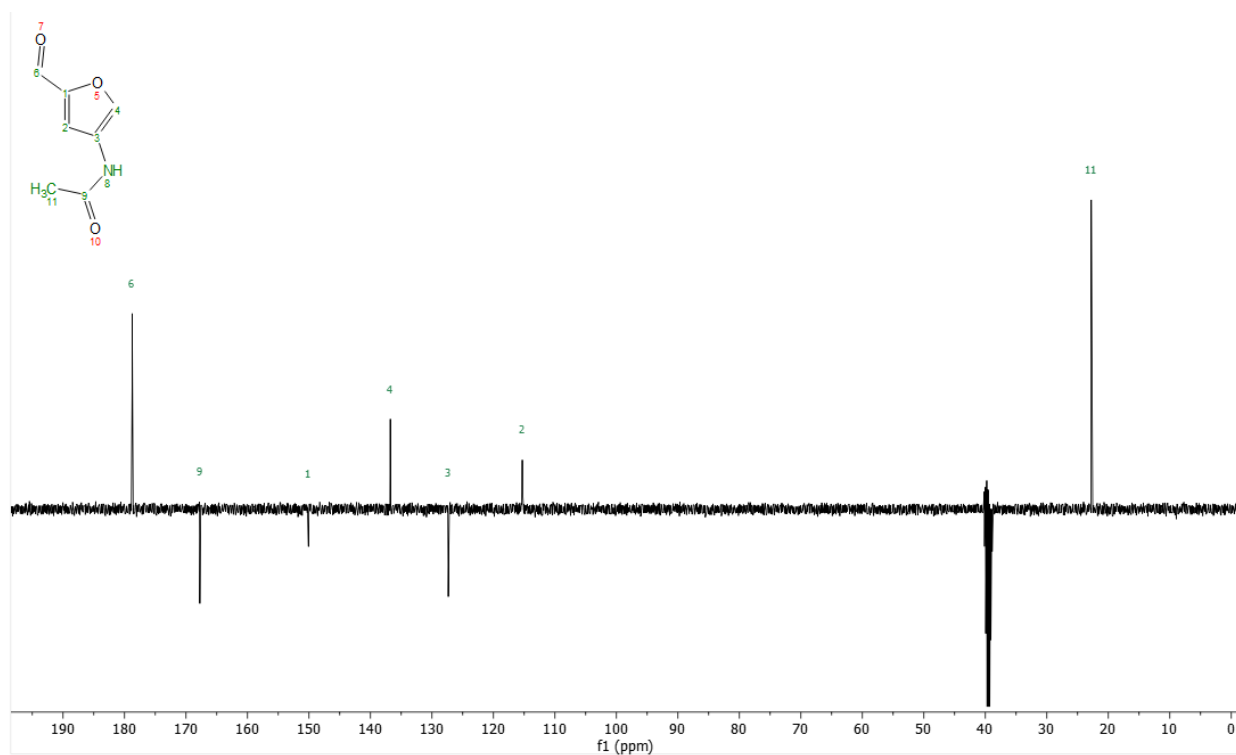

# IR

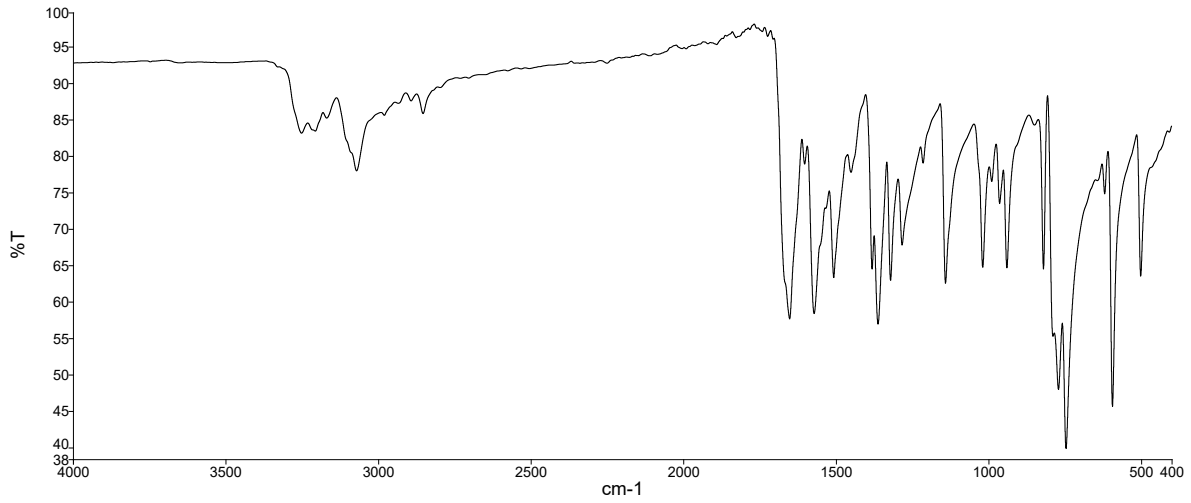

# DSC

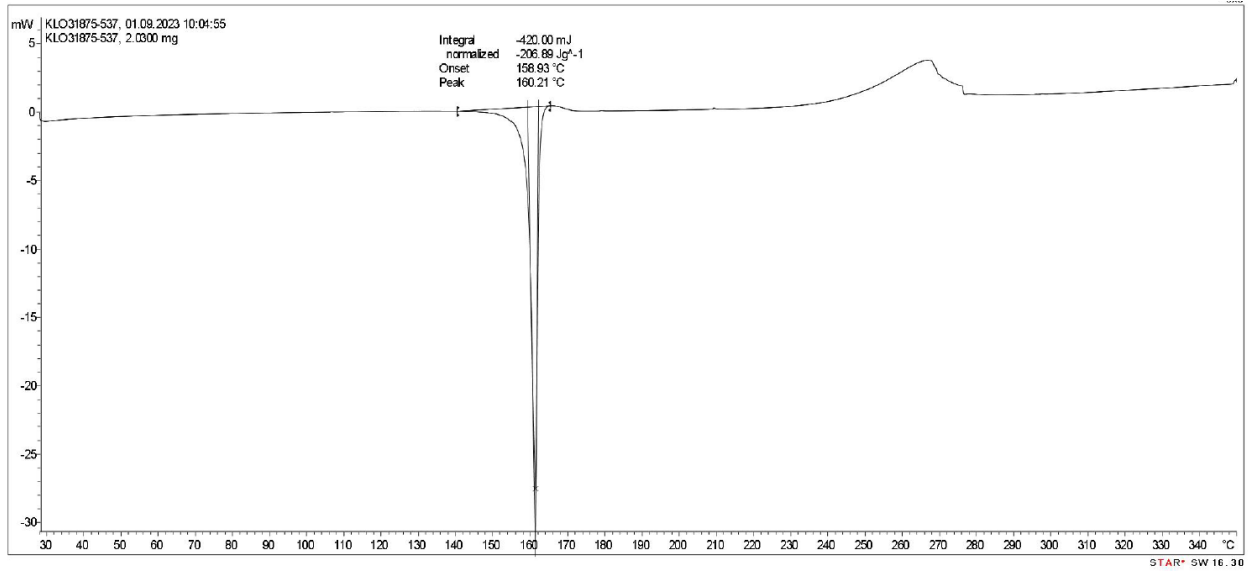

# HRMS

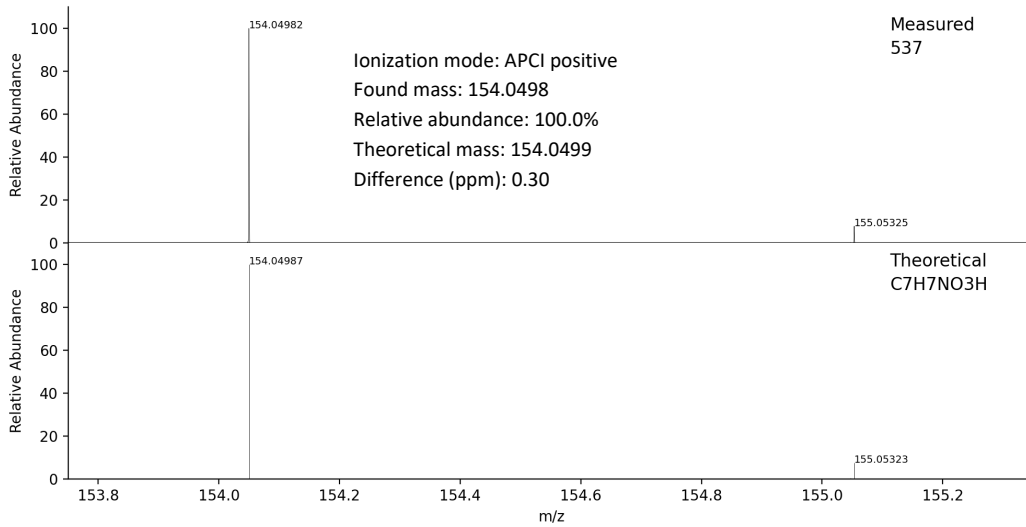

### S30. Spectra of 1

#### <sup>1</sup>H-NMR (DMSO-*d*<sub>6</sub>)

<sup>1</sup>H-NMR (400 MHz, DMSO-*d*<sub>6</sub>) δ = 9.99 (s, 1H), 7.84 (s, 1H), 7.10 (s, 1H), 6.34 (s, 1H), 2.86 (s, 6H), 1.99 (s, 3H)

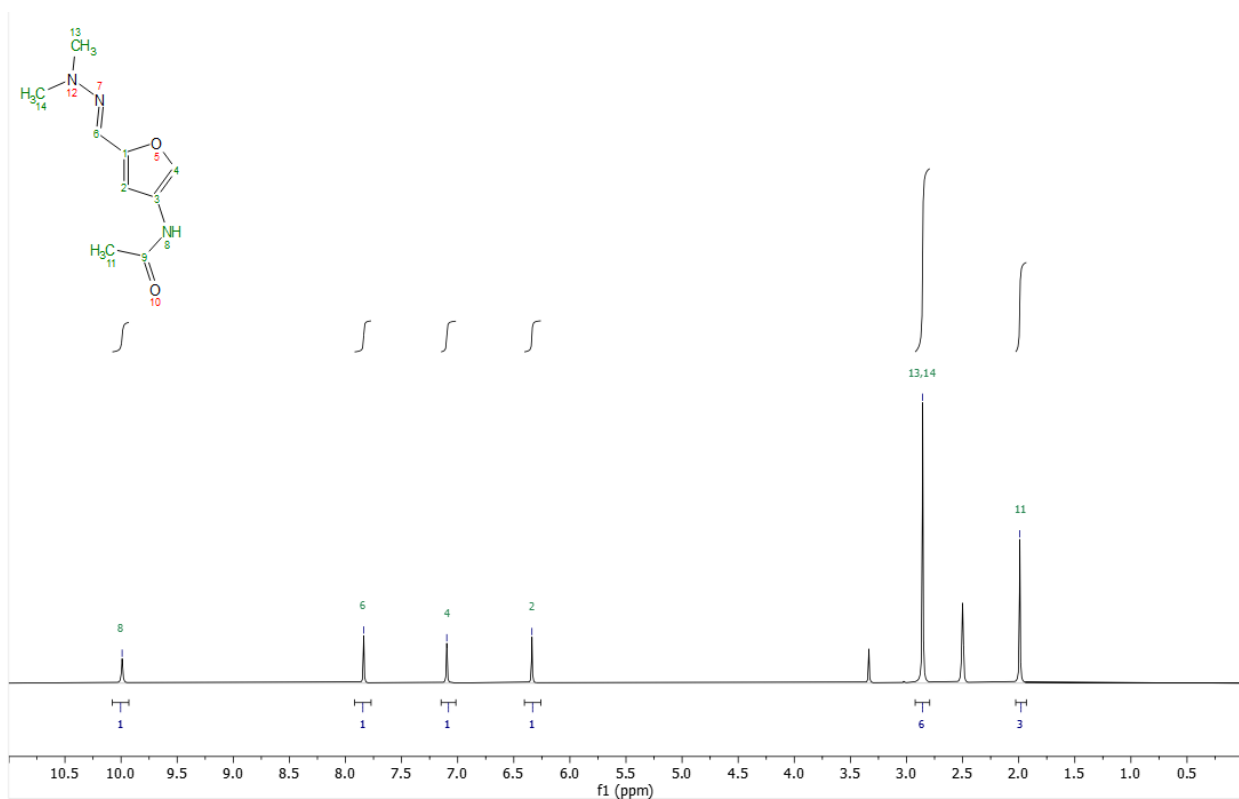

#### <sup>13</sup>C-NMR (DMSO-*d*<sub>6</sub>)

<sup>13</sup>C-NMR (101 MHz, DMSO-*d*<sub>6</sub>) δ = 167.14, 150.26, 129.89, 126.44, 122.65, 100.81, 42.36, 22.79

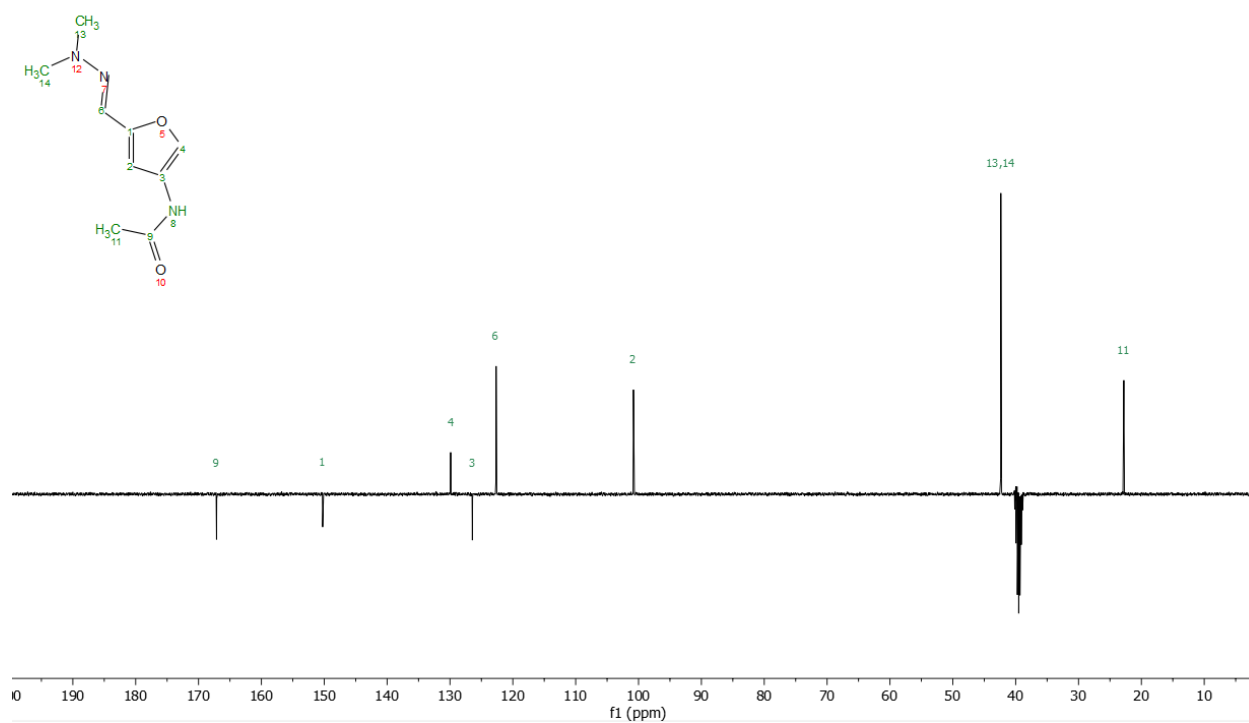

### IR

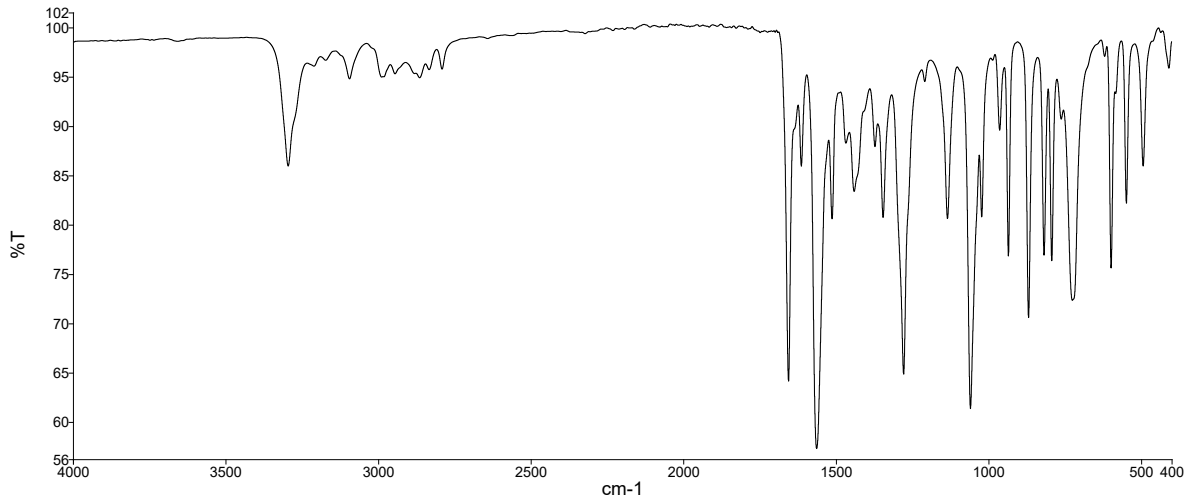

### DSC

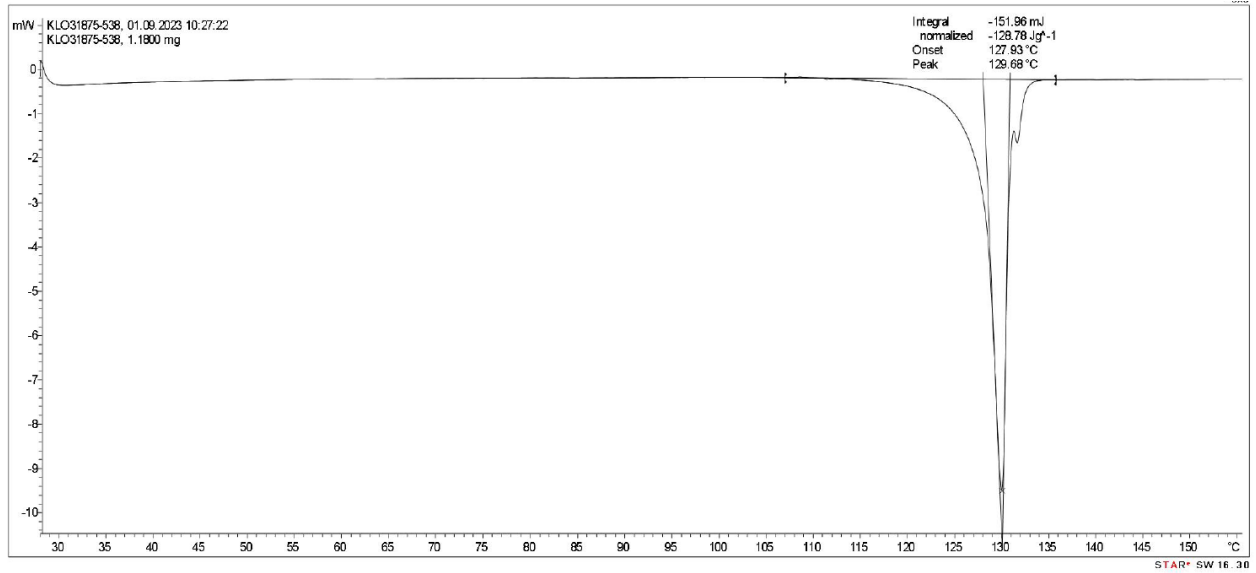

### HRMS

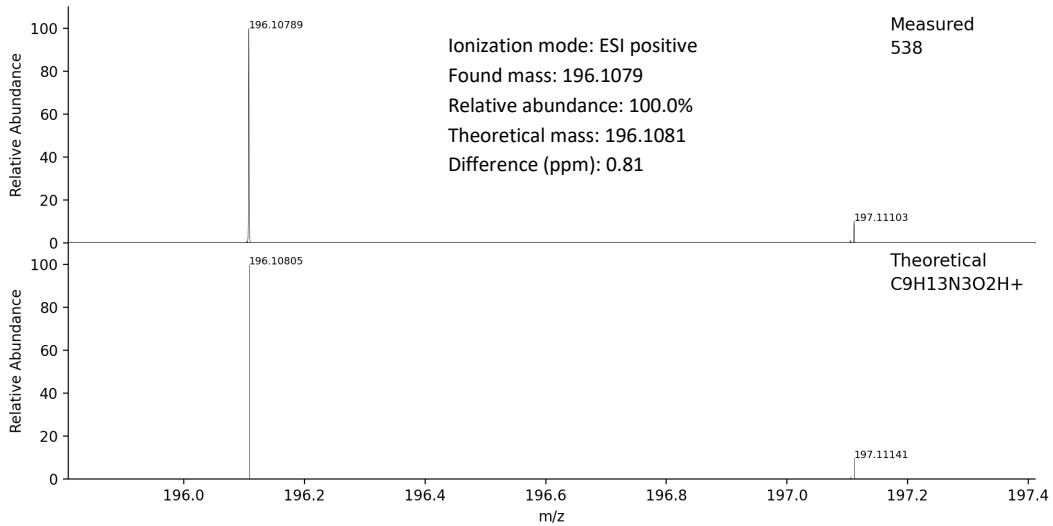

## S31. Spectra of 2

### $^1\text{H-NMR}$ (DMSO- $d_6$ )

$^1\text{H-NMR}$  (400 MHz, DMSO- $d_6$ )  $\delta$  = 10.46 (s, 1H), 8.08 (d, 1H), 8.05 (d, 1H), 7.91 (s, 1H), 3.06 (s, 6H), 2.98 (s, 3H), 2.09 (s, 3H)

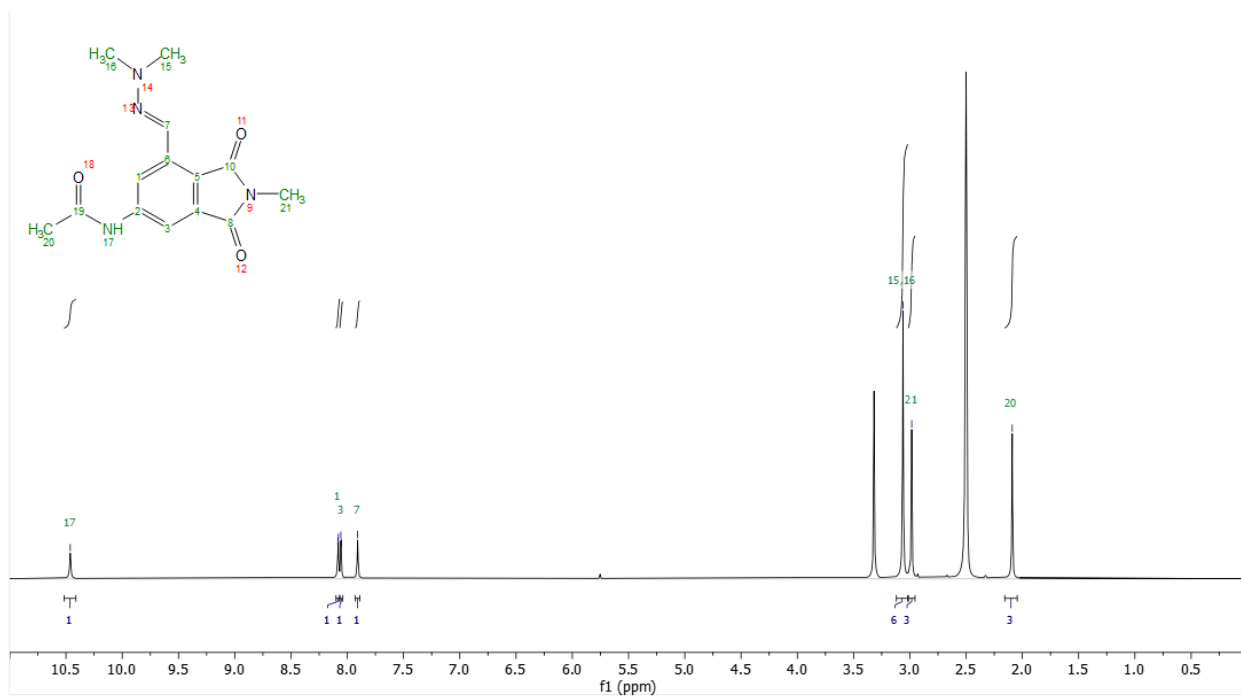

### $^{13}\text{C-NMR}$ (DMSO- $d_6$ )

$^{13}\text{C-NMR}$  (101 MHz, DMSO- $d_6$ )  $\delta$  = 169.16, 168.22, 167.66, 143.97, 136.16, 133.71, 123.17, 118.86, 115.68, 110.97, 42.20, 24.15, 23.49

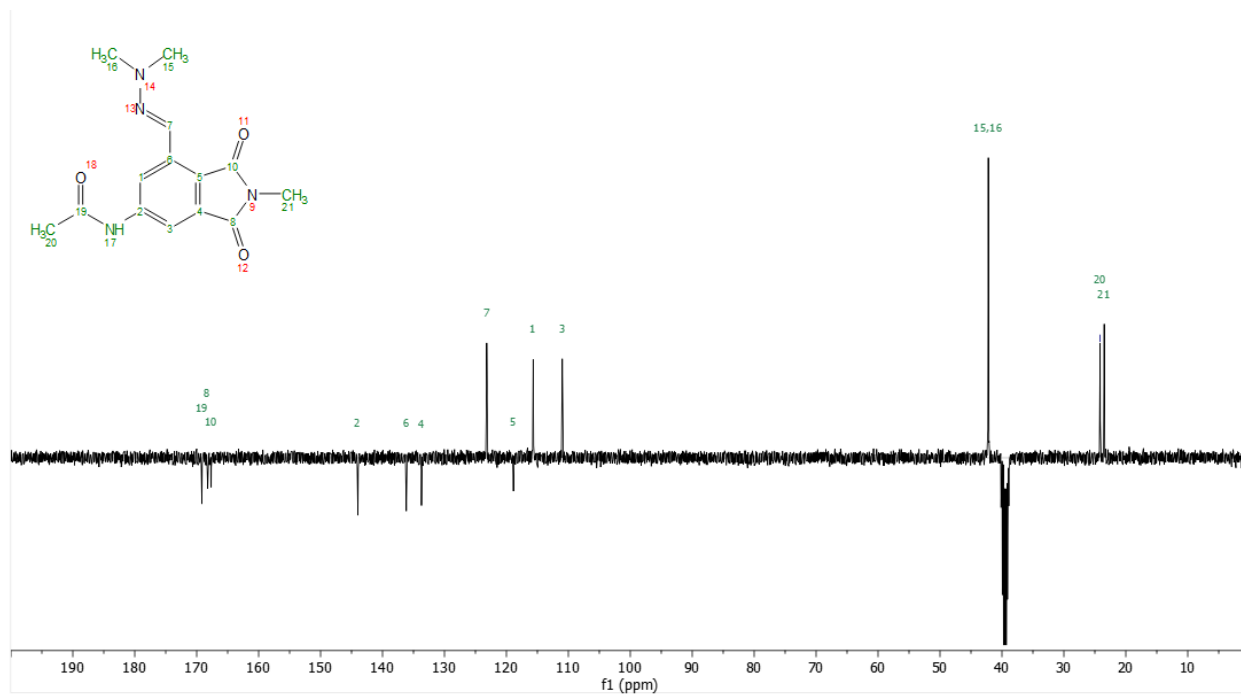



### IR

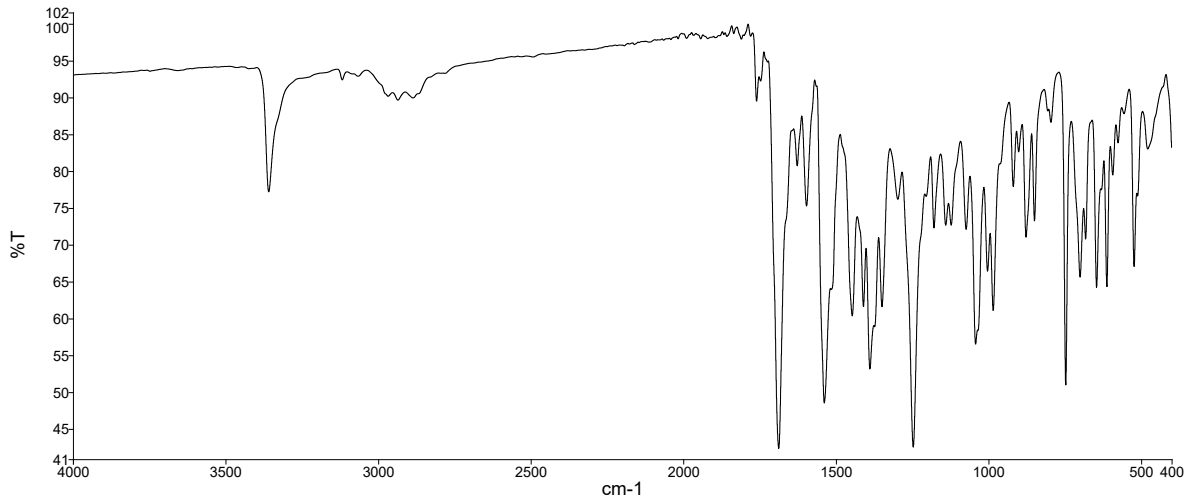

### DSC

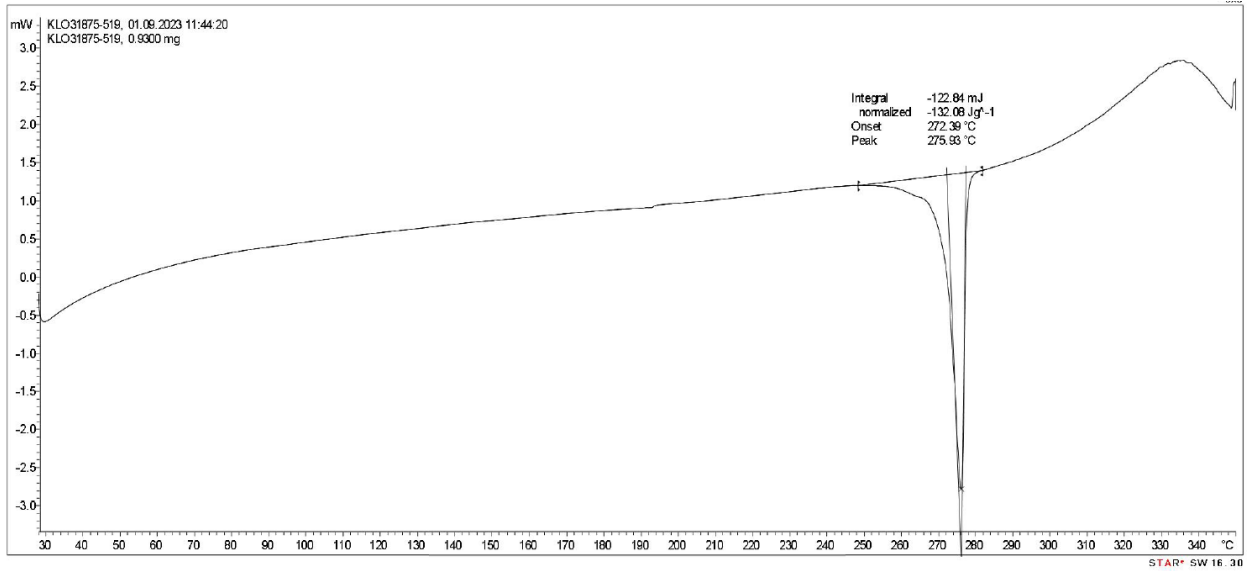

### HRMS

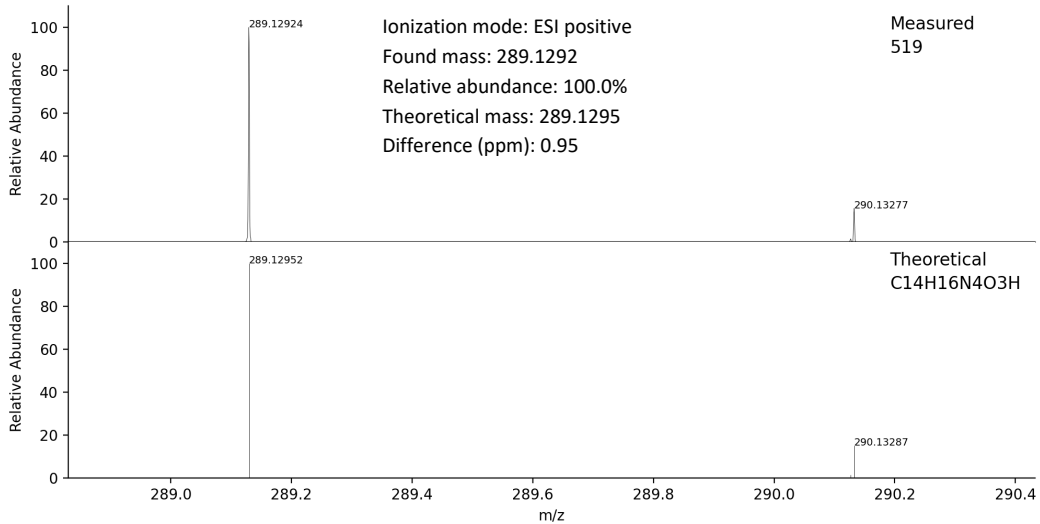

## S32. Spectra of 7

### $^1\text{H-NMR}$ (DMSO- $d_6$ )

$^1\text{H-NMR}$  (400 MHz, DMSO- $d_6$ )  $\delta$  = 10.21 (s, 1H), 8.02 (d, 1H), 7.98 (s, 1H), 7.79 (d, 1H), 7.69 (dd, 1H), 4.28 (q, 2H), 2.96 (s, 6H), 2.07 (s, 3H), 1.32 (t, 3H)

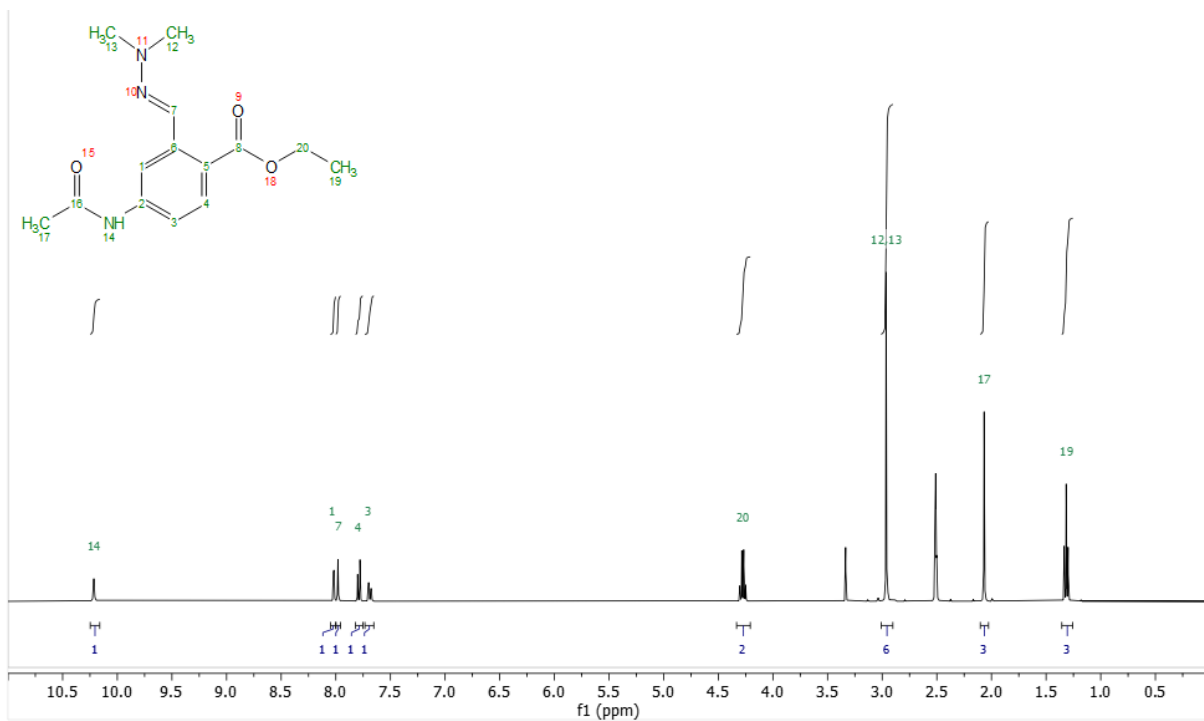

### $^{13}\text{C-NMR}$ (DMSO- $d_6$ )

$^{13}\text{C-NMR}$  (101 MHz, DMSO- $d_6$ )  $\delta$  = 169.31, 166.87, 142.93, 138.77, 132.07, 130.19, 121.81, 117.28, 114.86, 60.93, 42.89, 24.58, 14.62

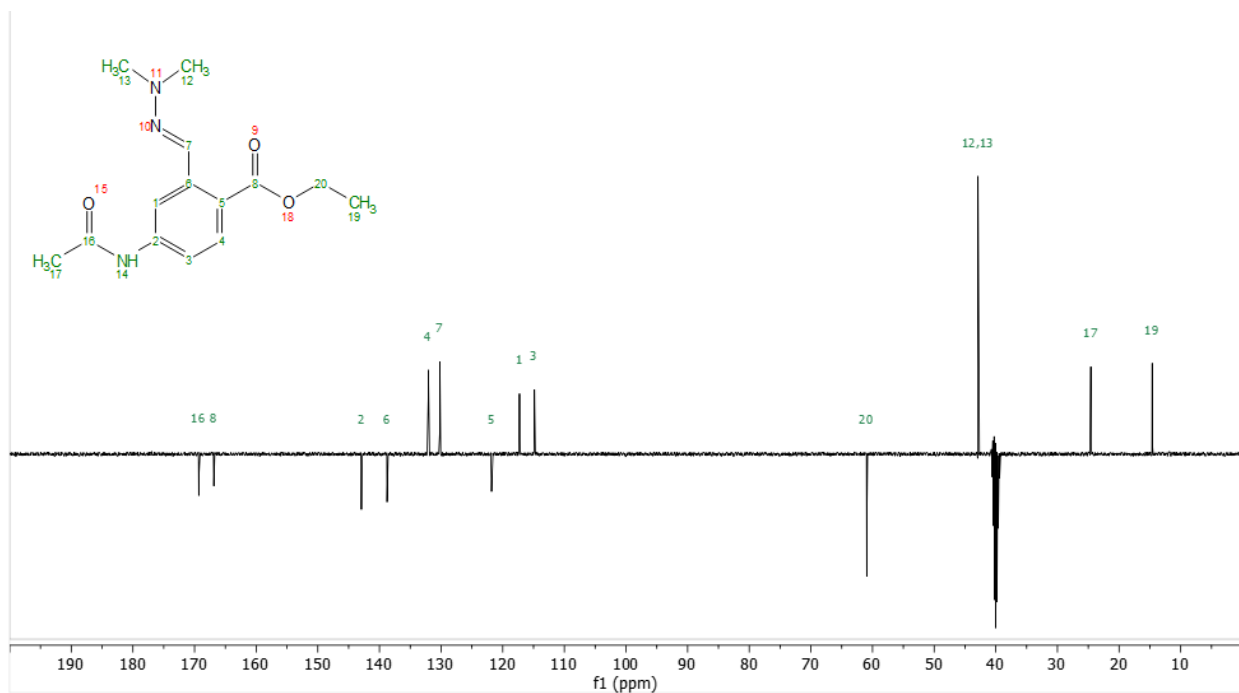

### IR

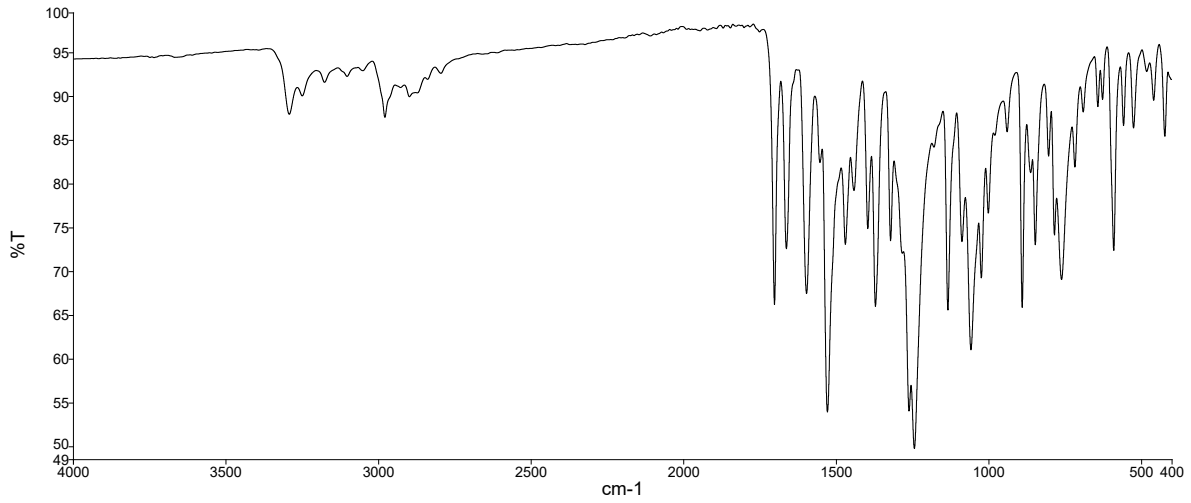

### DSC

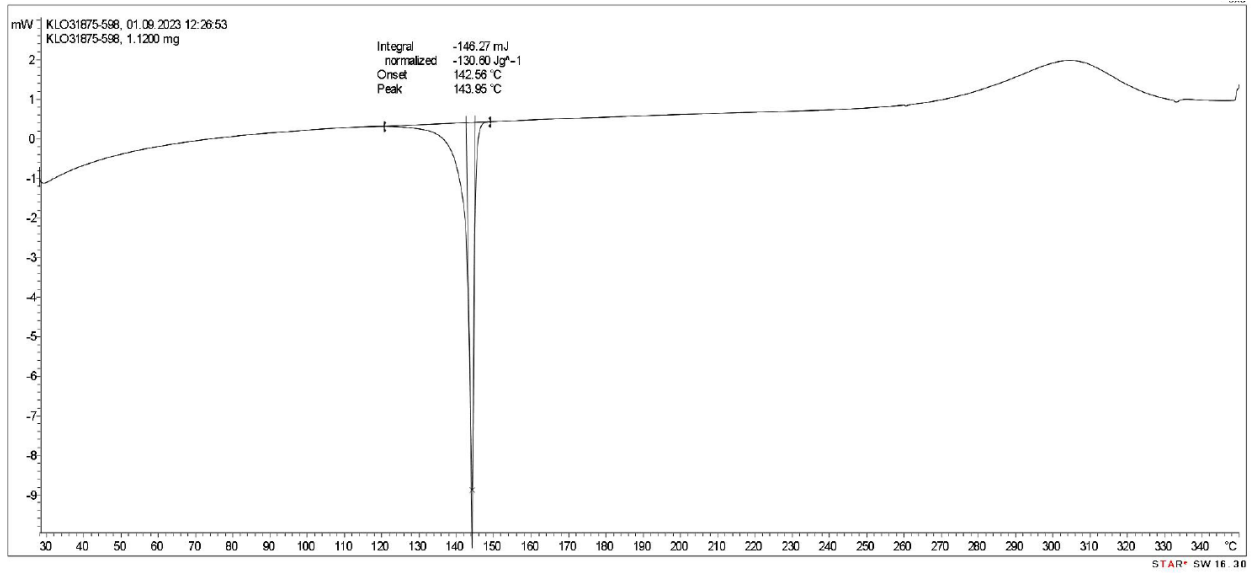

### HRMS

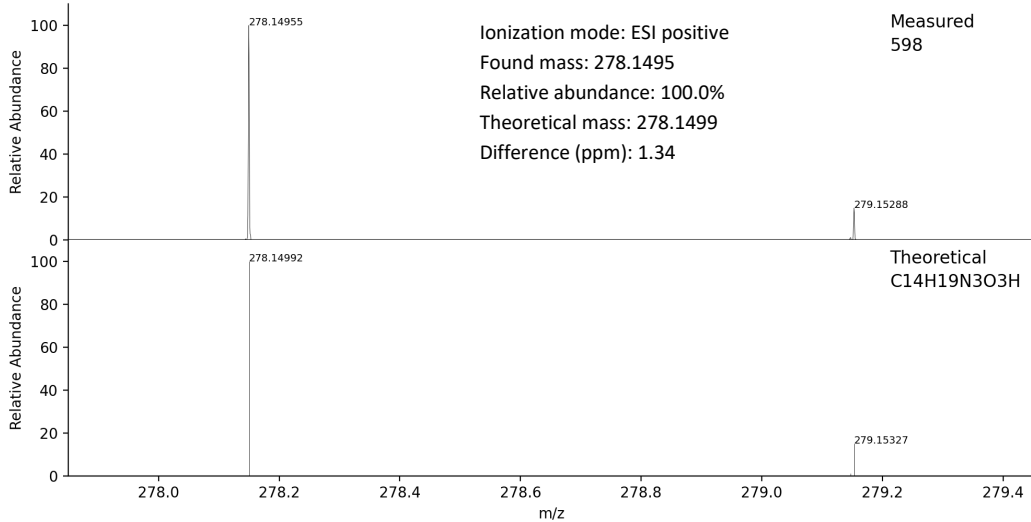

### S33. Spectra of 12

#### $^1\text{H-NMR}$ (DMSO- $d_6$ )

$^1\text{H-NMR}$  (400 MHz, DMSO- $d_6$ )  $\delta$  = 9.97 (s, 1H), 7.81 (s, 1H), 6.97 (s, 1H), 6.28 (s, 1H), 3.28 – 3.12 (m, 4H), 1.99 (s, 3H), 1.93 – 1.79 (m, 4H)

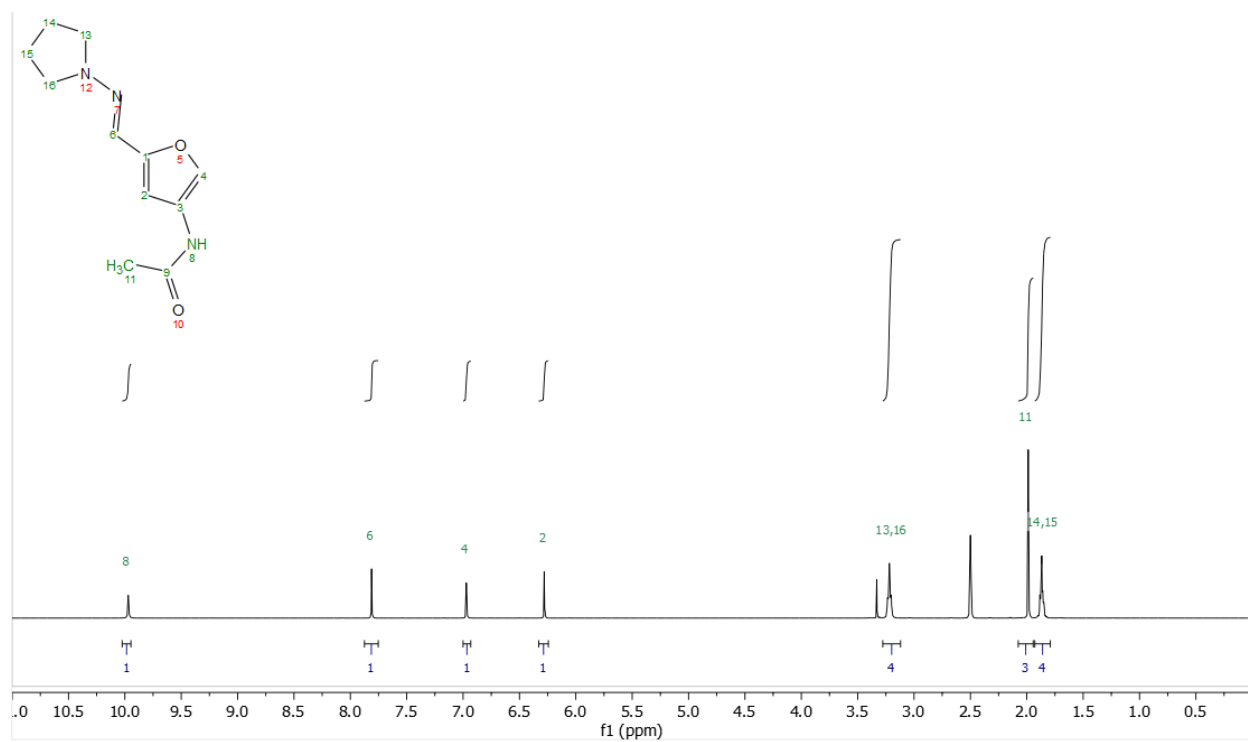

#### $^{13}\text{C-NMR}$ (DMSO- $d_6$ )

$^{13}\text{C-NMR}$  (101 MHz, DMSO- $d_6$ )  $\delta$  = 167.10, 150.51, 129.55, 126.45, 121.60, 99.91, 50.36, 23.04, 22.79

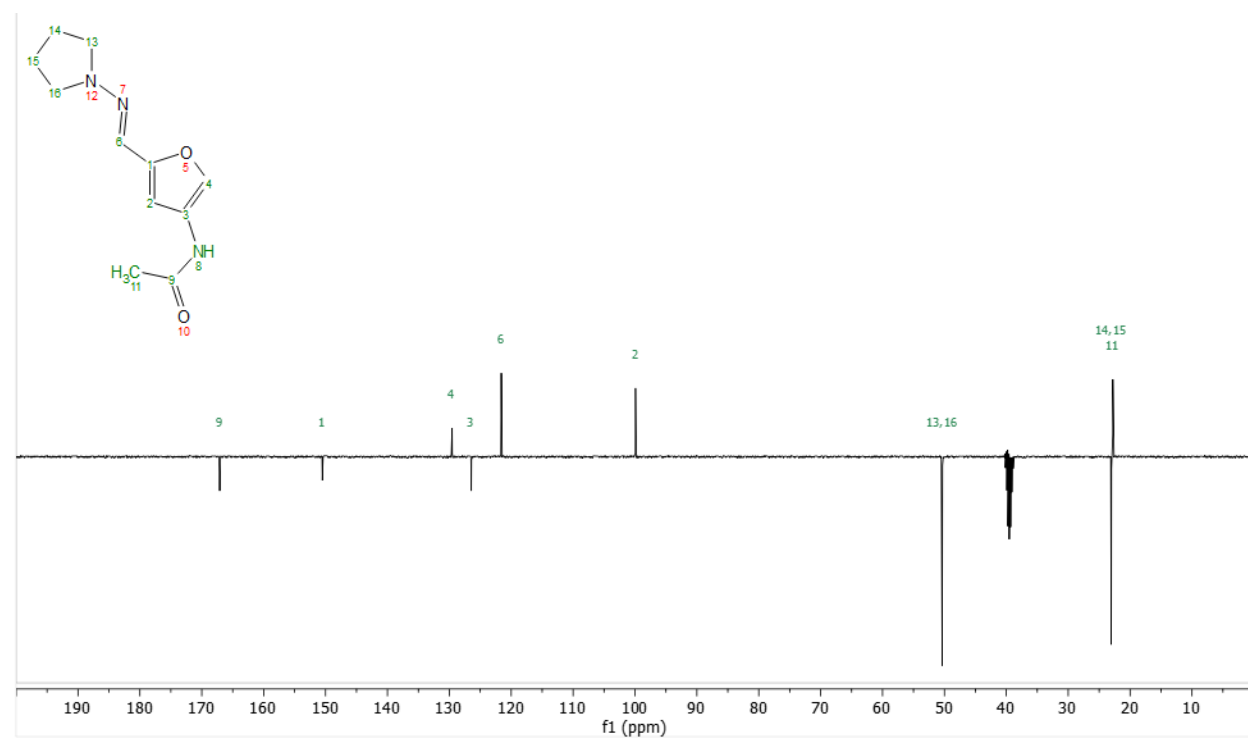

### IR

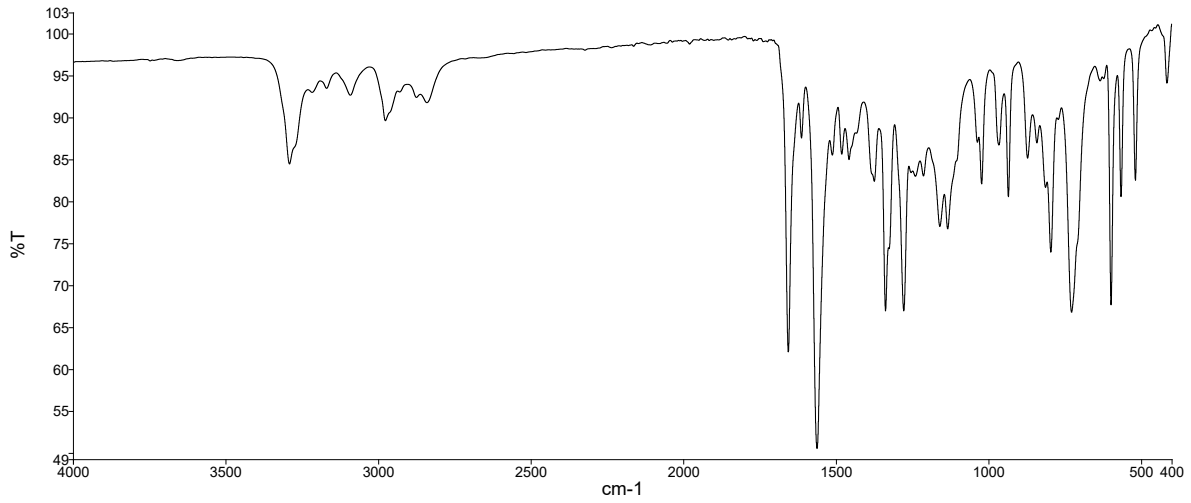

### DSC

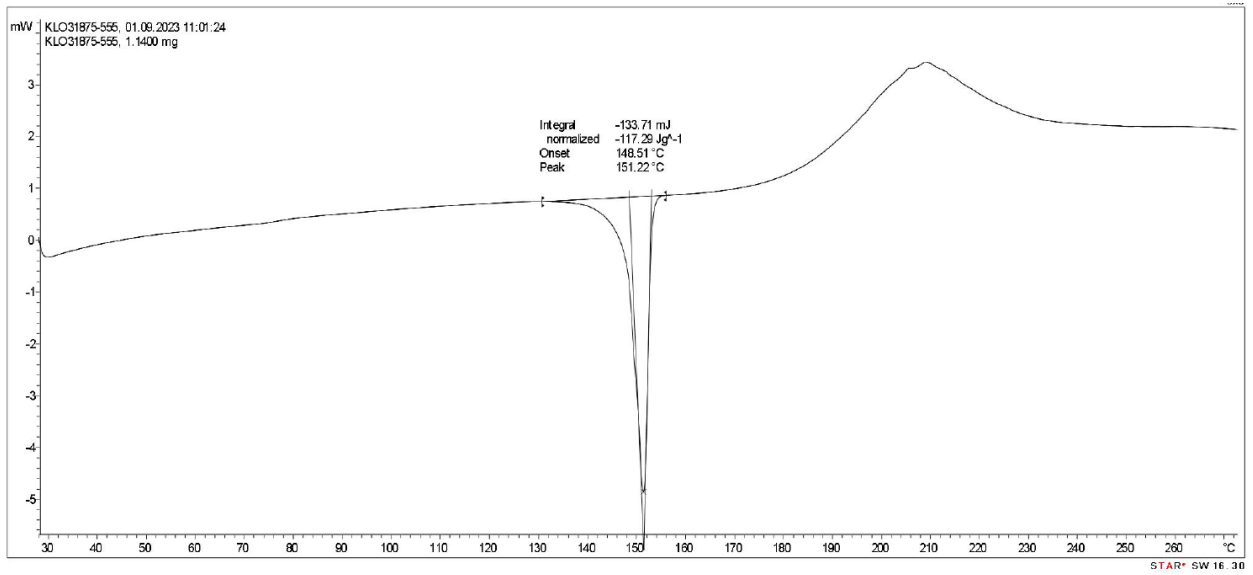

### HRMS

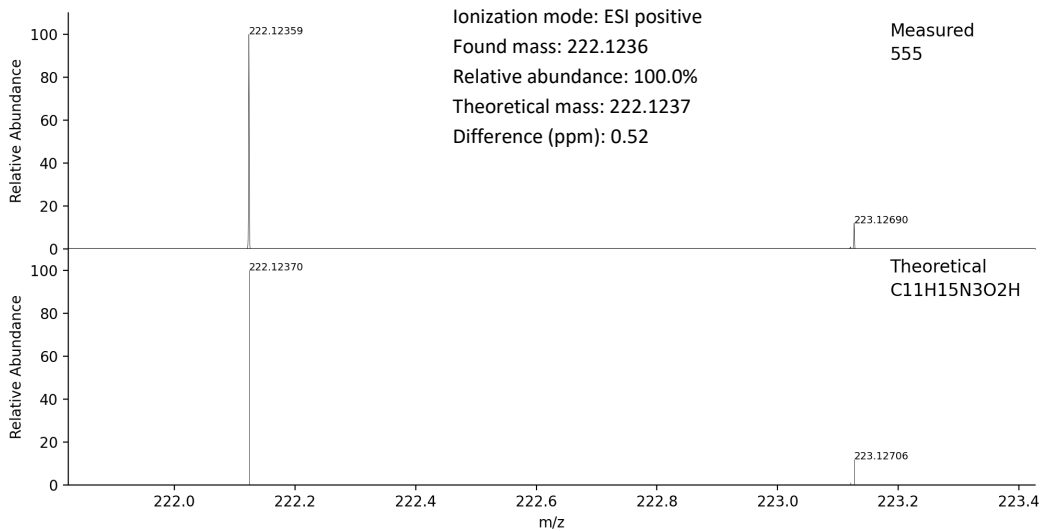

### S34. Spectra of 13

#### $^1\text{H-NMR}$ (DMSO- $d_6$ )

$^1\text{H-NMR}$  (400 MHz, DMSO- $d_6$ )  $\delta$  = 10.19 (s, 1H), 7.99 (d, 1H), 7.87 (s, 1H), 7.76 (d, 1H), 7.66 (dd, 1H), 4.26 (q, 2H), 3.38 – 3.26 (m, 4H), 2.05 (s, 2H), 1.95 – 1.86 (m, 3H), 1.30 (t, 3H)

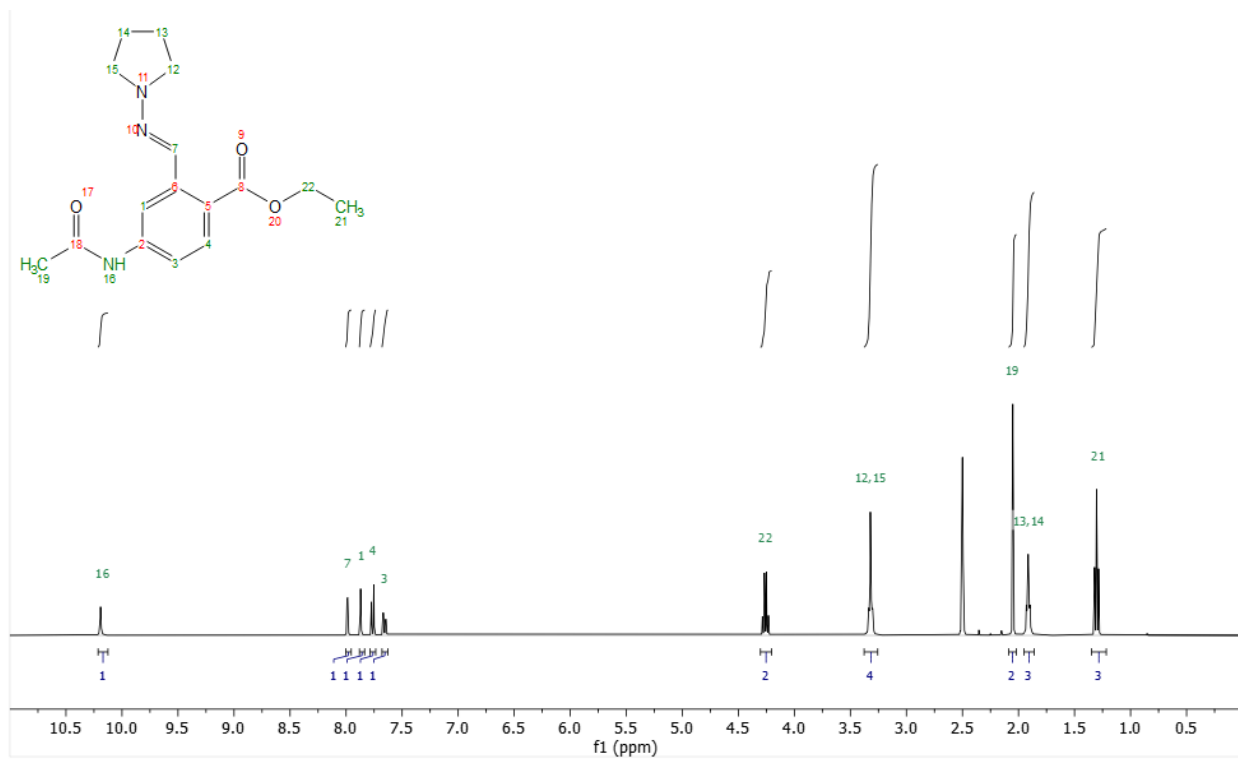

#### $^{13}\text{C-NMR}$ (DMSO- $d_6$ )

$^{13}\text{C-NMR}$  (101 MHz, DMSO- $d_6$ )  $\delta$  = 168.79, 142.41, 138.72, 131.61, 128.72, 120.82, 116.33, 113.76, 60.36, 50.40, 24.08, 23.15, 14.15

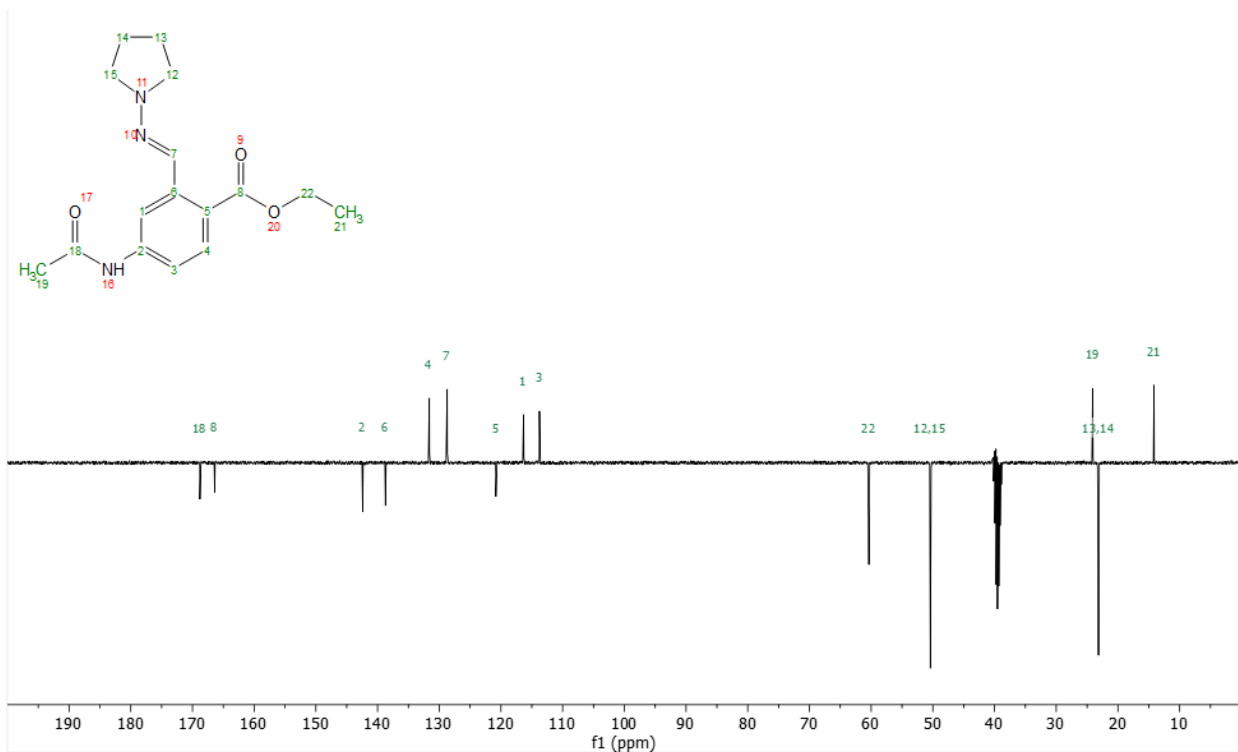

### IR

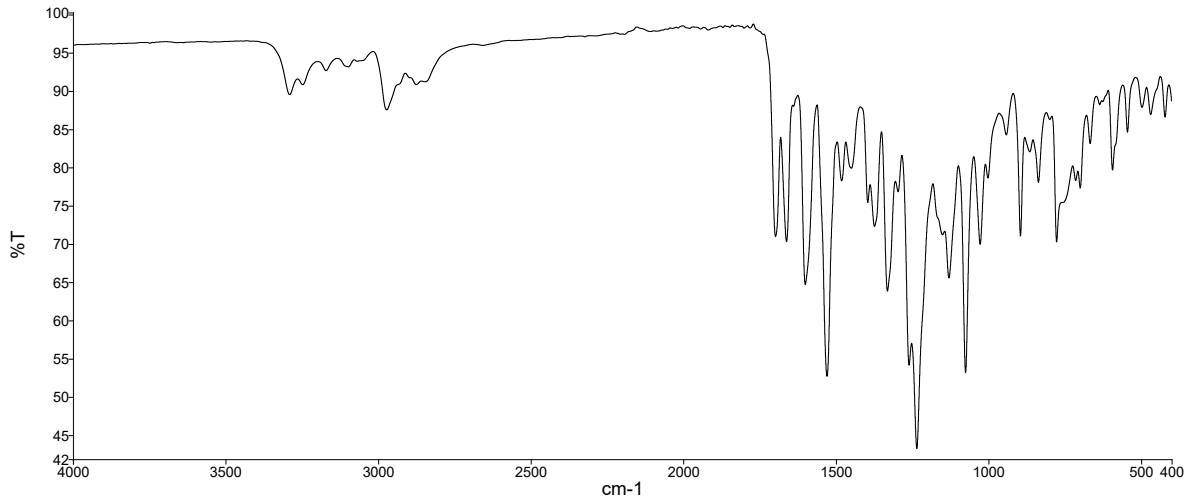

### DSC

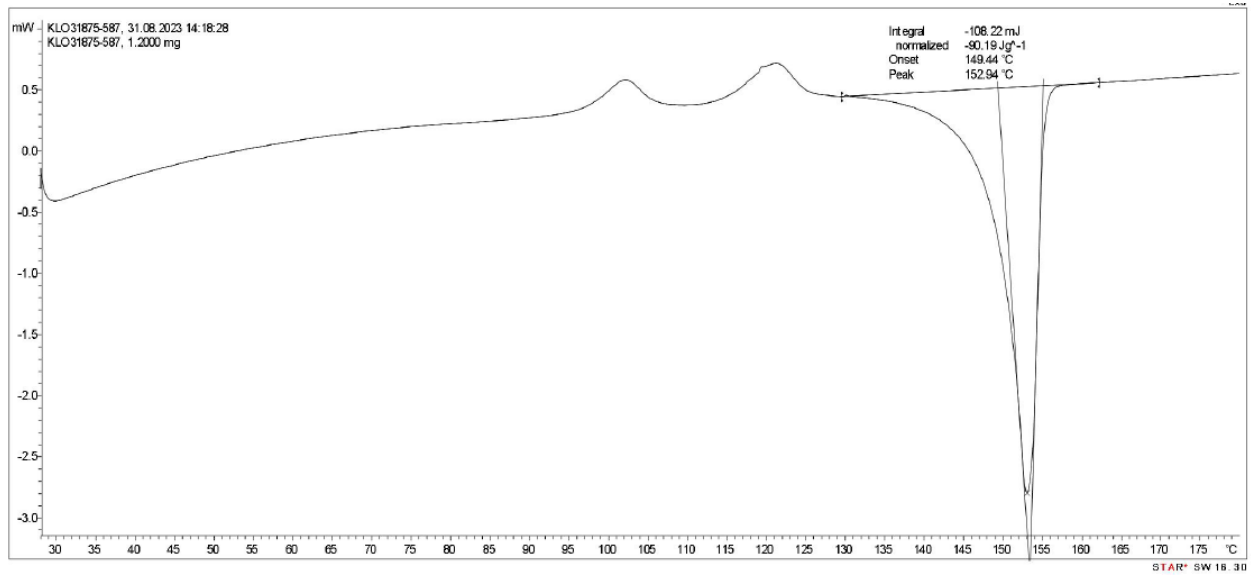

### HRMS

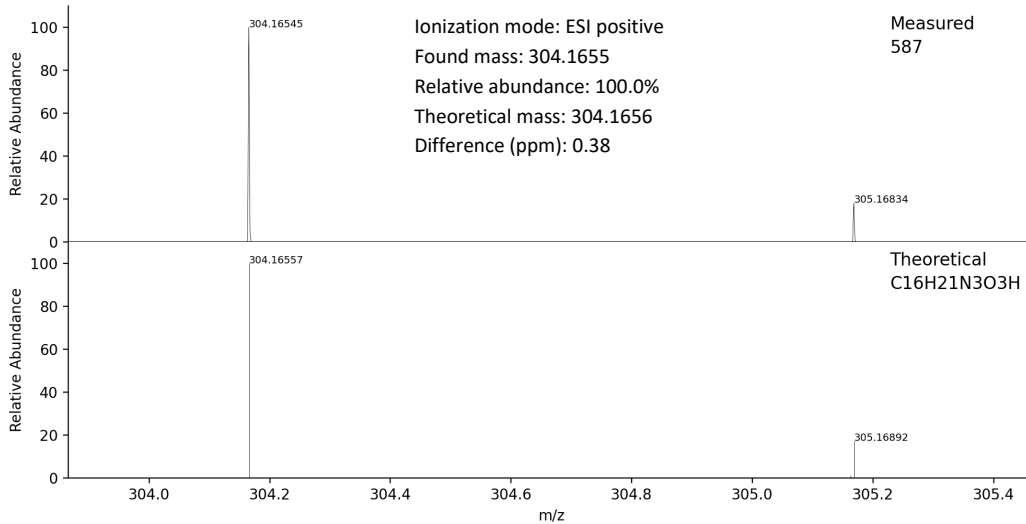

### S35. Spectra of 14

#### <sup>1</sup>H-NMR (DMSO-*d*<sub>6</sub>)

<sup>1</sup>H-NMR (400 MHz, DMSO-*d*<sub>6</sub>) δ = 10.41 (s, 1H), 8.01 (d, 1H), 7.98 (d, 1H), 7.72 (s, 1H), 3.41 – 3.34 (m, 4H), 2.95 (s, 3H), 2.08 (s, 3H), 1.99 – 1.92 (m, 4H)

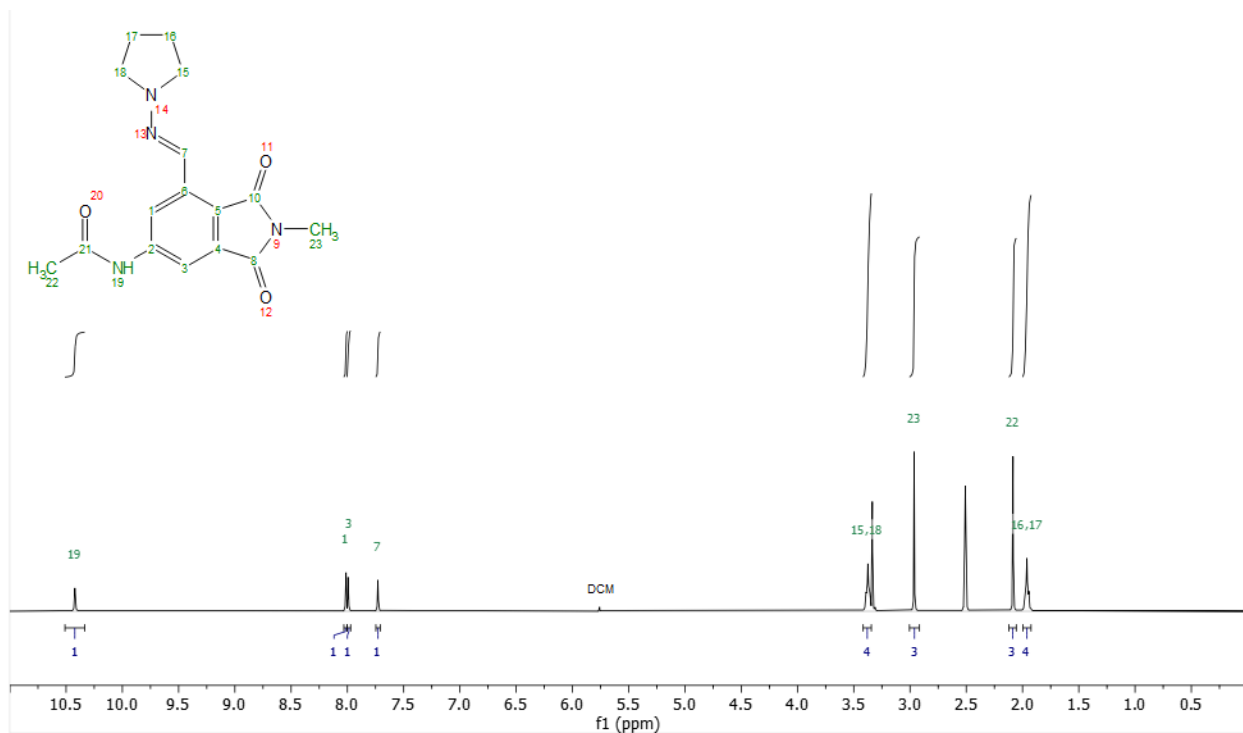

#### <sup>13</sup>C-NMR (DMSO-*d*<sub>6</sub>)

<sup>13</sup>C-NMR (101 MHz, DMSO-*d*<sub>6</sub>) δ = 169.13, 168.20, 167.69, 143.92, 136.58, 133.72, 122.65, 118.32, 115.25, 110.57, 50.20, 24.14, 23.38

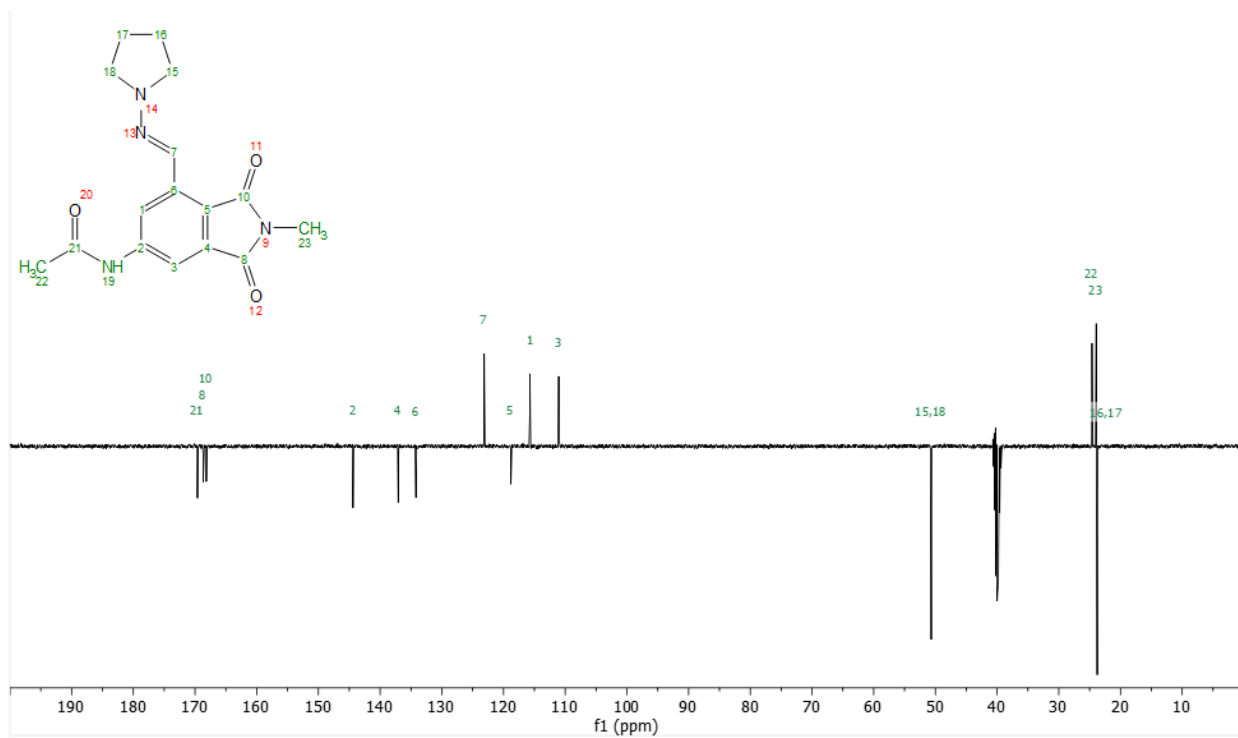



### IR

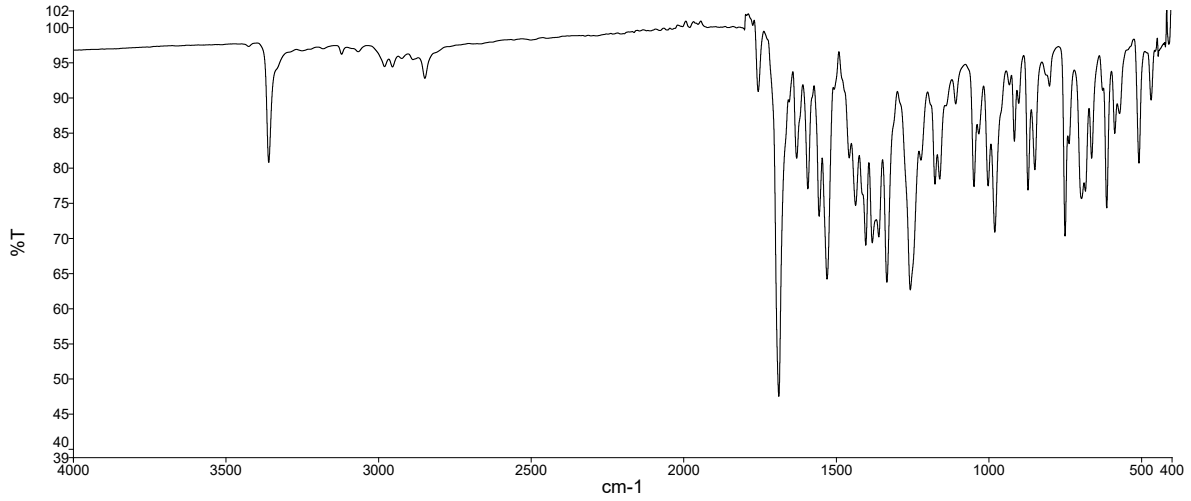

### DSC

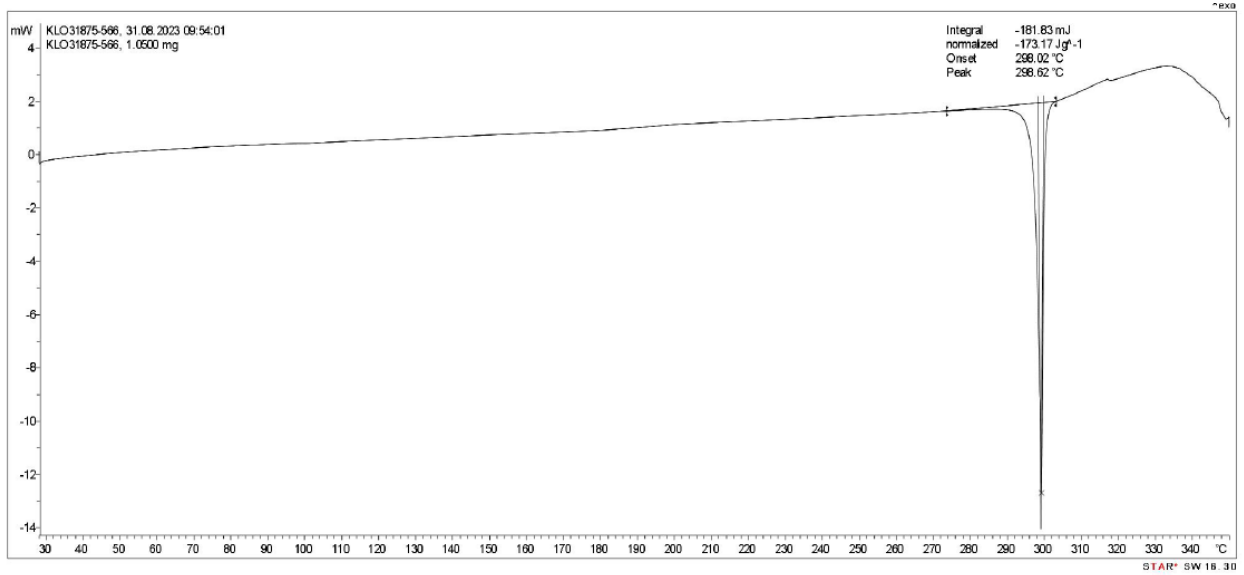

### HRMS

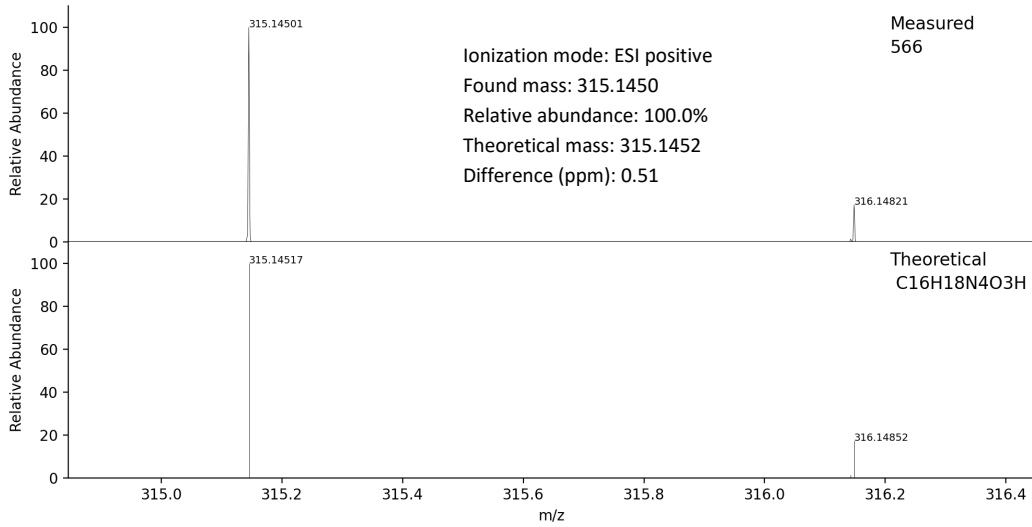

### S36. Spectra of 15

#### <sup>1</sup>H-NMR (DMSO-*d*<sub>6</sub>)

<sup>1</sup>H-NMR (400 MHz, DMSO-*d*<sub>6</sub>) δ = 10.49 (s, 1H), 8.11 (d, 1H), 8.06 (d, 1H), 7.80 (s, 1H), 7.37 – 7.21 (m, 5H), 4.71 (s, 2H), 3.43 – 3.36 (m, 4H), 2.09 (s, 3H), 1.99 – 1.90 (m, 4H)

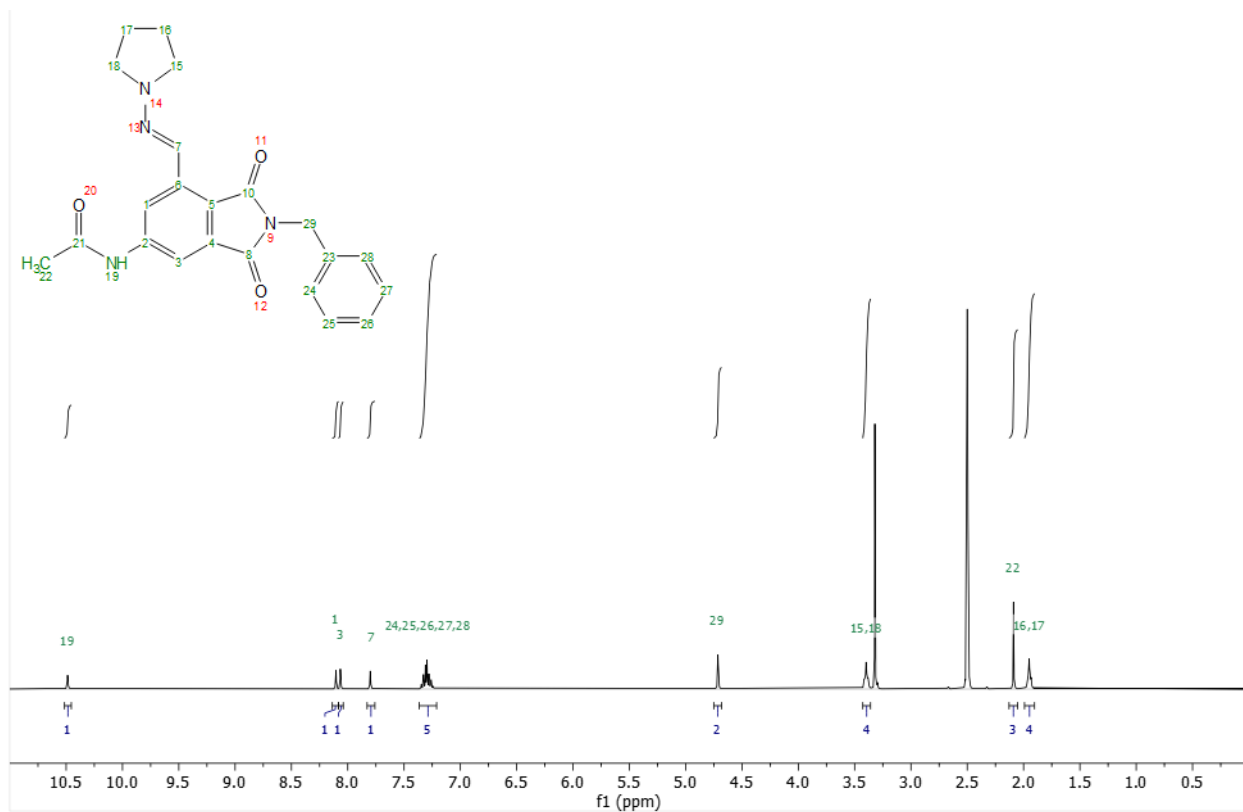

#### <sup>13</sup>C-NMR (DMSO-*d*<sub>6</sub>)

<sup>13</sup>C-NMR (101 MHz, DMSO-*d*<sub>6</sub>) δ = 169.23, 144.21, 137.06, 136.89, 133.57, 128.57, 127.39 (d), 122.42, 117.94, 115.64, 110.90, 50.27, 40.70, 24.16, 23.32

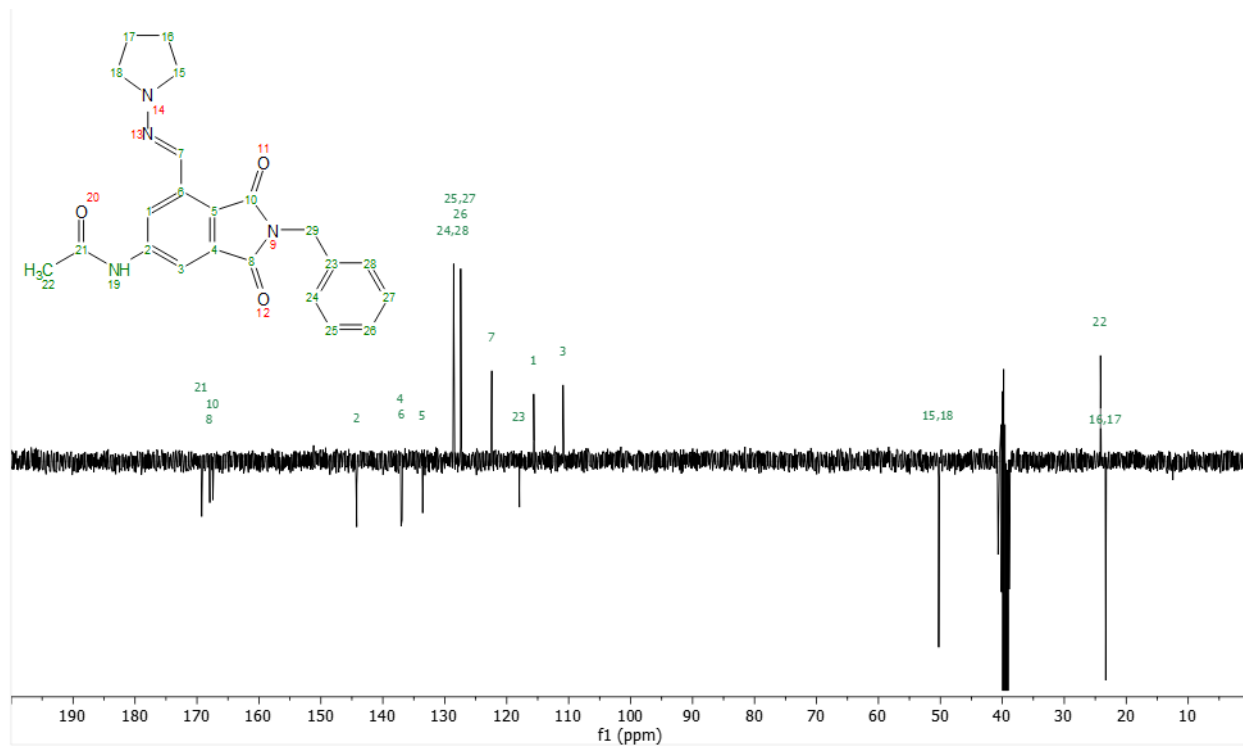

### IR

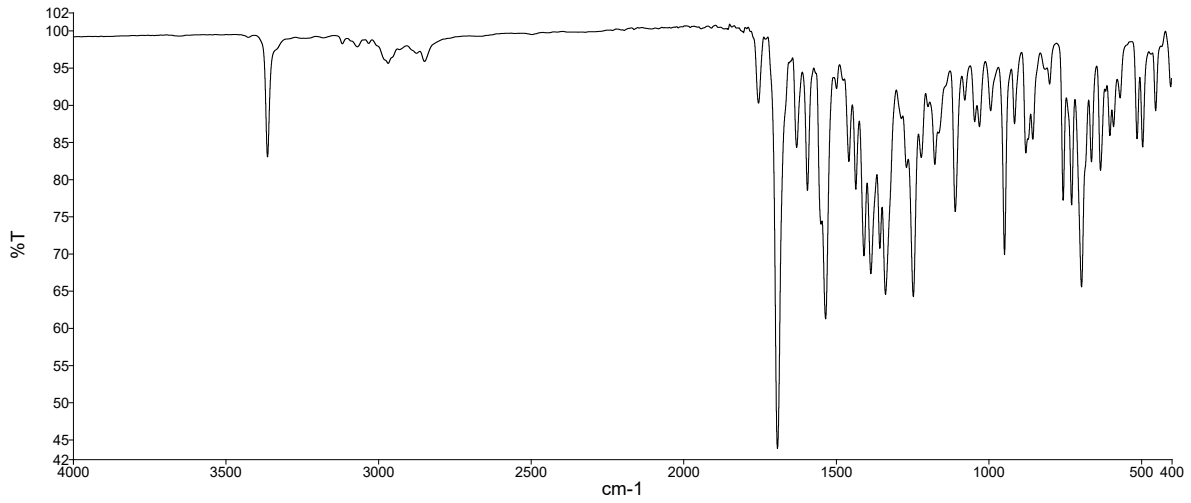

### DSC

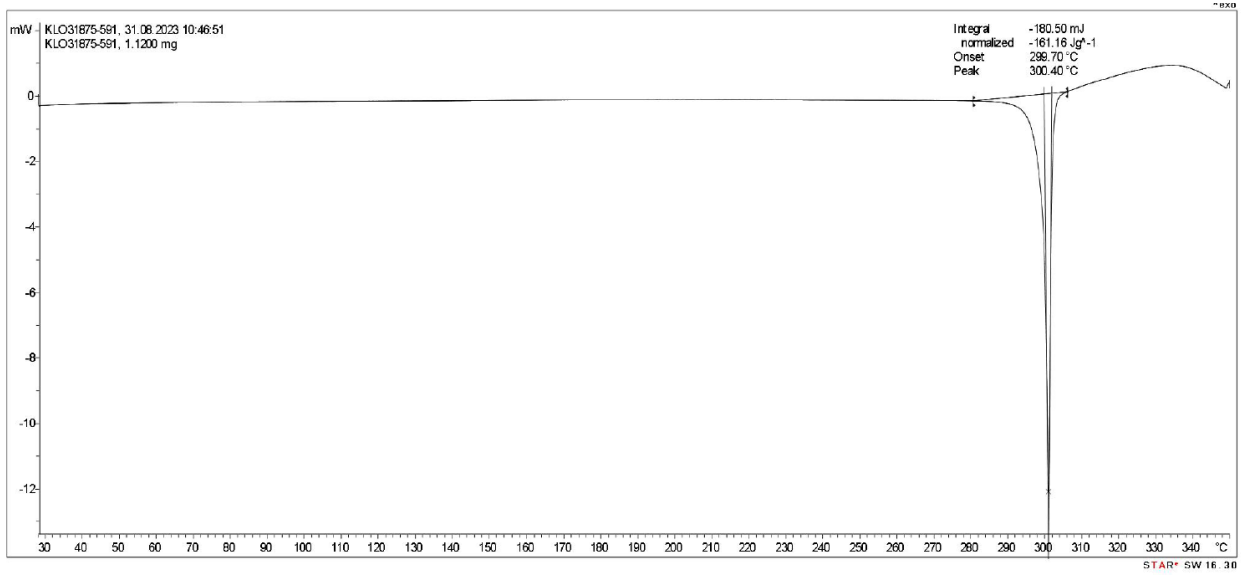

### HRMS

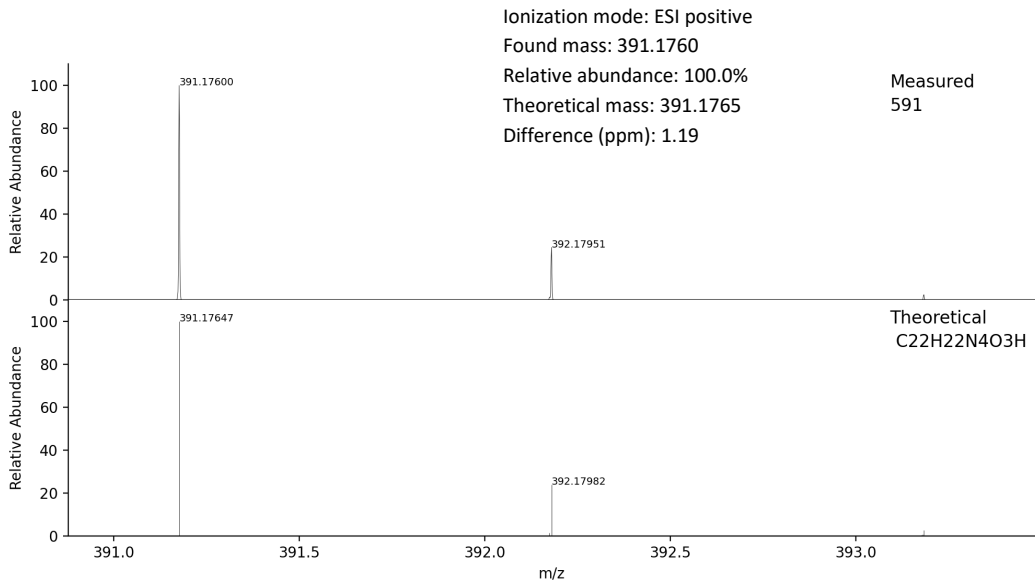

### S37. Spectra of 16

#### <sup>1</sup>H-NMR (DMSO-*d*<sub>6</sub>)

<sup>1</sup>H-NMR (400 MHz, DMSO-*d*<sub>6</sub>) δ = 10.52 (s, 1H), 8.16 (d, 1H), 8.13 (d, 1H), 7.85 (s, 1H), 7.55 – 7.46 (m, 2H), 7.42 (dt, 3H), 3.46 – 3.35 (m, 4H), 2.11 (s, 3H), 2.01 – 1.94 (m, 4H)

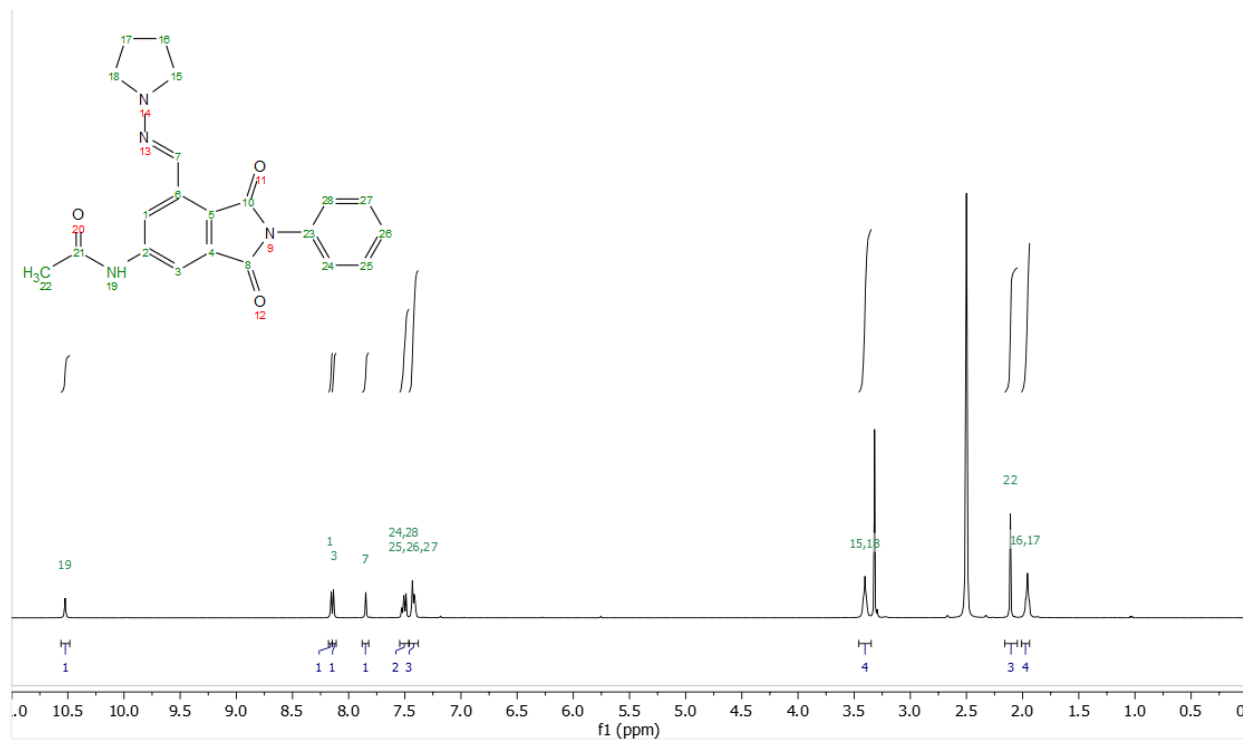

#### <sup>13</sup>C-NMR (DMSO-*d*<sub>6</sub>)

<sup>13</sup>C-NMR (101 MHz, DMSO-*d*<sub>6</sub>) δ = 169.28, 167.20, 166.69, 144.32, 137.26, 133.57, 131.99, 128.73, 127.85, 127.34, 122.50, 117.90, 115.82, 110.94, 50.28, 24.19, 23.32

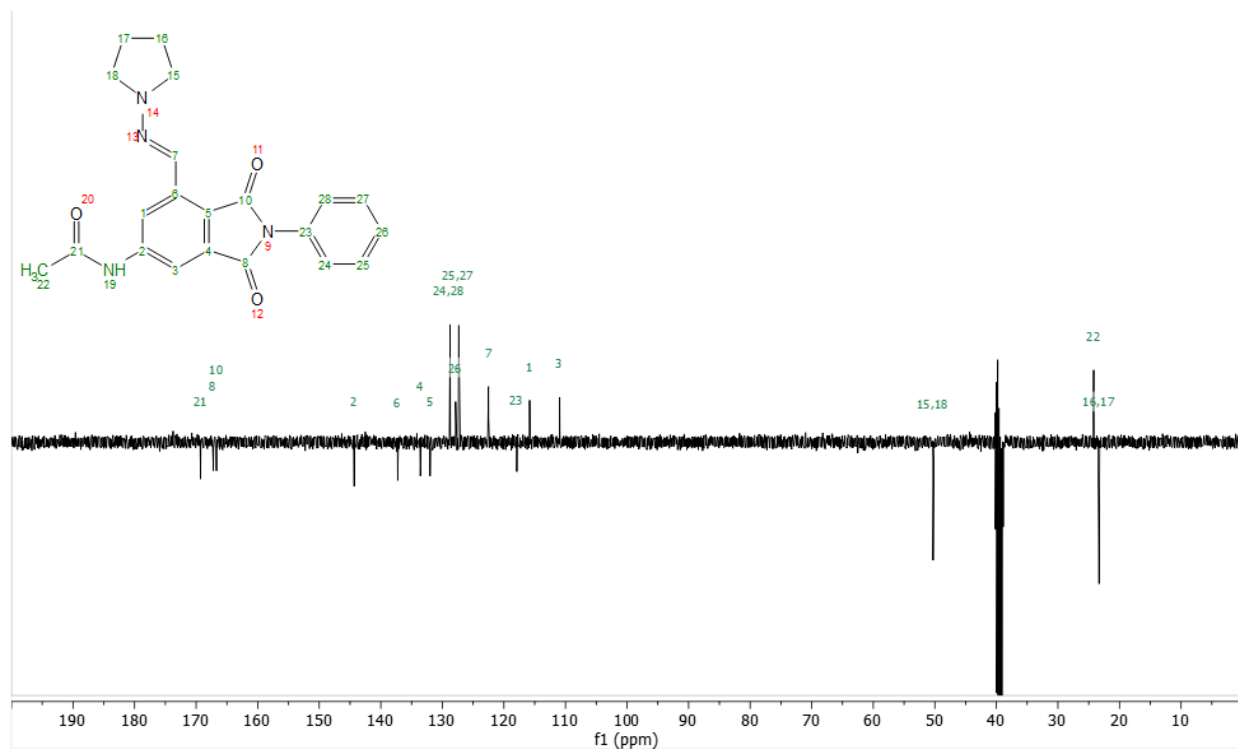

### IR

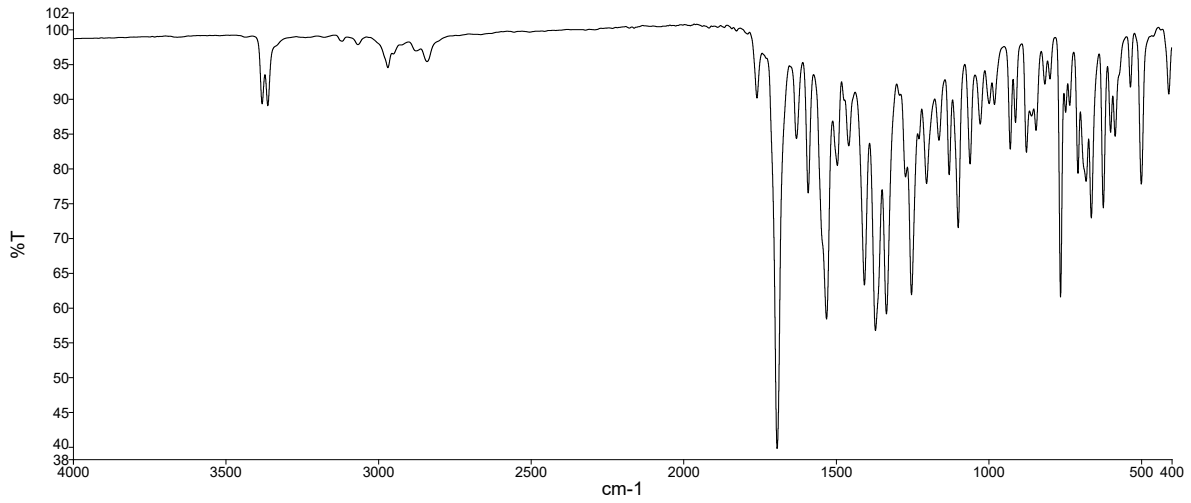

### DSC

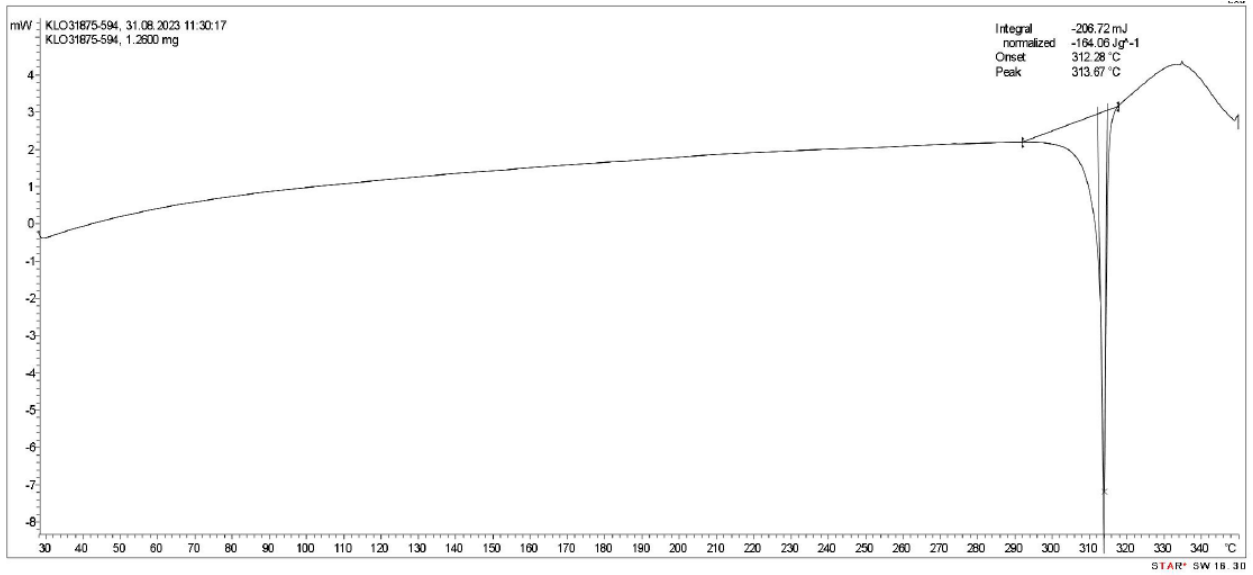

### HRMS

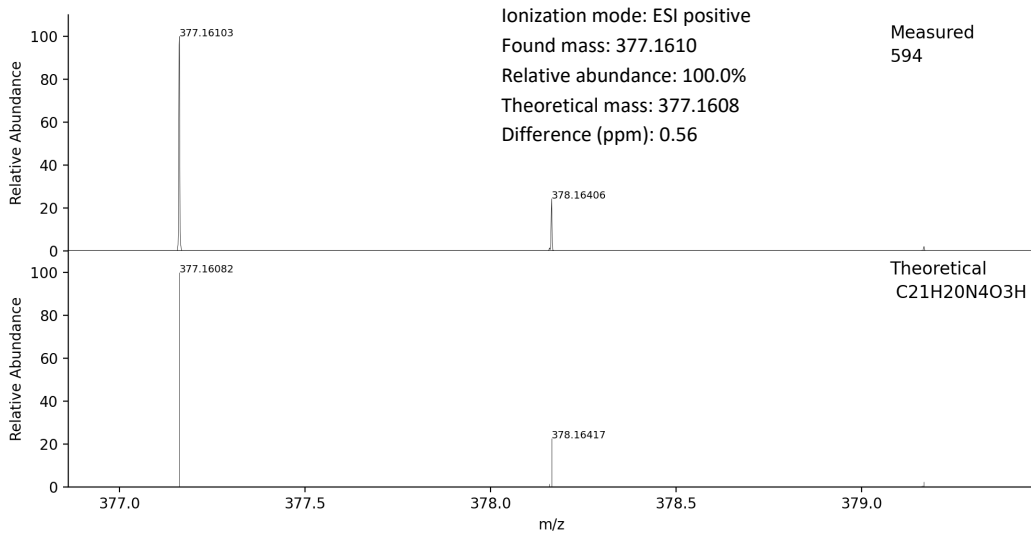

### S38. Spectra of 17

#### <sup>1</sup>H-NMR (DMSO-*d*<sub>6</sub>)

<sup>1</sup>H-NMR (400 MHz, DMSO-*d*<sub>6</sub>) δ = 10.27 (s, 1H), 8.08 (s, 2H), 6.92 (s, 1H), 3.81 (s, 3H), 3.78 (s, 3H), 3.32 – 3.26 (m, 4H), 2.06 (s, 3H), 1.94 – 1.86 (m, 4H)

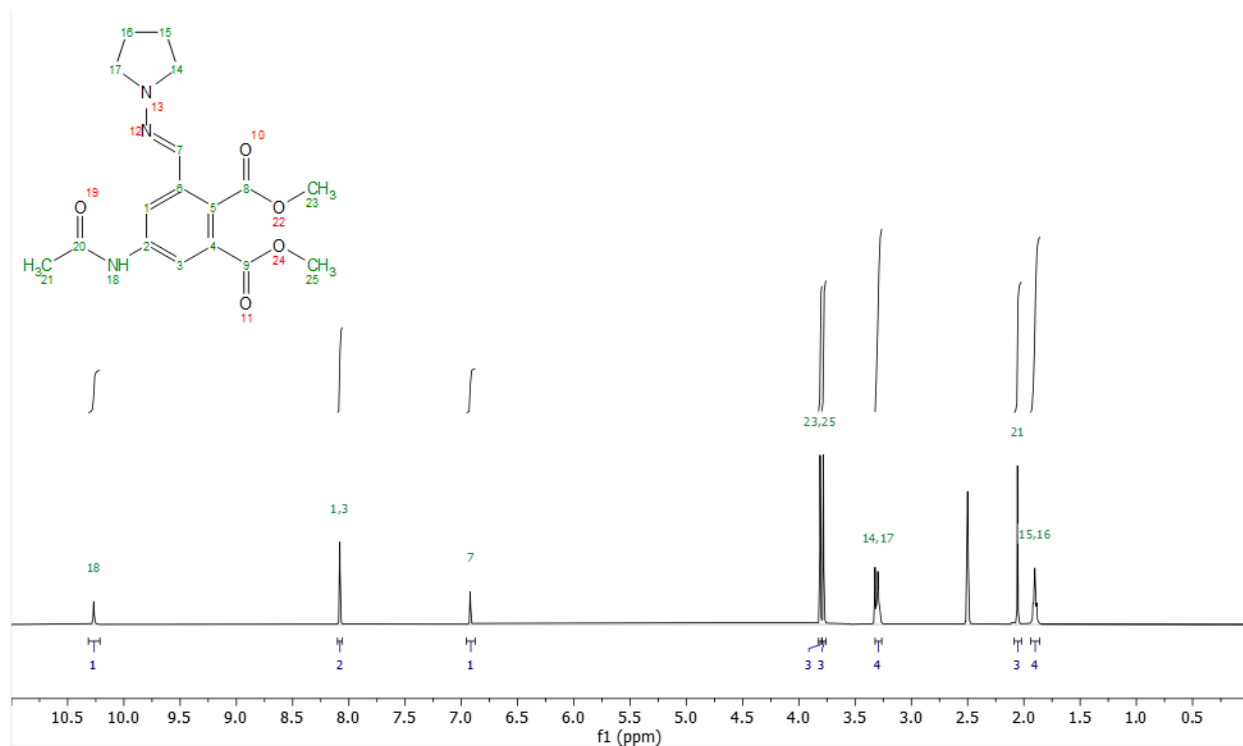

#### <sup>13</sup>C-NMR (DMSO-*d*<sub>6</sub>)

<sup>13</sup>C-NMR (101 MHz, DMSO-*d*<sub>6</sub>) δ = 168.87, 168.19, 165.95, 140.12, 135.70, 129.31, 124.75, 117.40, 117.07, 52.61, 52.26, 50.21, 24.03, 23.16

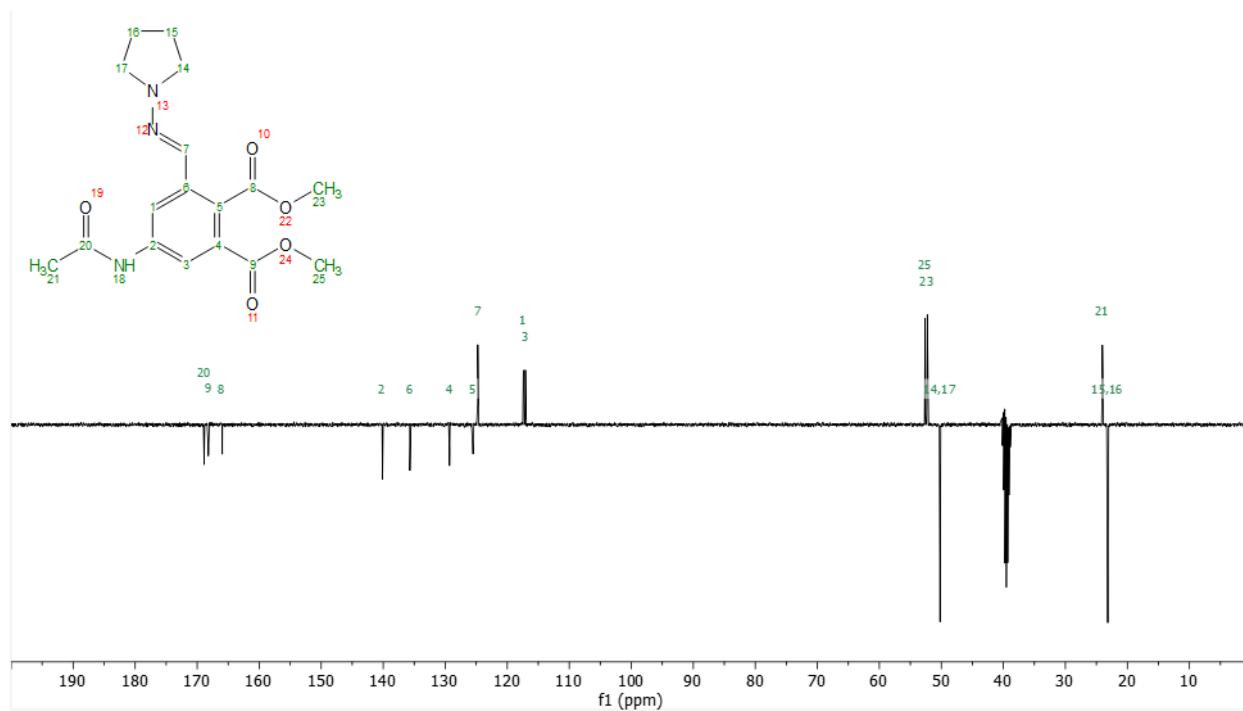

### IR

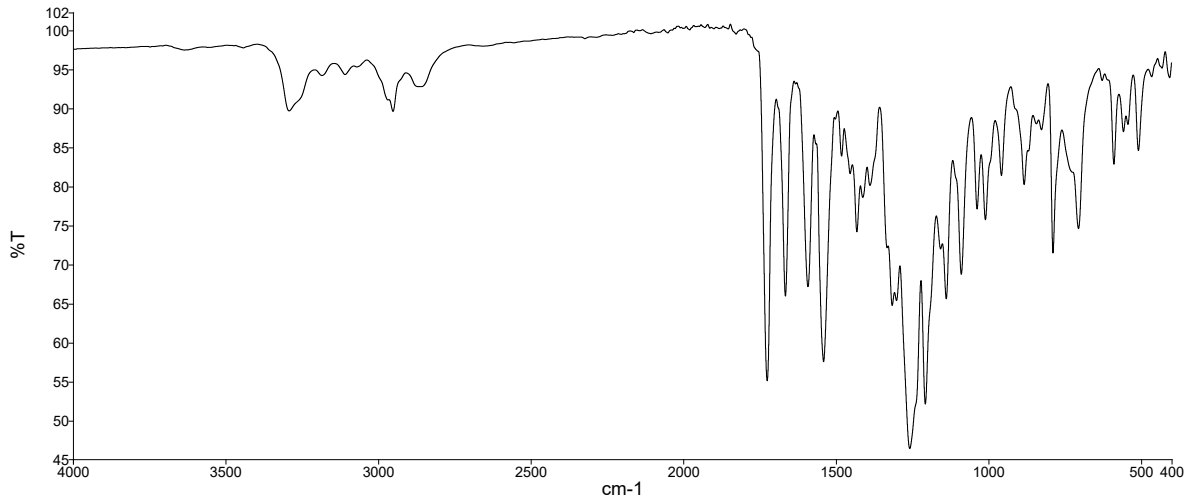

### DSC

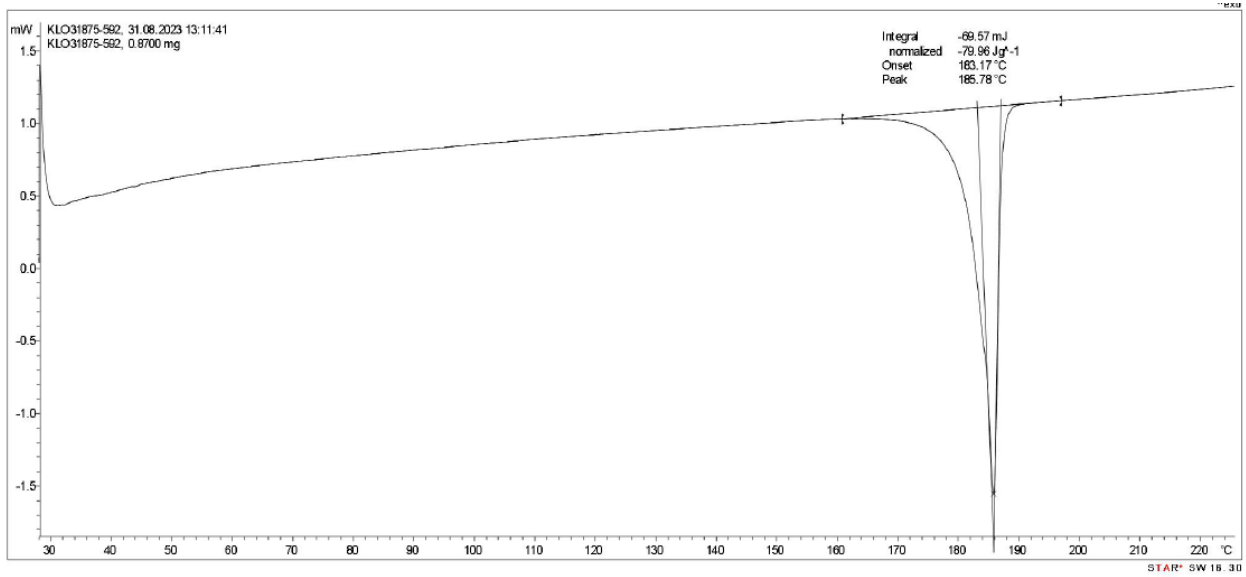

### HRMS

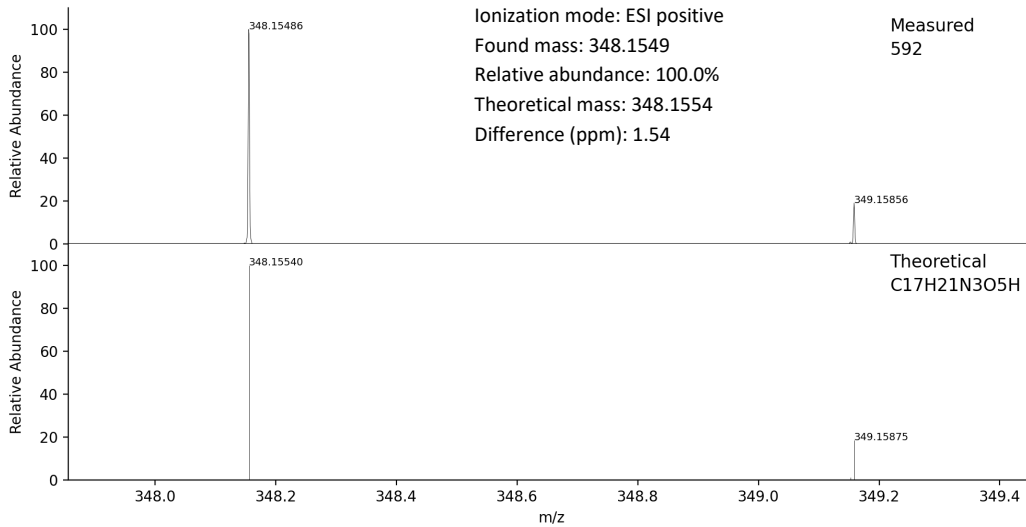

### S39. Spectra of 18

#### $^1\text{H-NMR}$ (DMSO- $d_6$ )

$^1\text{H-NMR}$  (400 MHz, DMSO- $d_6$ )  $\delta$  = 10.57 (s, 1H), 8.06 (d, 1H), 8.03 (d, 1H), 6.97 (s, 1H), 3.51 – 3.37 (m, 4H), 2.08 (s, 3H), 2.01 – 1.88 (m, 4H)

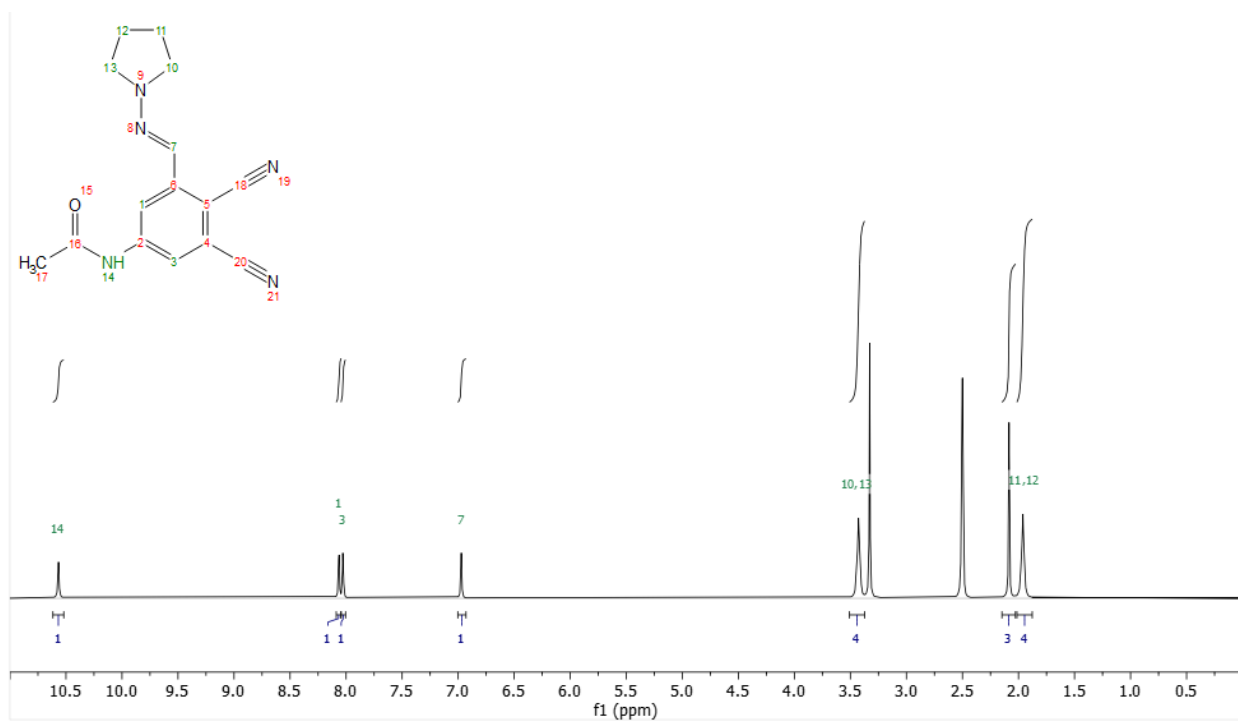

#### $^{13}\text{C-NMR}$ (DMSO- $d_6$ )

$^{13}\text{C-NMR}$  (101 MHz, DMSO- $d_6$ )  $\delta$  = 169.63, 143.04, 142.81, 121.26, 120.27, 116.29, 115.90, 115.67, 115.34, 102.56, 50.33, 24.23, 23.40

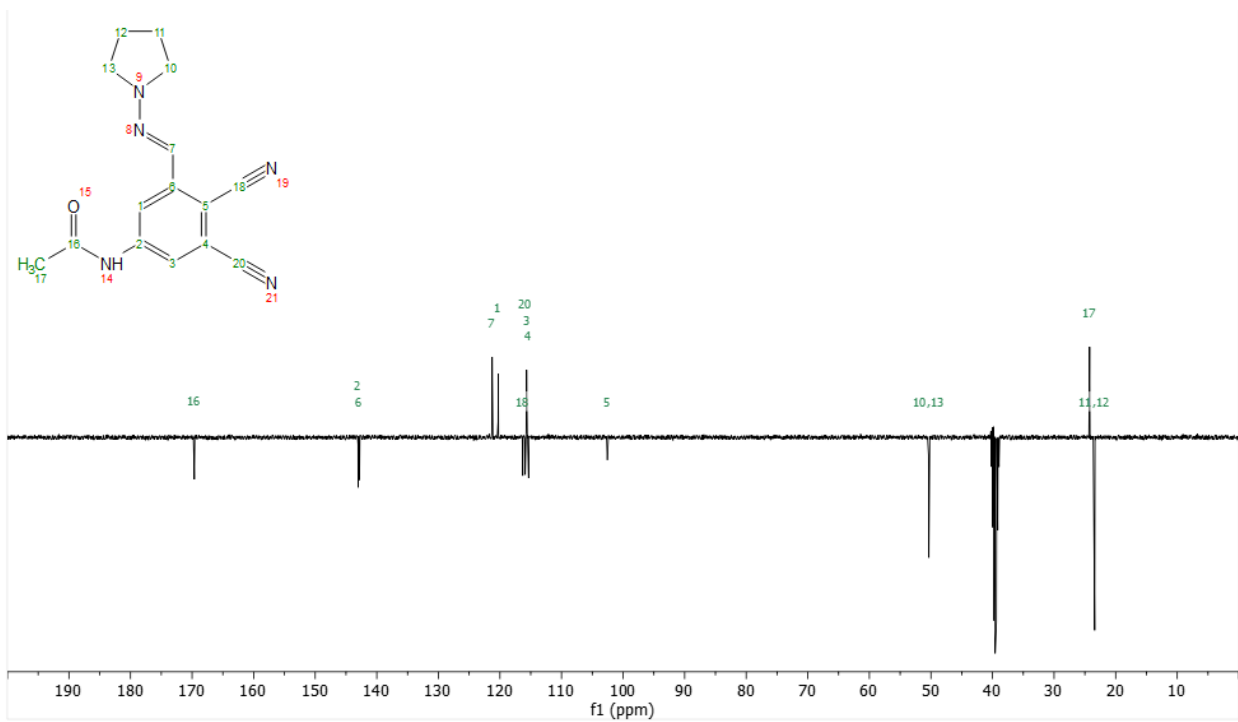



### IR

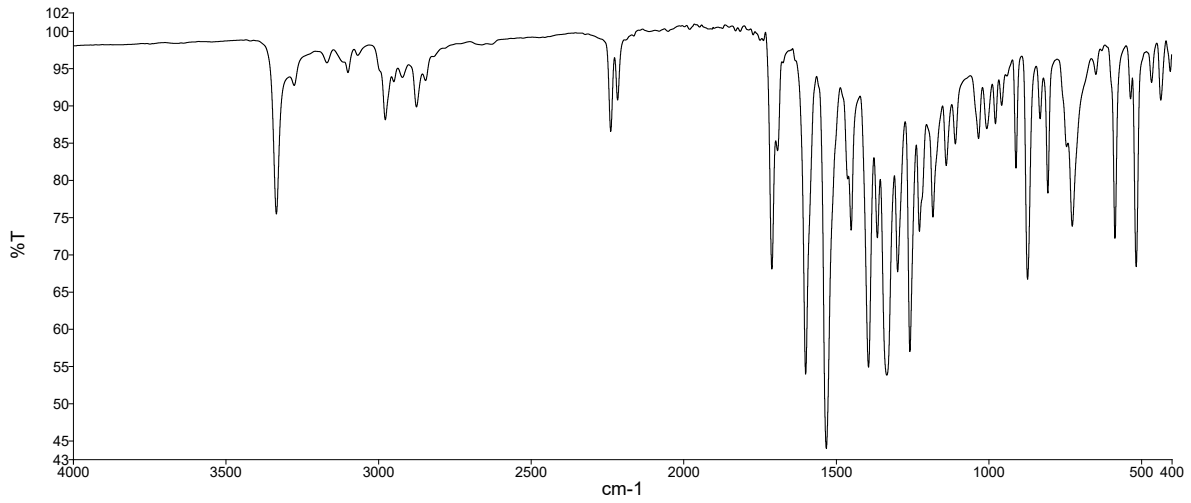

### DSC

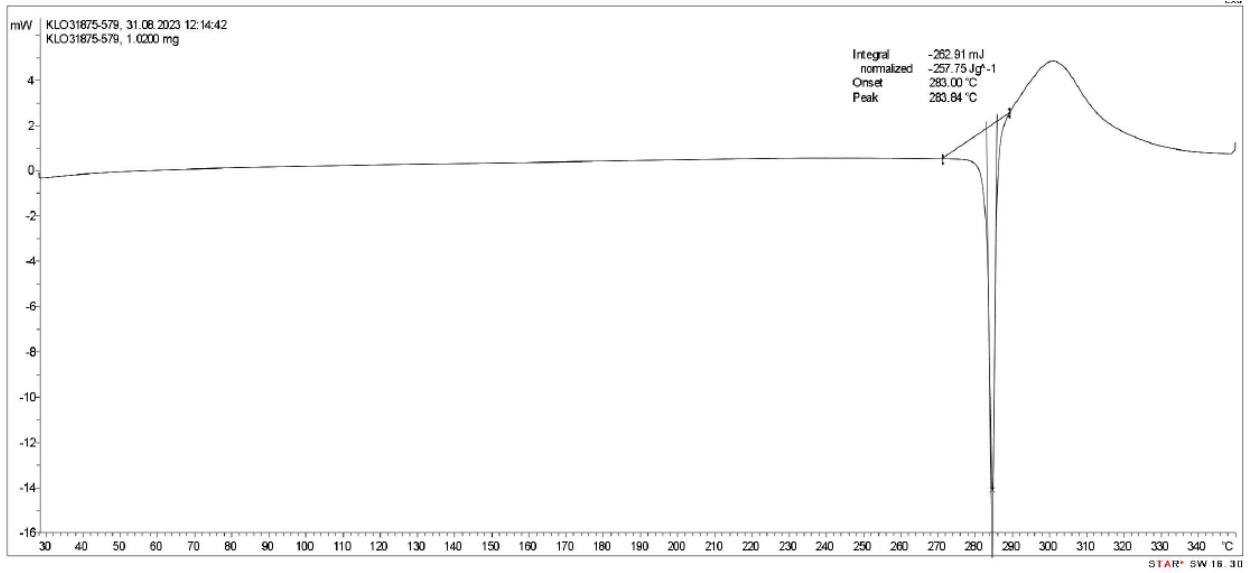

### HRMS

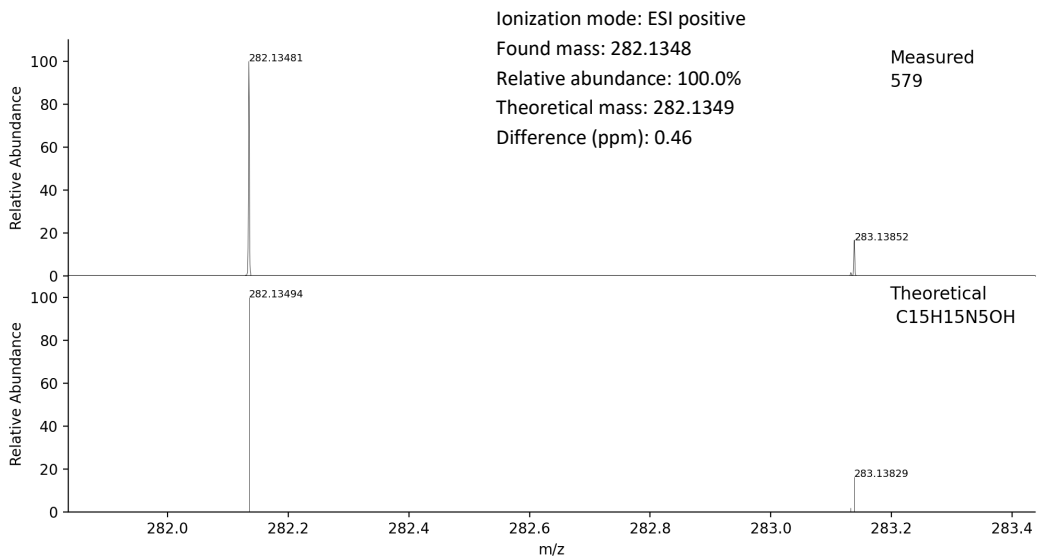

## S40. Spectra of 19

### $^1\text{H-NMR}$ (DMSO- $d_6$ )

$^1\text{H-NMR}$  (400 MHz, DMSO- $d_6$ )  $\delta$  = 10.28 (s, 1H), 7.99 (d, 1H), 7.63 (dd, 1H), 7.59 (dd, 1H), 7.10 (s, 1H), 3.42 – 3.34 (m, 4H), 2.06 (s, 3H), 1.98 – 1.85 (m, 4H)

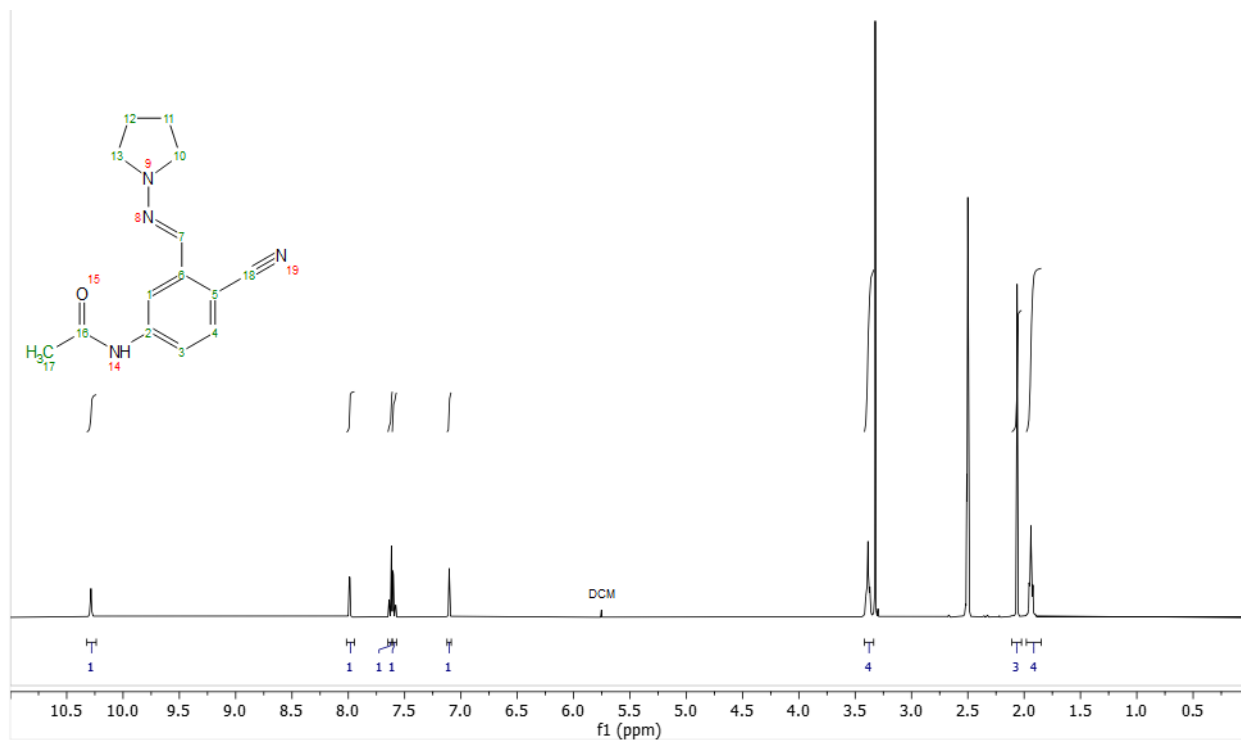

### $^{13}\text{C-NMR}$ (DMSO- $d_6$ )

$^{13}\text{C-NMR}$  (101 MHz, DMSO- $d_6$ )  $\delta$  = 169.04, 143.17, 140.87, 133.87, 123.65, 118.11, 116.66, 112.51, 101.23, 50.22, 24.15, 23.28

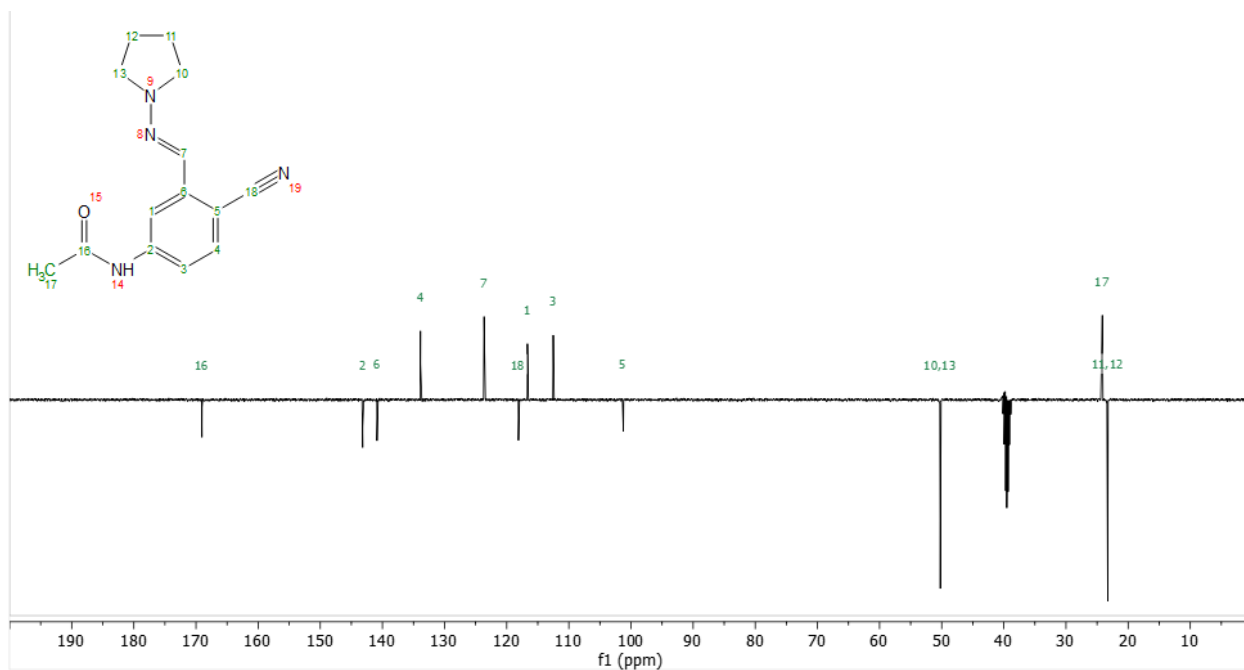

### IR

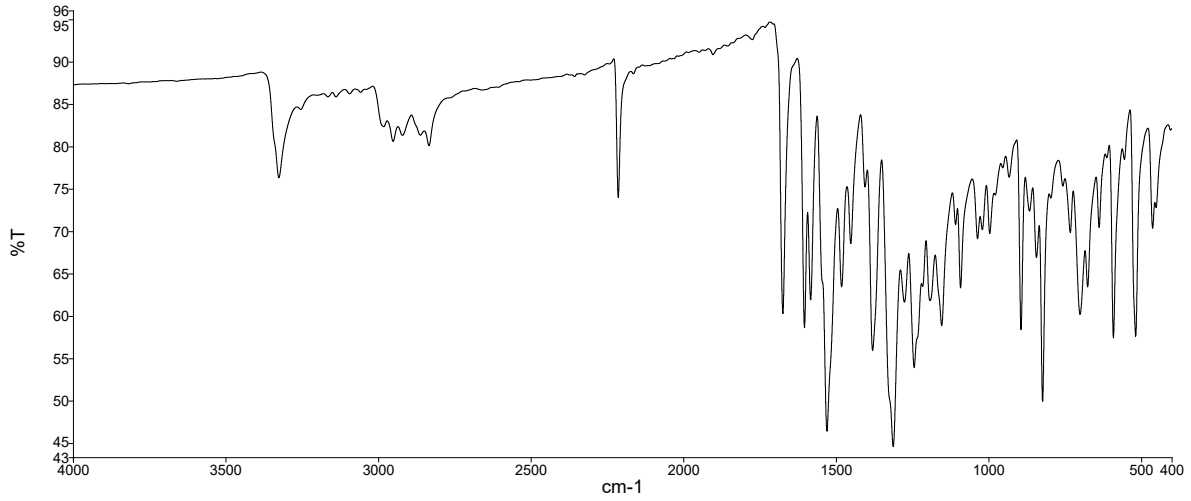

### DSC

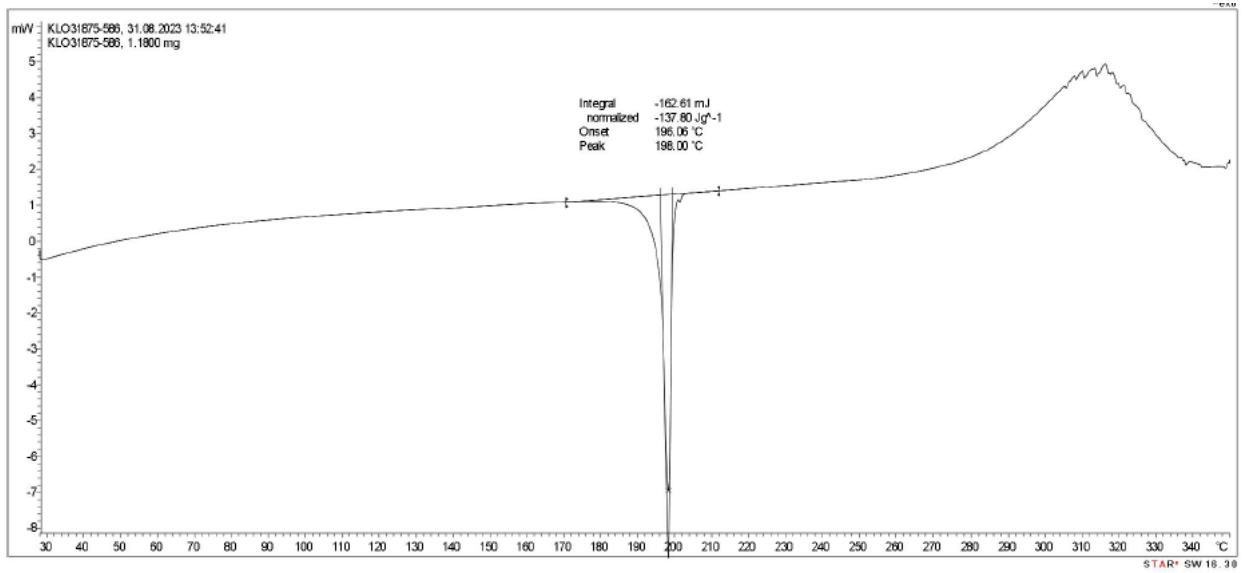

### HRMS

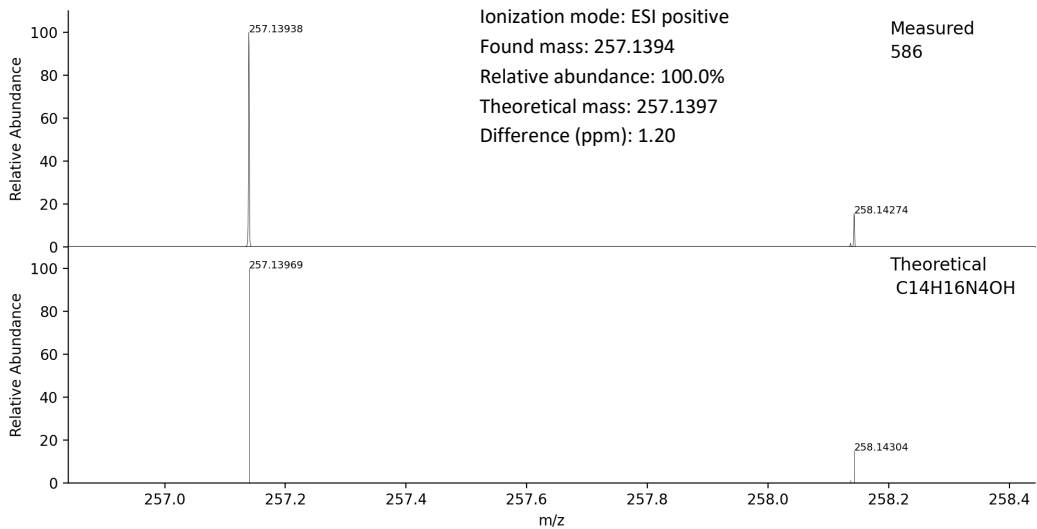

## S41. Spectra of 20

### <sup>1</sup>H-NMR (DMSO-*d*<sub>6</sub>)

<sup>1</sup>H-NMR (400 MHz, DMSO-*d*<sub>6</sub>) δ = 10.16 (s, 1H), 7.97 (d, 1H), 7.81 (s, 1H), 7.69 (d, 1H), 7.63 (dd, 1H), 3.32 – 3.29 (m, 4H), 2.04 (s, 3H), 1.95 – 1.88 (m, 4H), 1.53 (s, 8H)

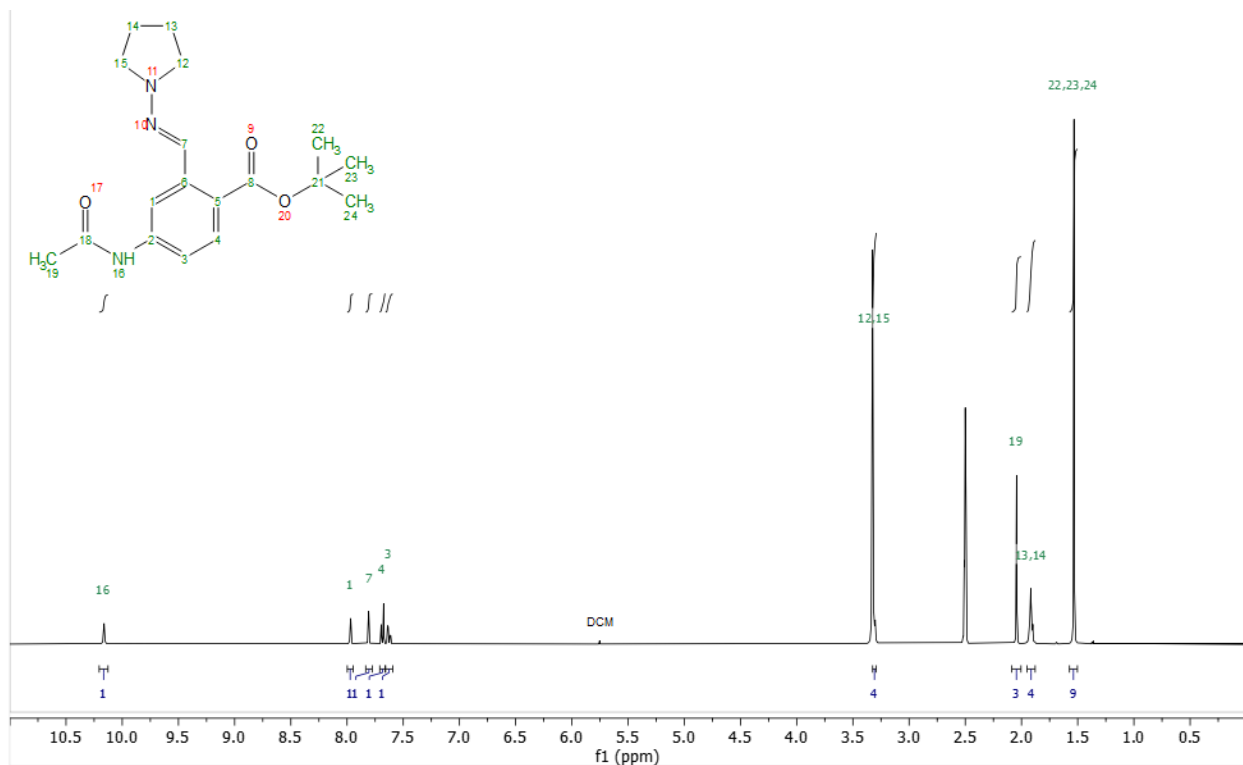

### <sup>13</sup>C-NMR (DMSO-*d*<sub>6</sub>)

<sup>13</sup>C-NMR (101 MHz, DMSO-*d*<sub>6</sub>) δ = 168.73, 166.03, 142.03, 138.10, 131.57, 128.73, 122.72, 116.36, 113.70, 80.64, 50.45, 27.92, 24.07, 23.15

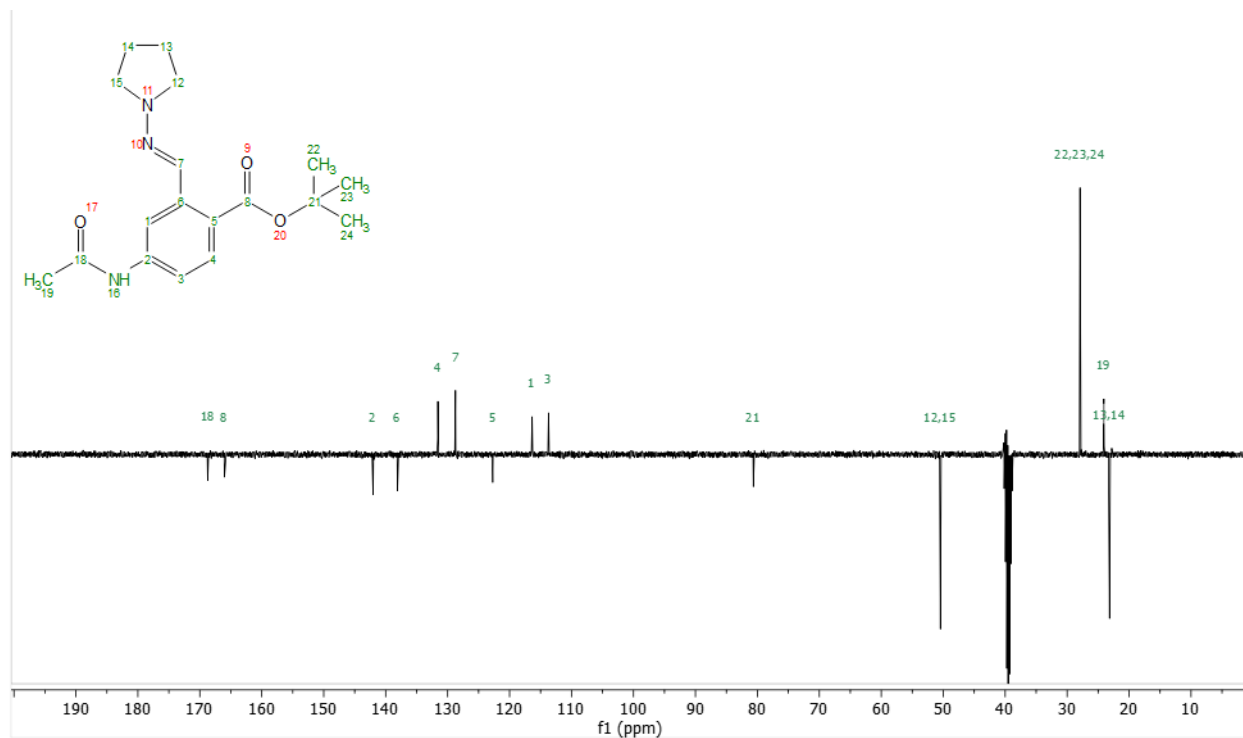

### IR

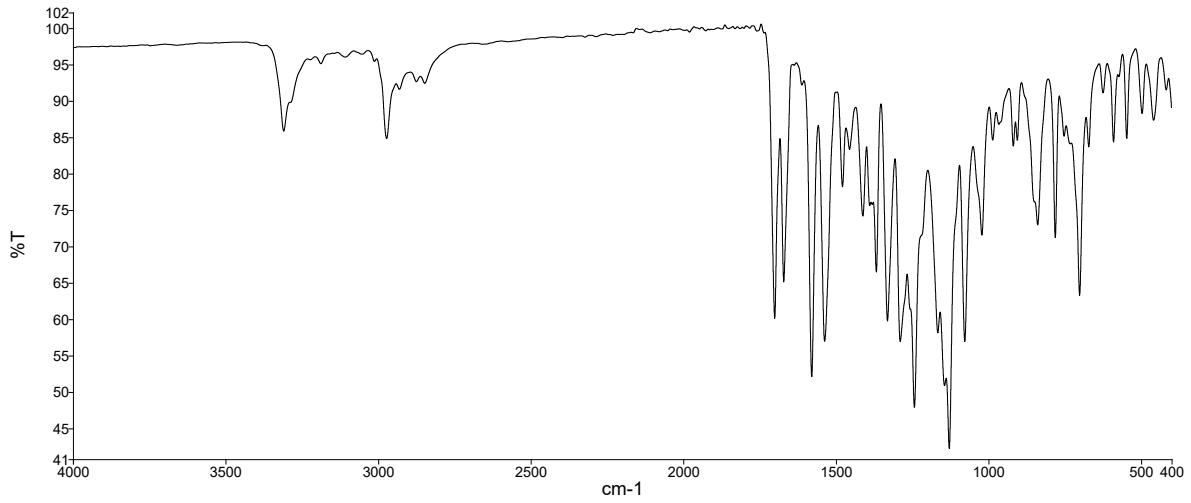

### DSC

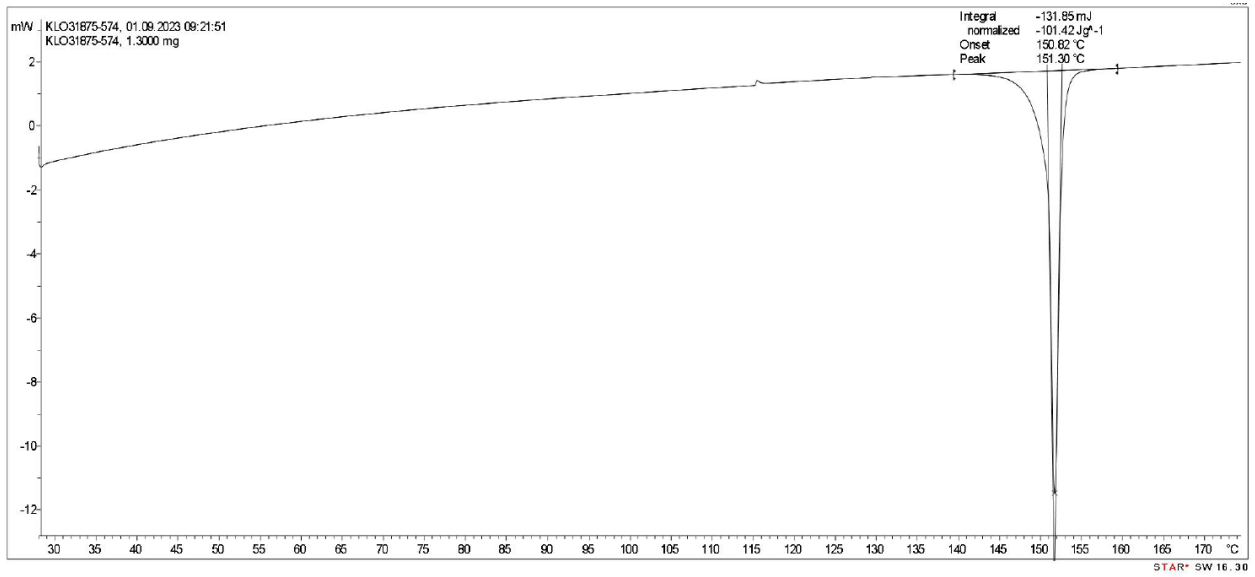

### HRMS

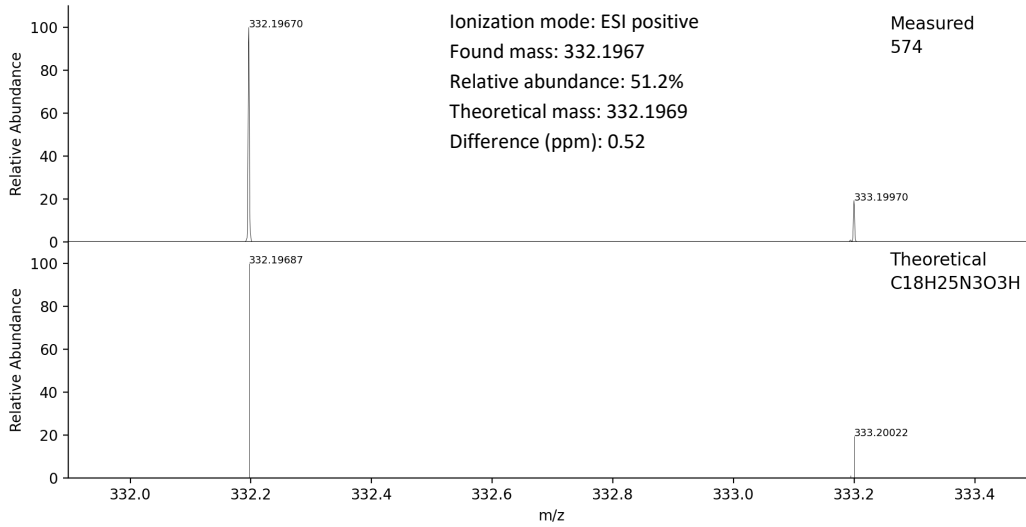

## S42. Spectra of 21

### $^1\text{H-NMR}$ ( $\text{DMSO-}d_6$ )

$^1\text{H-NMR}$  (400 MHz,  $\text{DMSO-}d_6$ )  $\delta$  = 10.32 (s, 1H), 8.08 (d, 1H), 7.77 (d, 1H), 7.73 (dd, 1H), 7.66 (s, 1H), 3.46 – 3.37 (m, 4H), 3.16 (s, 3H), 2.07 (s, 3H), 2.00 – 1.91 (m, 4H)

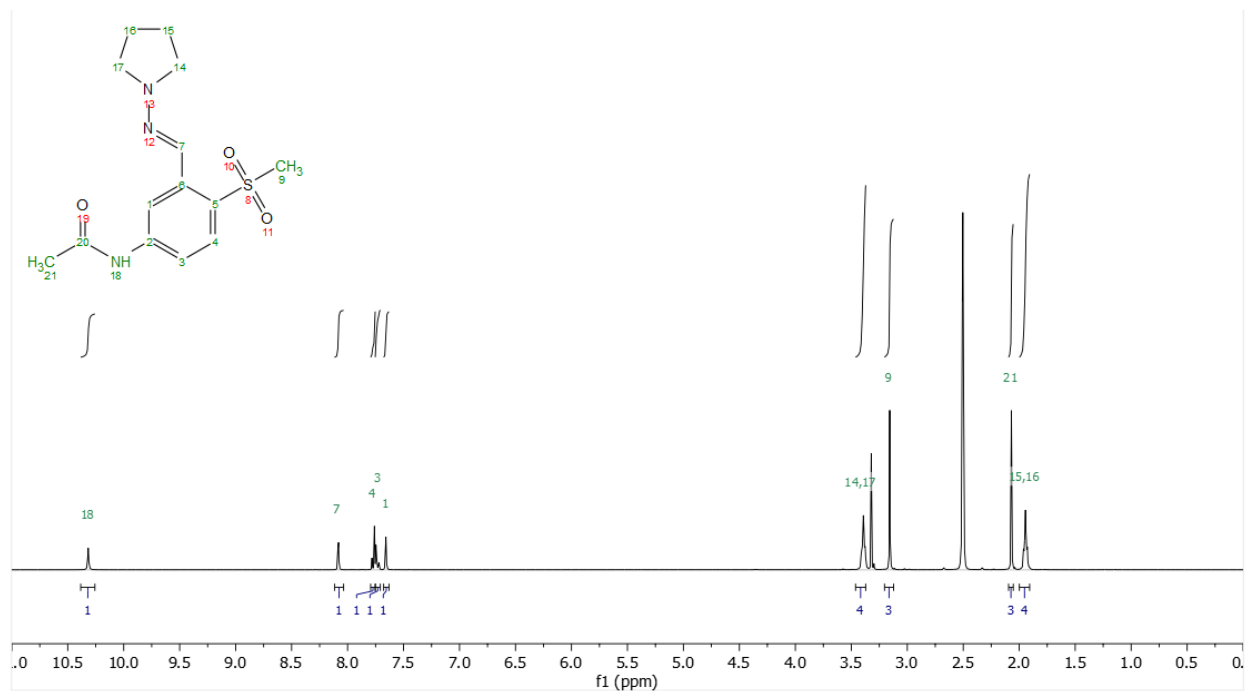

### $^{13}\text{C-NMR}$ ( $\text{DMSO-}d_6$ )

$^{13}\text{C-NMR}$  (101 MHz,  $\text{DMSO-}d_6$ )  $\delta$  = 169.01, 143.46, 136.82, 129.98, 129.50, 124.40, 116.04, 113.79, 50.32, 44.18, 24.11, 23.24

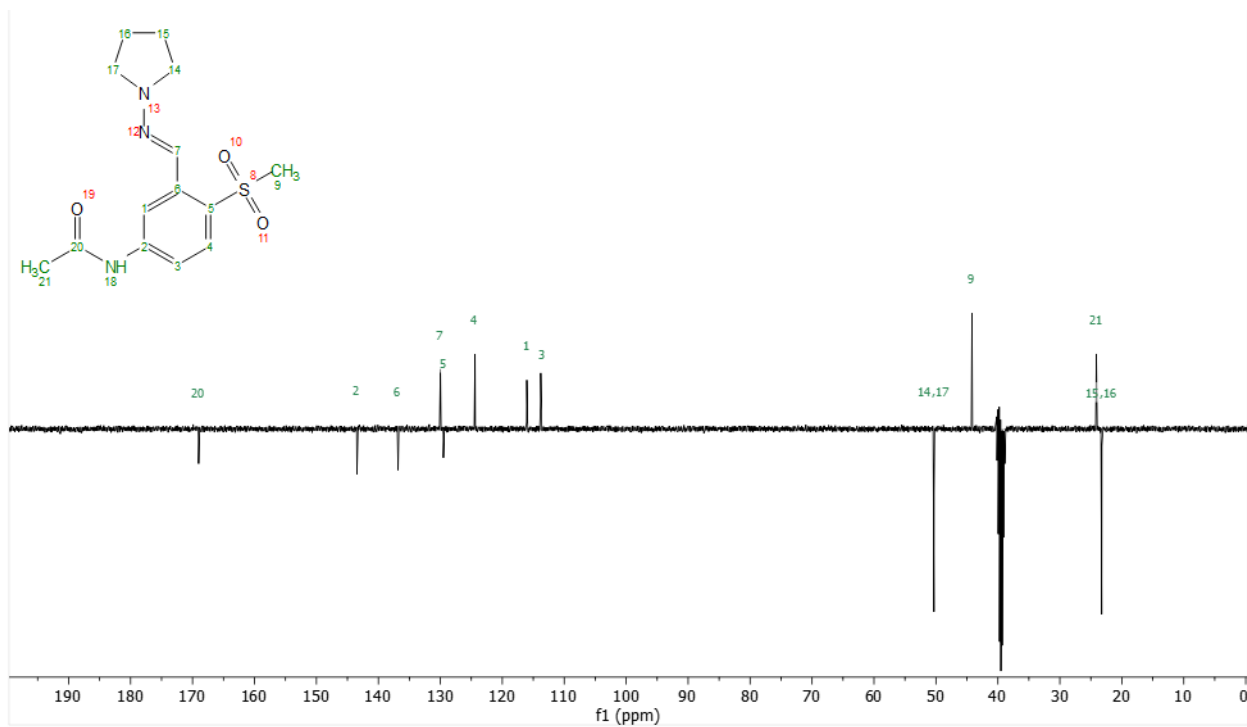

# IR

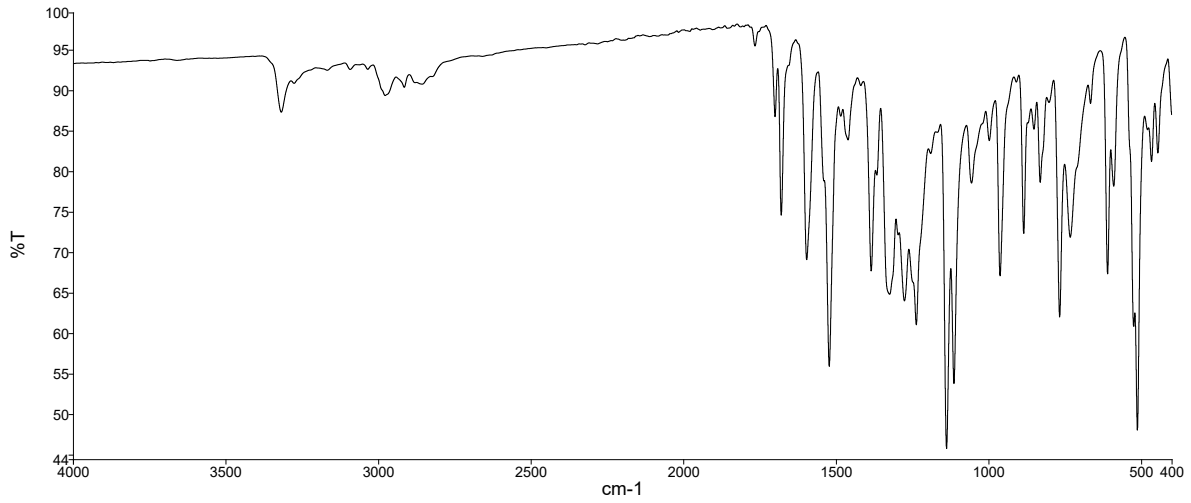

# DSC

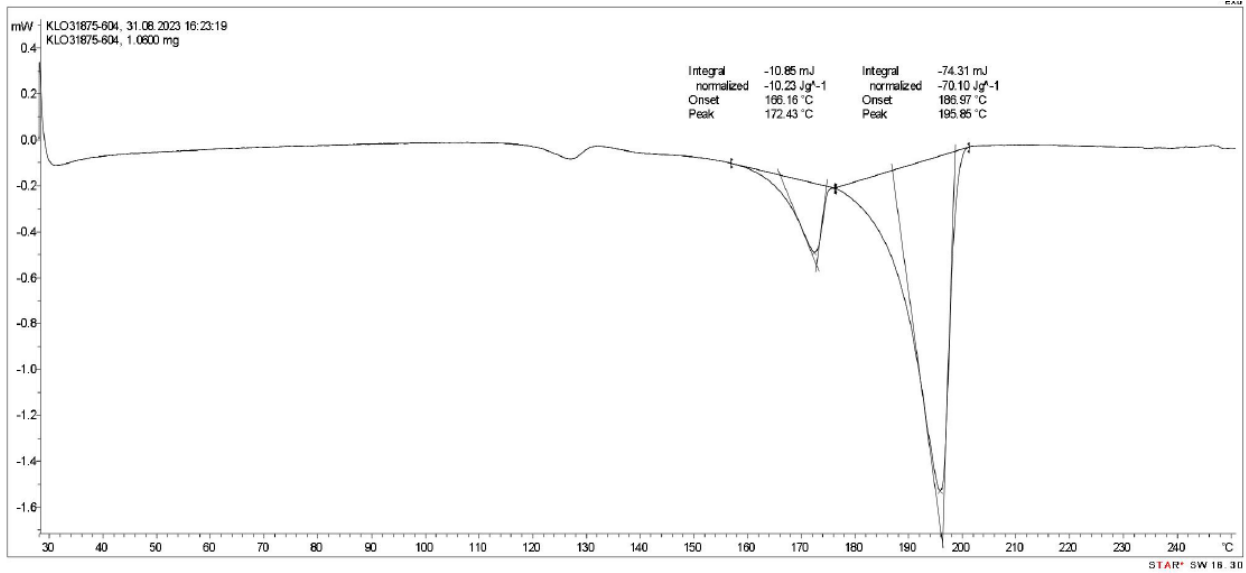

# HRMS

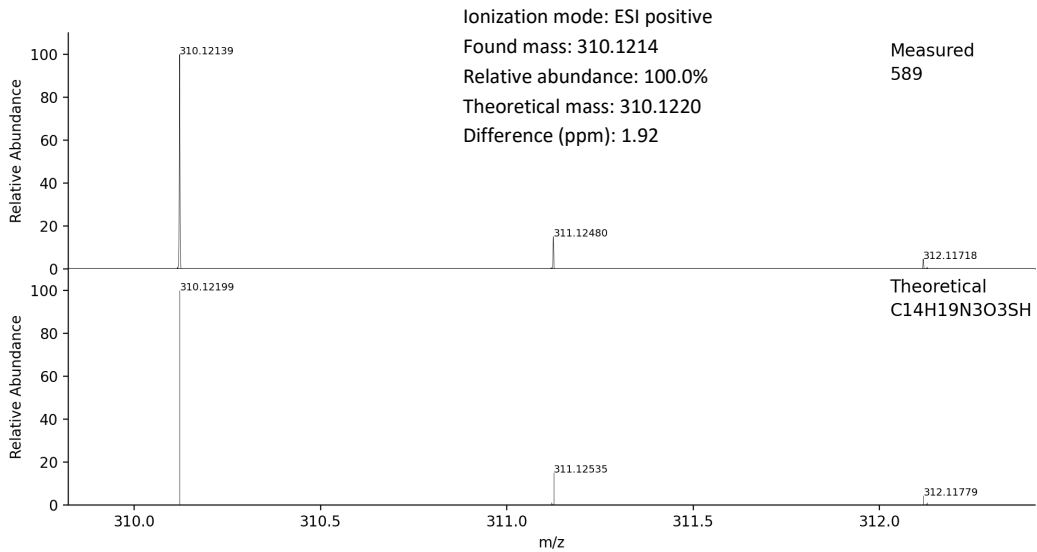

### S43. Spectra of 22

#### $^1\text{H-NMR}$ (DMSO- $d_6$ )

$^1\text{H-NMR}$  (400 MHz, DMSO- $d_6$ )  $\delta$  = 10.18 (s, 1H), 8.03 – 7.98 (m, 1H), 7.68 – 7.66 (m, 1H), 7.67 – 7.61 (m, 1H), 7.57 (s, 1H), 4.10 – 3.88 (m, 4H), 3.32 – 3.28 (m, 4H), 2.05 (s, 3H), 1.96 – 1.87 (m, 4H), 1.21 (t, 6H)

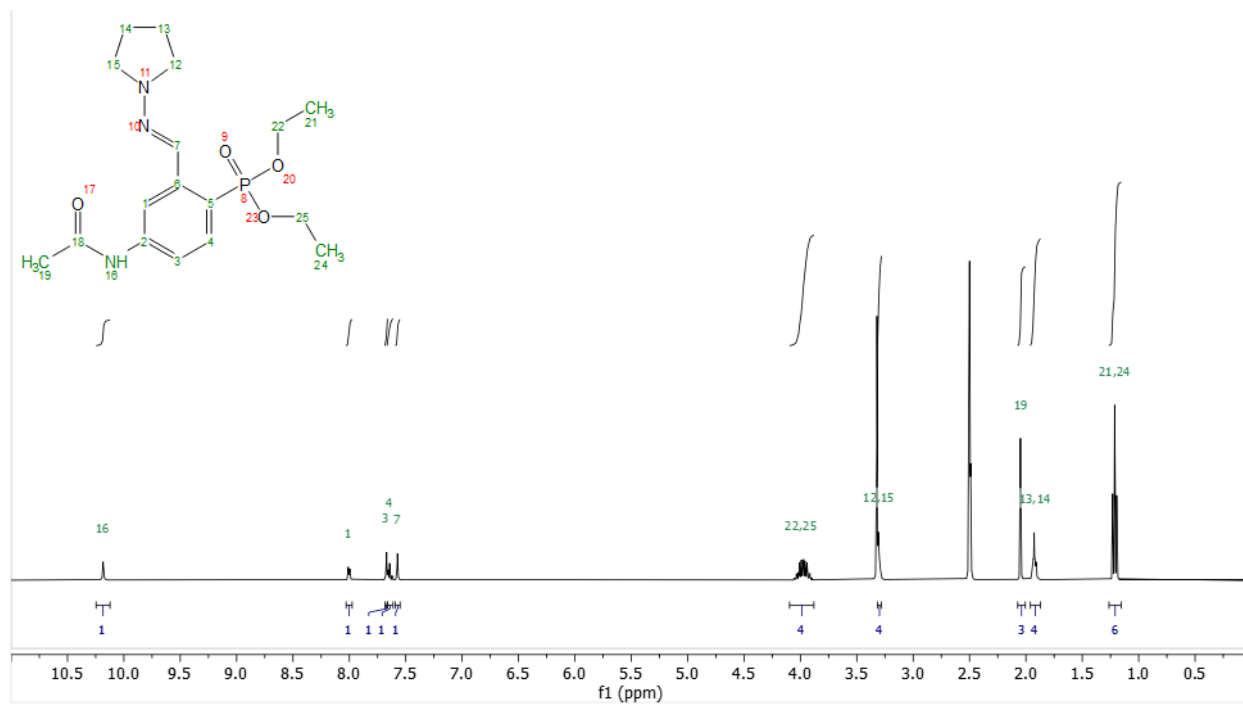

#### $^{13}\text{C-NMR}$ (DMSO- $d_6$ )

$^{13}\text{C-NMR}$  (101 MHz, DMSO- $d_6$ )  $\delta$  = 168.82, 142.78, 140.60 (d), 134.46 (d), 128.35 (d), 117.73 (d), 116.09 (d), 113.12 (d), 61.41 (d), 50.33, 24.07, 23.15, 16.16 (d).

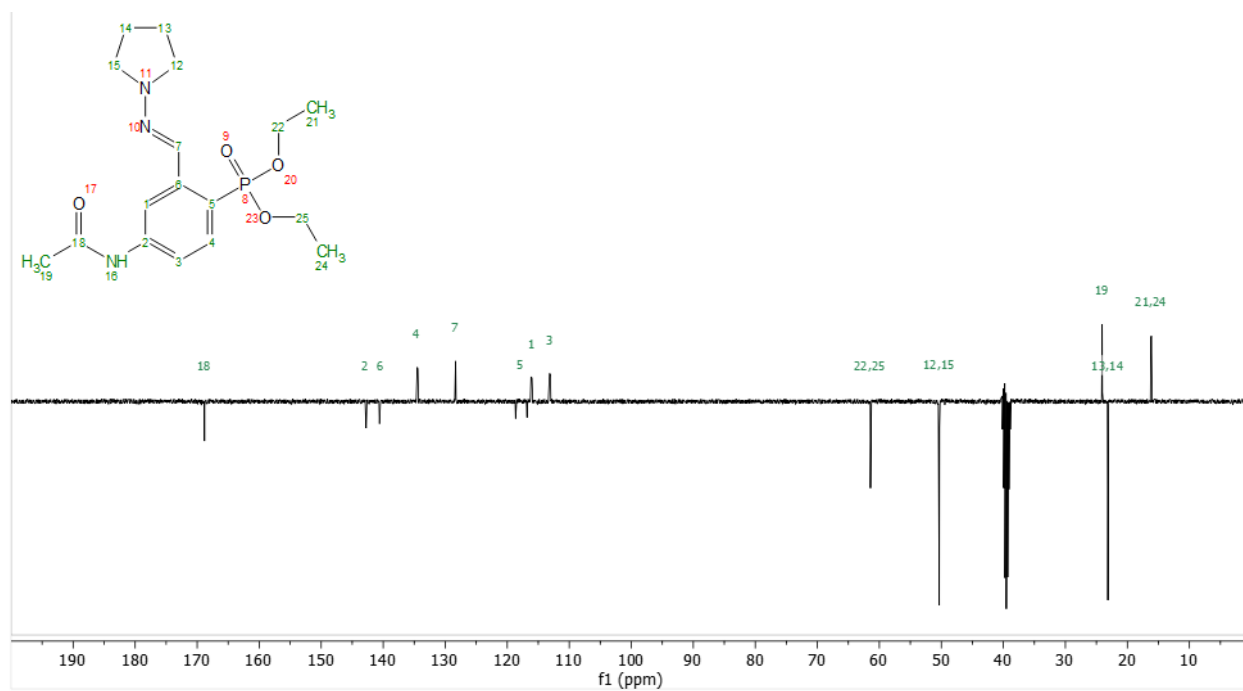



### IR

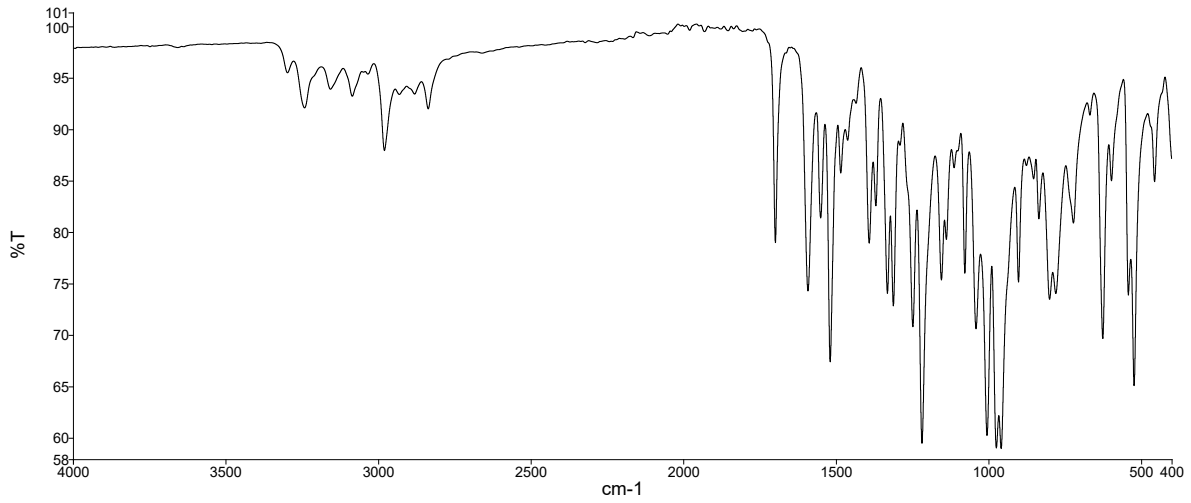

### DSC

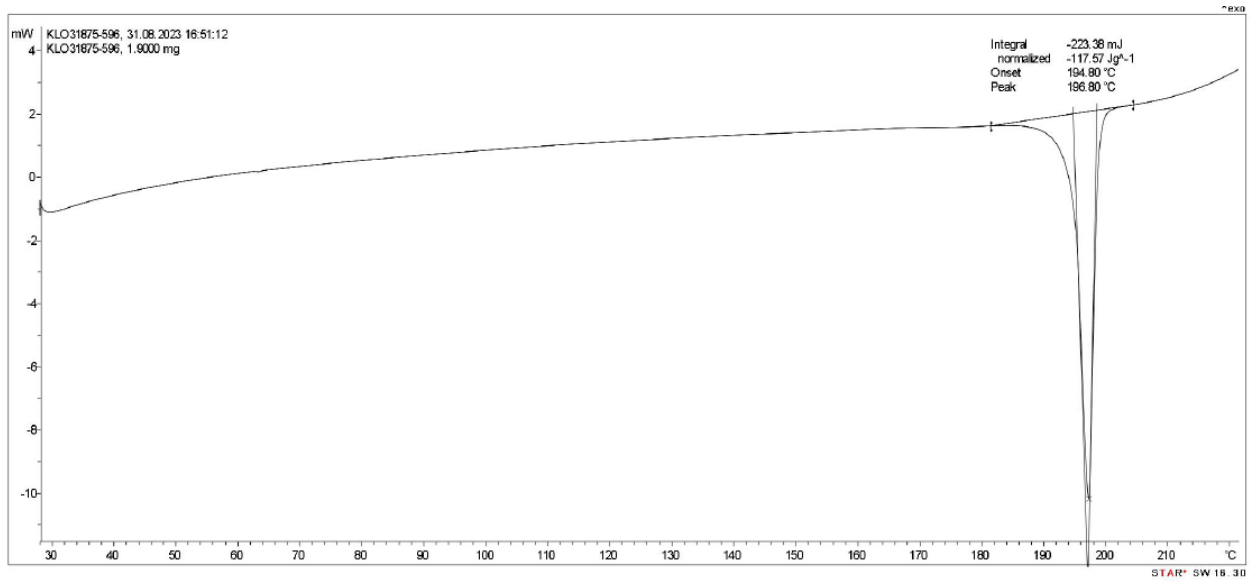

### HRMS

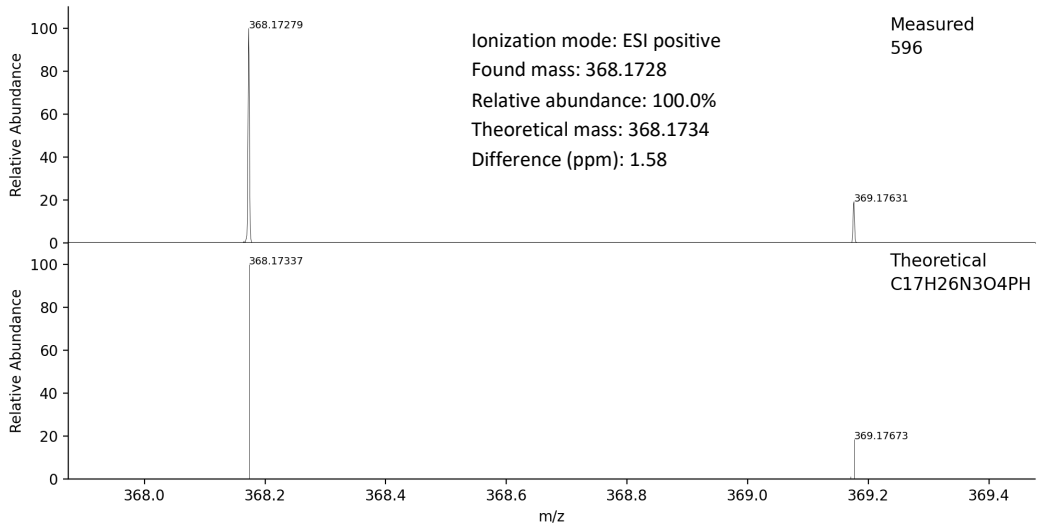

## S44. Spectra of 25

### $^1\text{H-NMR}$ ( $\text{DMSO-}d_6$ )

$^1\text{H-NMR}$  (400 MHz,  $\text{DMSO-}d_6$ )  $\delta = 10.43$  (s, 2H), 8.01 (d, 1H), 7.89 (dd, 1H), 7.85 (d, 1H), 2.09 (s, 3H), 1.55 (s, 9H).

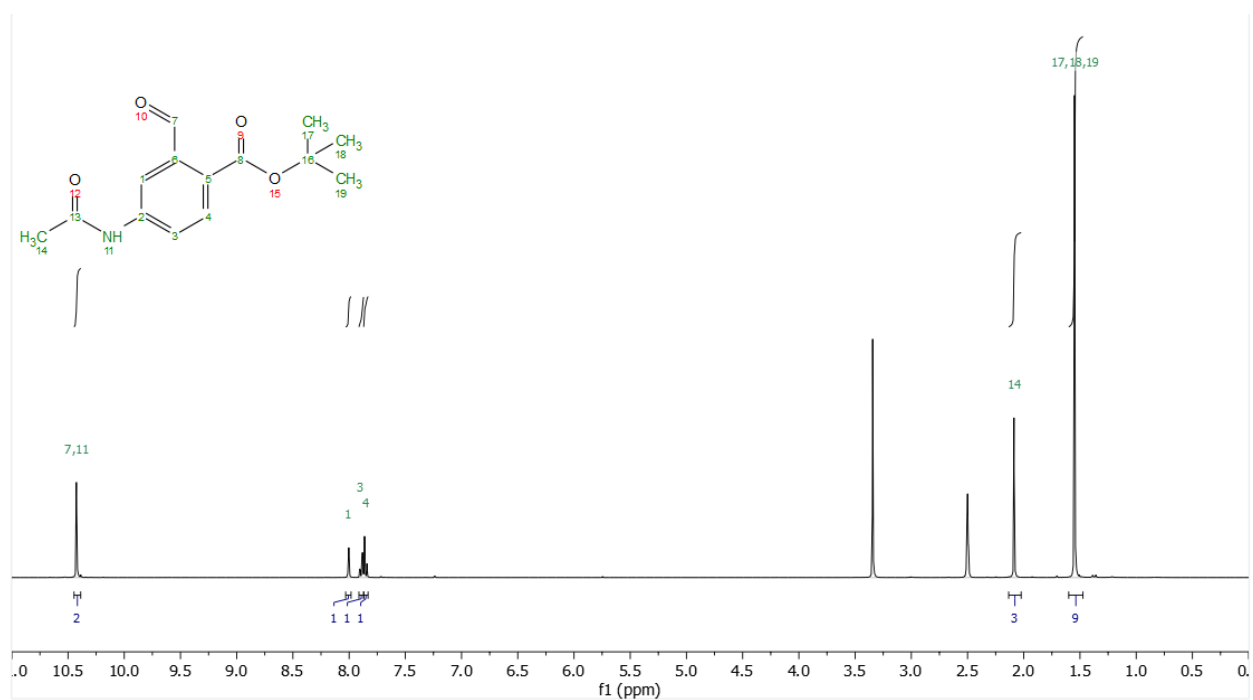

### $^{13}\text{C-NMR}$ ( $\text{DMSO-}d_6$ )

$^{13}\text{C-NMR}$  (101 MHz,  $\text{DMSO-}d_6$ )  $\delta = 192.54, 169.13, 164.69, 142.76, 138.06, 131.35, 127.13, 121.94, 117.21, 82.06, 27.74, 24.13$

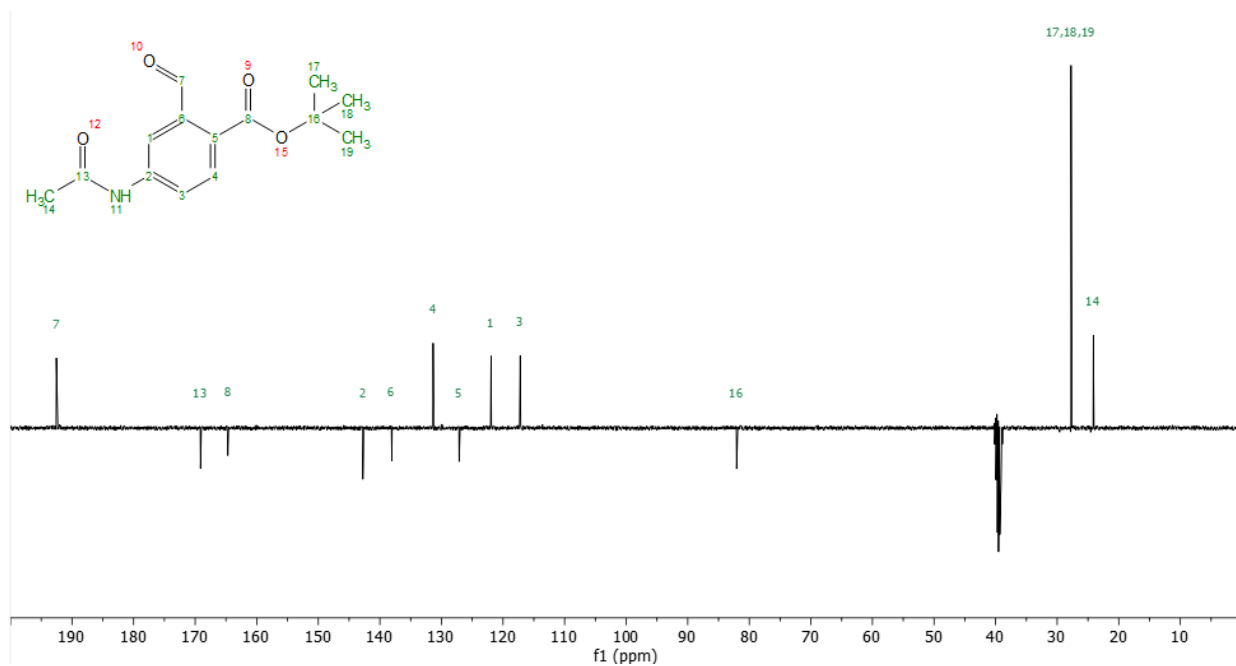

### IR

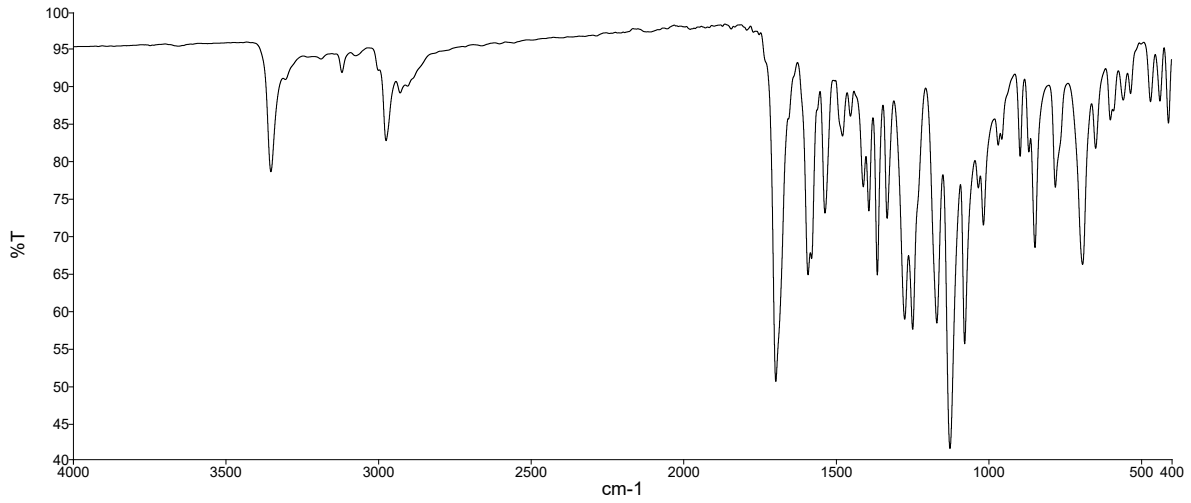

### DSC

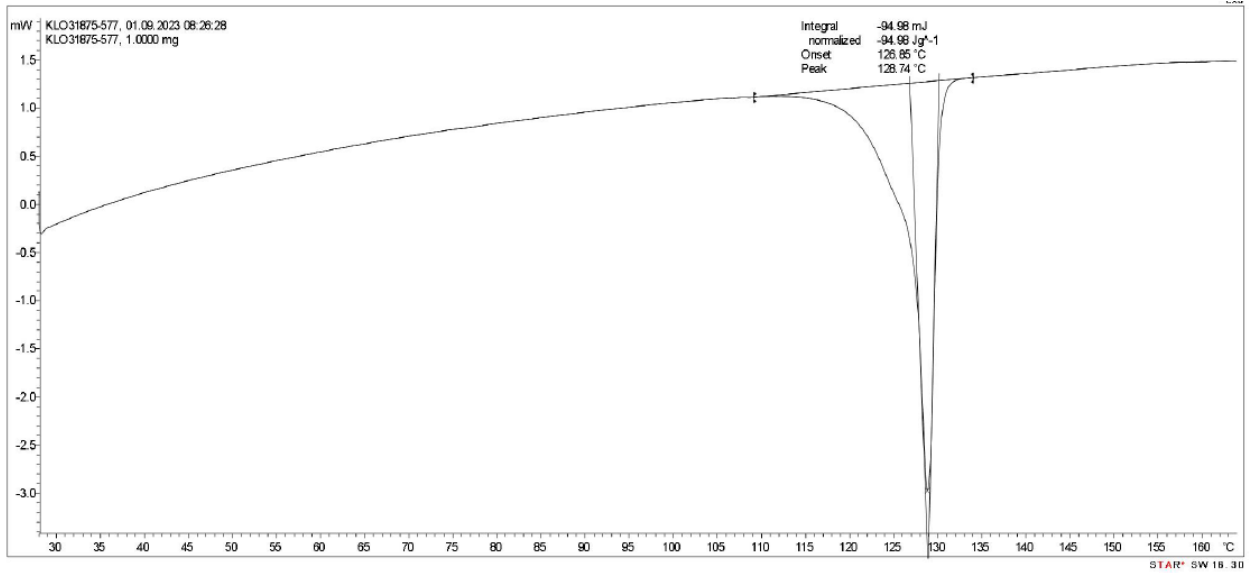

### HRMS

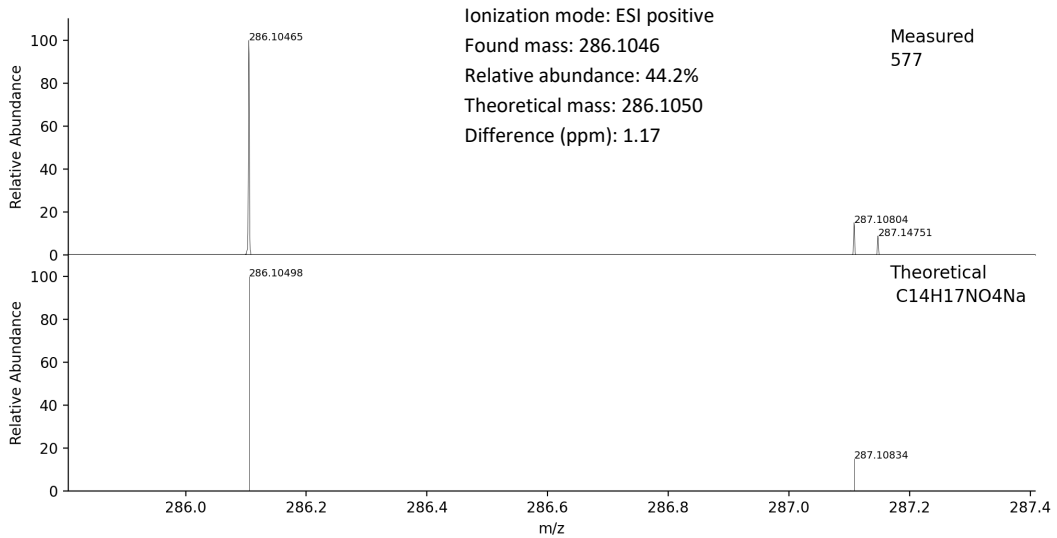

## S45. Spectra of 26

### $^1\text{H-NMR}$ ( $\text{DMSO-}d_6$ )

$^1\text{H-NMR}$  (400 MHz,  $\text{DMSO-}d_6$ )  $\delta$  = 10.55 (s, 1H), 8.18 (d, 1H), 8.00 (d, 1H), 7.84 (dd, 1H), 2.10 (s, 3H), 1.56 (s, 9H)

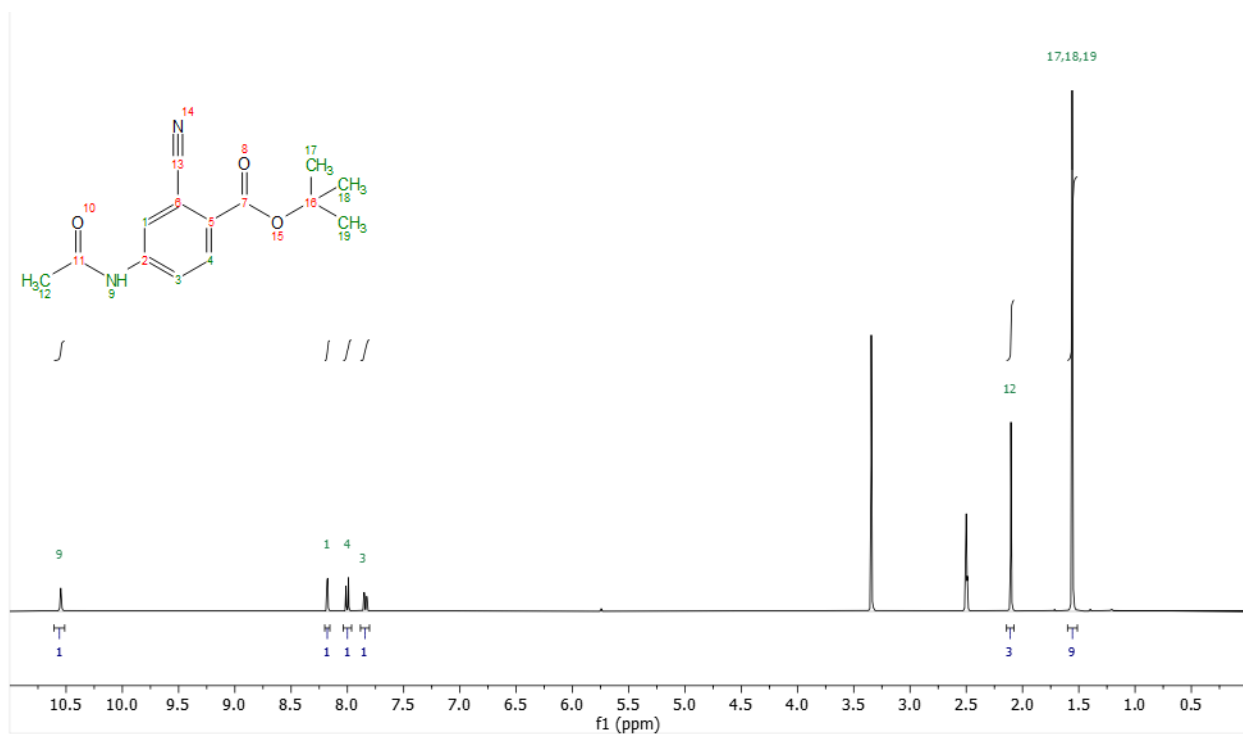

### $^{13}\text{C-NMR}$ ( $\text{DMSO-}d_6$ )

$^{13}\text{C-NMR}$  (101 MHz,  $\text{DMSO-}d_6$ )  $\delta$  = 169.45, 162.43, 143.13, 132.17, 126.76, 123.61, 122.09, 117.55, 112.29, 82.49, 27.65, 24.16

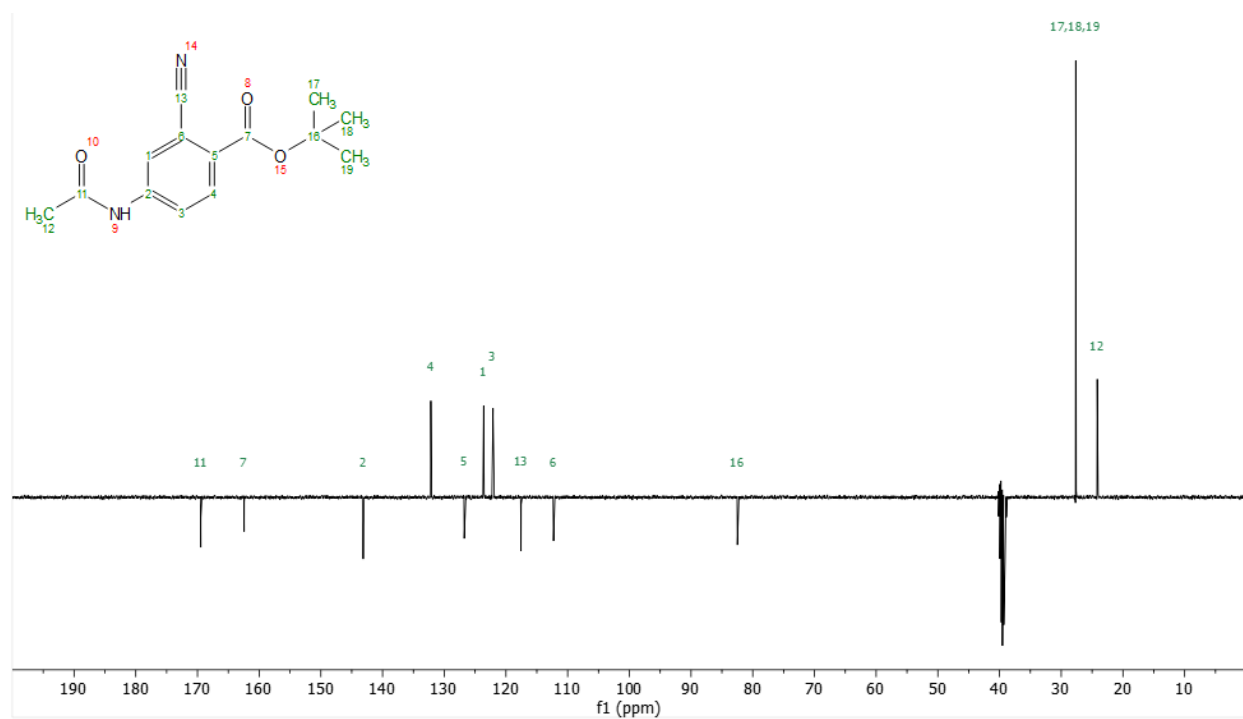

### IR

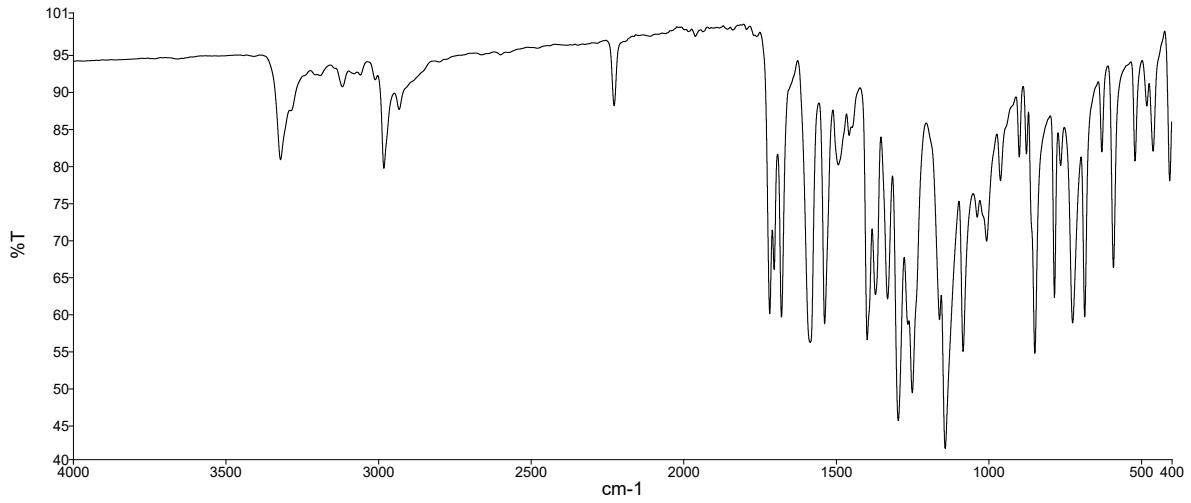

### DSC

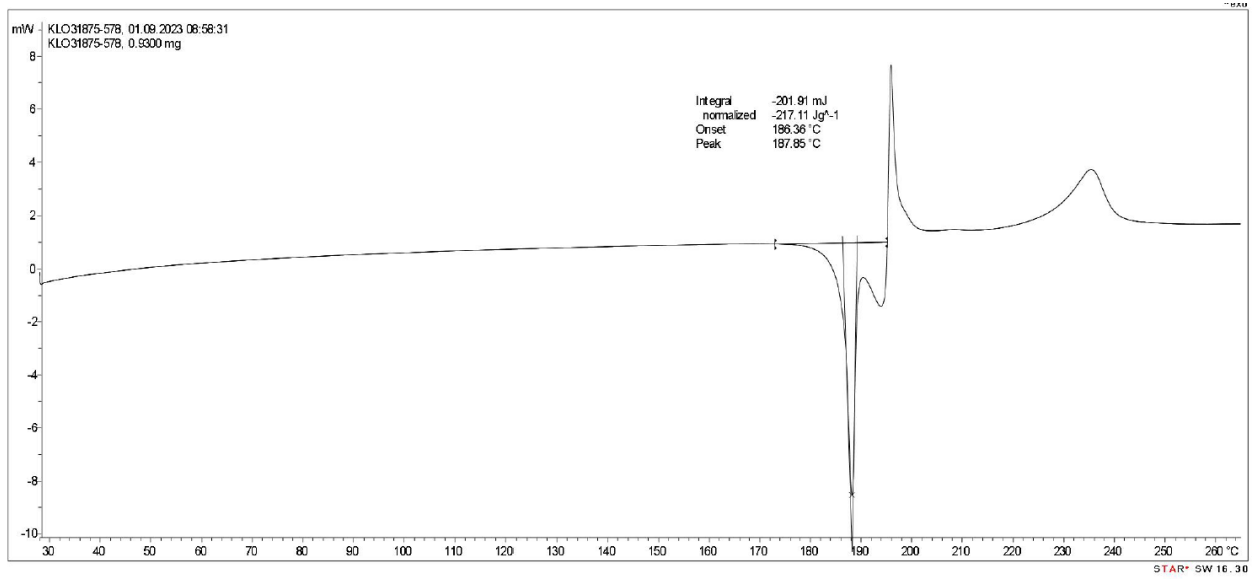

### HRMS

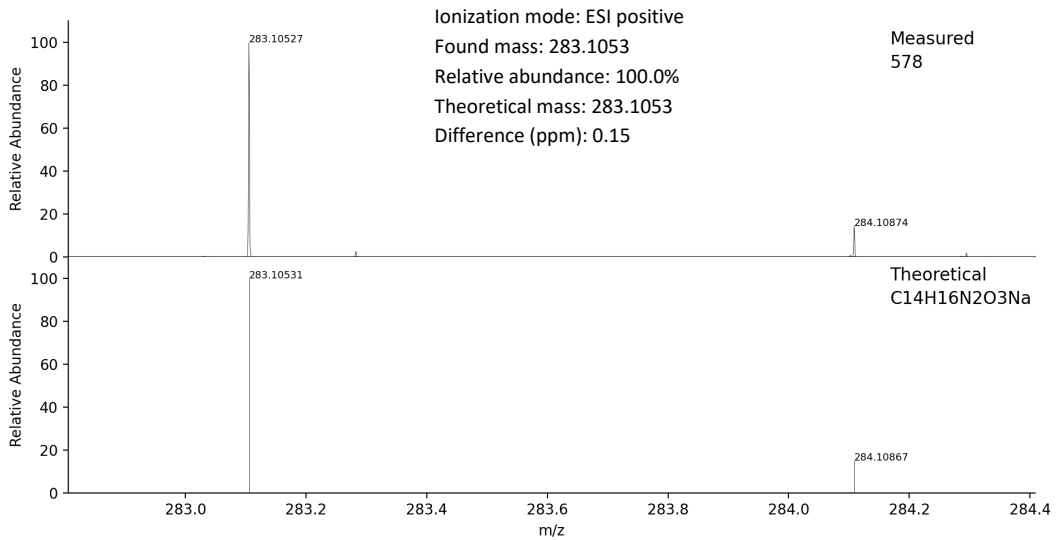

## S46. Spectra of 27

### $^1\text{H-NMR}$ (DMSO- $d_6$ )

$^1\text{H-NMR}$  (400 MHz, DMSO- $d_6$ )  $\delta$  = 10.04 (s, 1H), 7.95 (s, 1H), 6.66 (s, 1H), 2.49 (s, 6H), 2.15 (s, 3H), 2.00 (s, 3H)

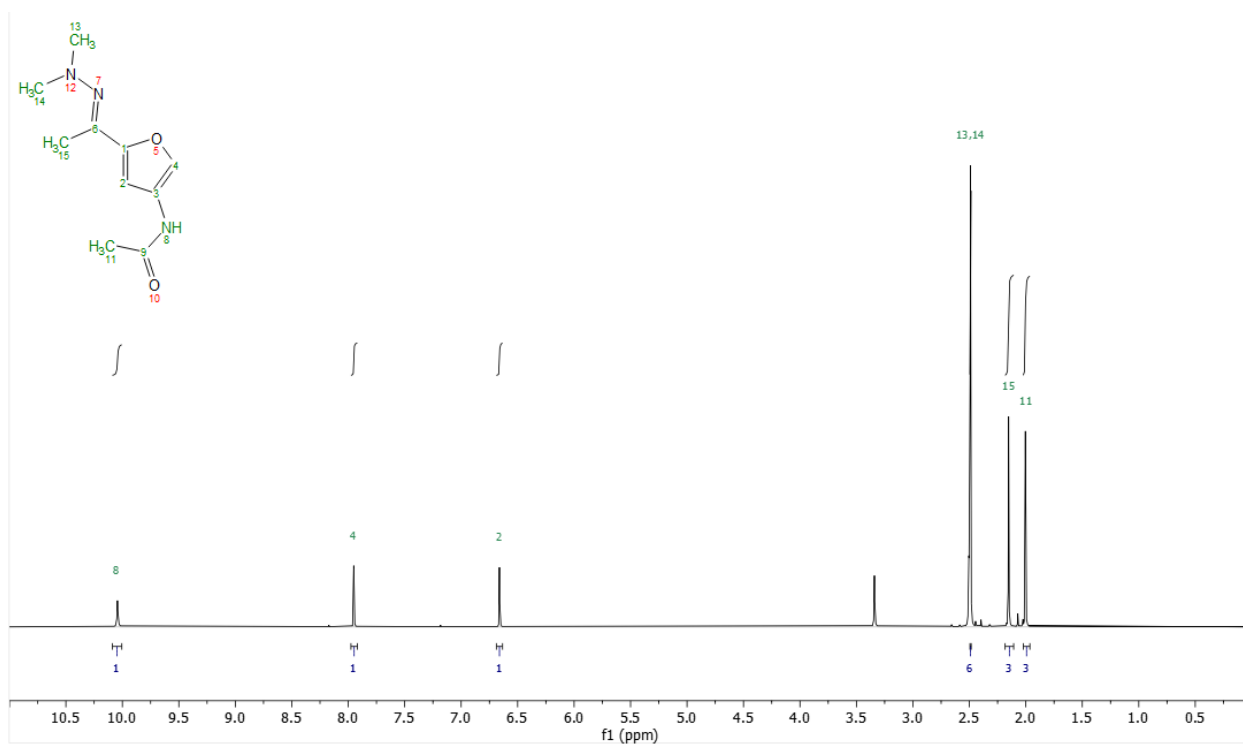

### $^{13}\text{C-NMR}$ (DMSO- $d_6$ )

$^{13}\text{C-NMR}$  (101 MHz, DMSO- $d_6$ )  $\delta$  = 167.30, 151.89, 150.16, 131.80, 126.48, 104.01, 47.01, 22.82, 14.18

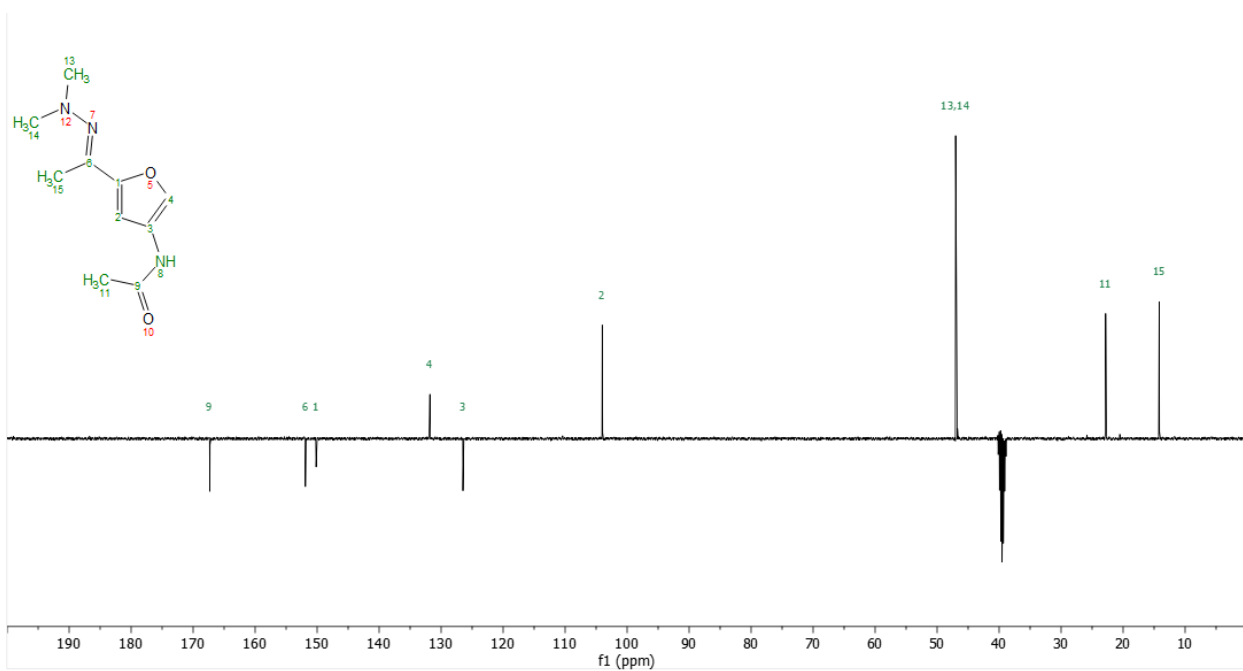

### IR

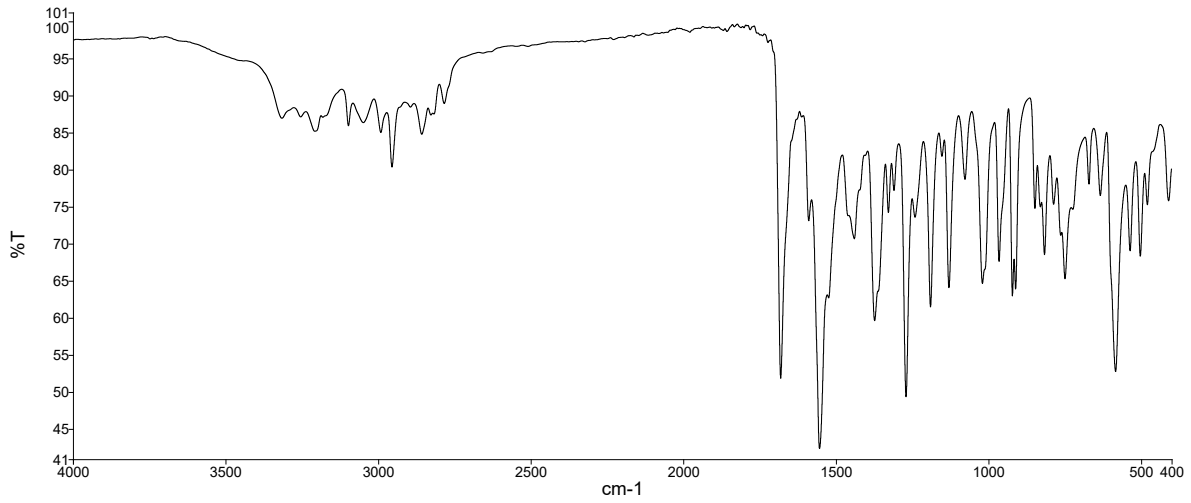

### DSC

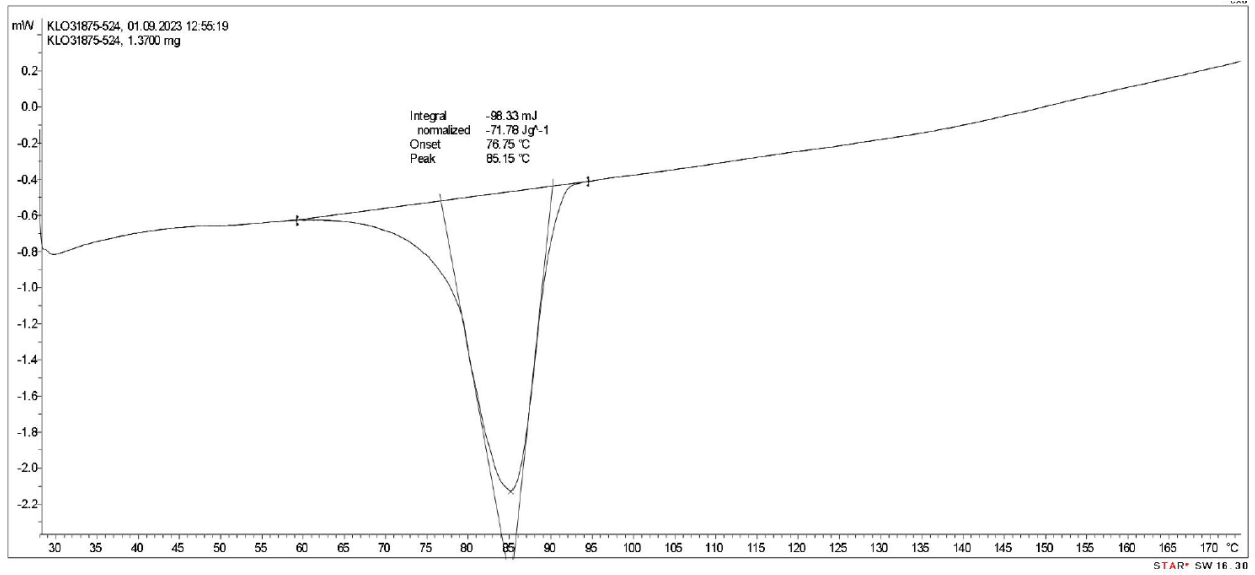

### HRMS

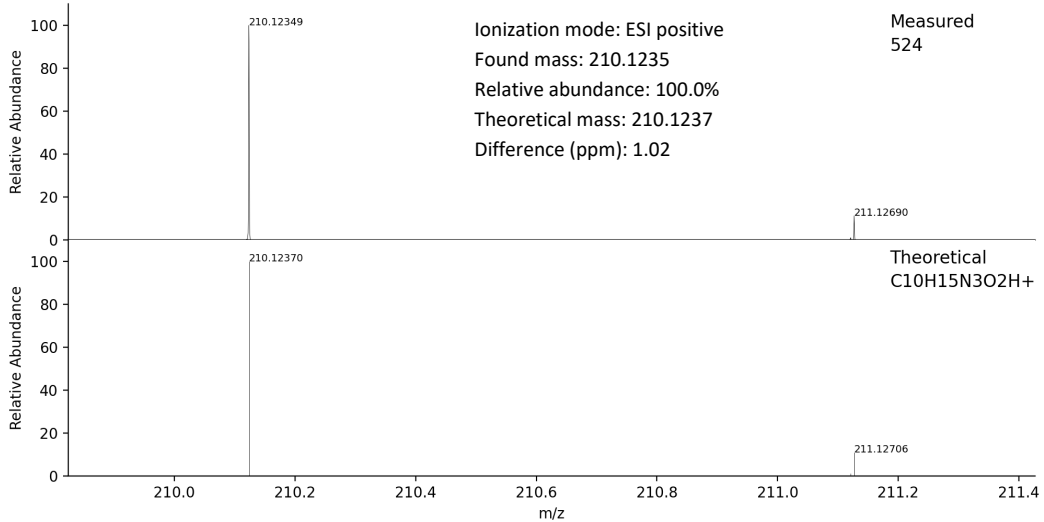

## S47. Spectra of 32

### $^1\text{H-NMR}$ (DMSO- $d_6$ )

$^1\text{H-NMR}$  (400 MHz, DMSO- $d_6$ )  $\delta$  = 10.56 (s, 1H), 8.20 (s, 1H), 8.14 (s, 1H), 7.62 (s, 1H), 7.53 (s, 1H), 2.99 (s, 3H), 2.81 (s, 3H), 2.55 (s, 6H), 2.30 (s, 2H), 2.22 (s, 3H), 2.15 (s, 3H), 2.10 (s, 3H)

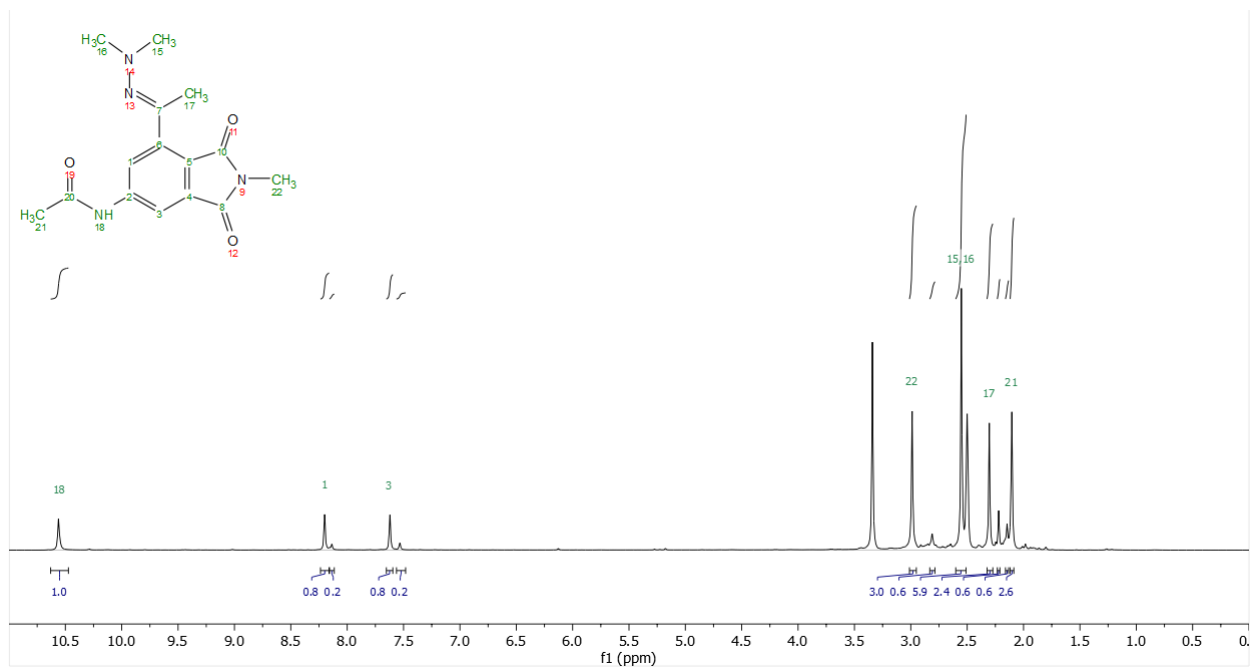

### $^{13}\text{C-NMR}$ (DMSO- $d_6$ )

$^{13}\text{C-NMR}$  (101 MHz, DMSO- $d_6$ )  $\delta$  = 169.36, 167.40, 167.02, 160.42, 144.22, 139.01, 137.46, 134.06, 122.20, 121.79, 120.68, 112.30, 46.66, 24.21, 23.72, 18.93

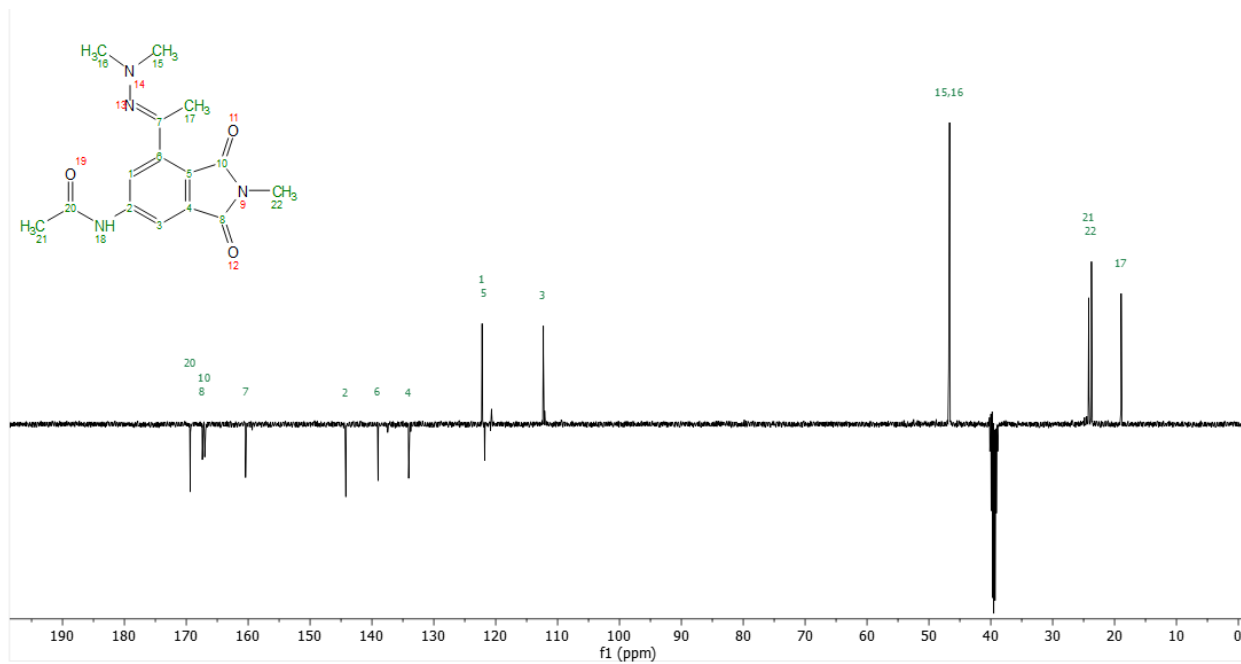



### IR

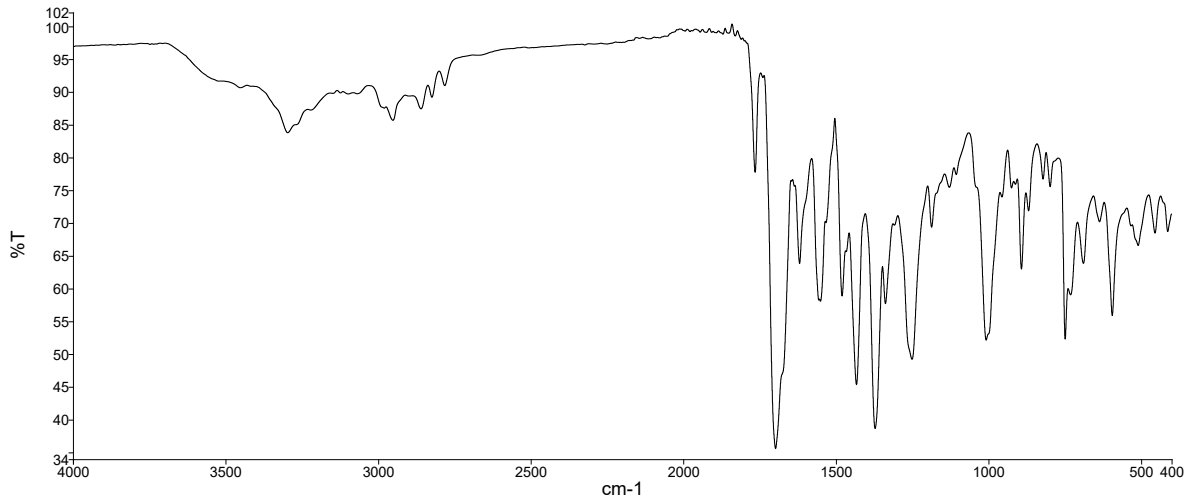

### DSC

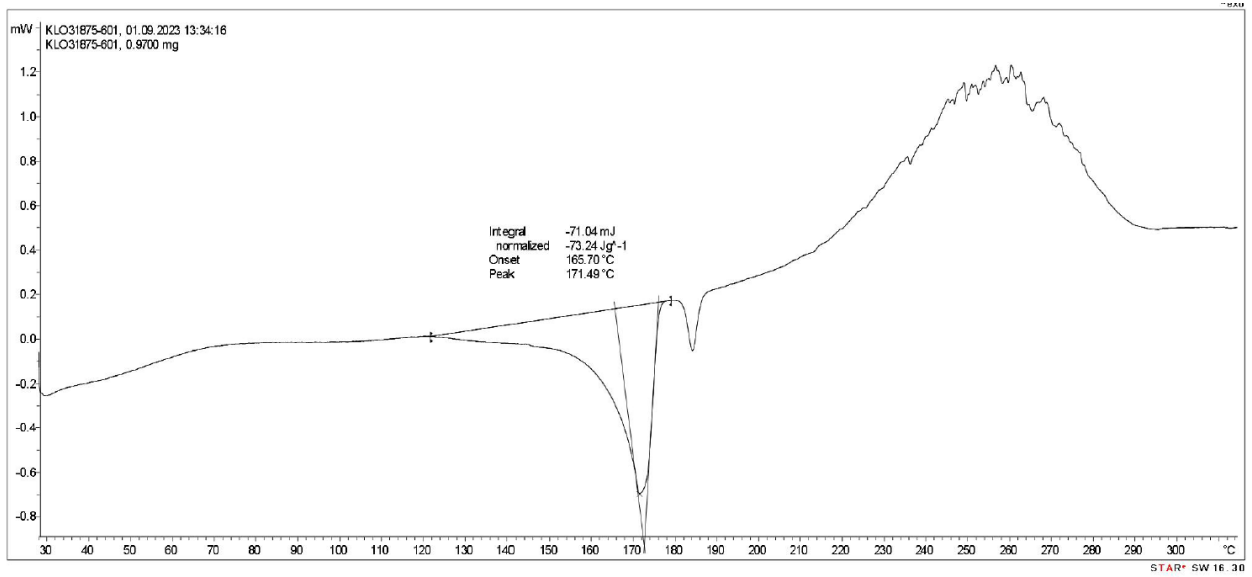

### HRMS

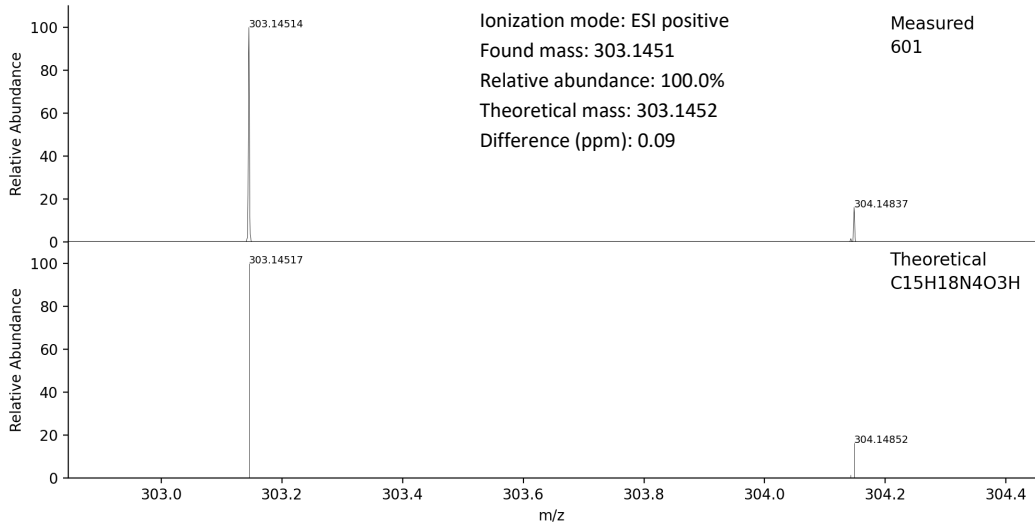

## S48. Spectra of 33

### $^1\text{H-NMR}$ (DMSO- $d_6$ )

$^1\text{H-NMR}$  (400 MHz, DMSO- $d_6$ )  $\delta$  = 10.65 (s, 1H), 8.21 (d, 1H), 7.79 (d, 1H), 3.01 (s, 3H), 2.67 (s, 3H), 2.12 (s, 3H)

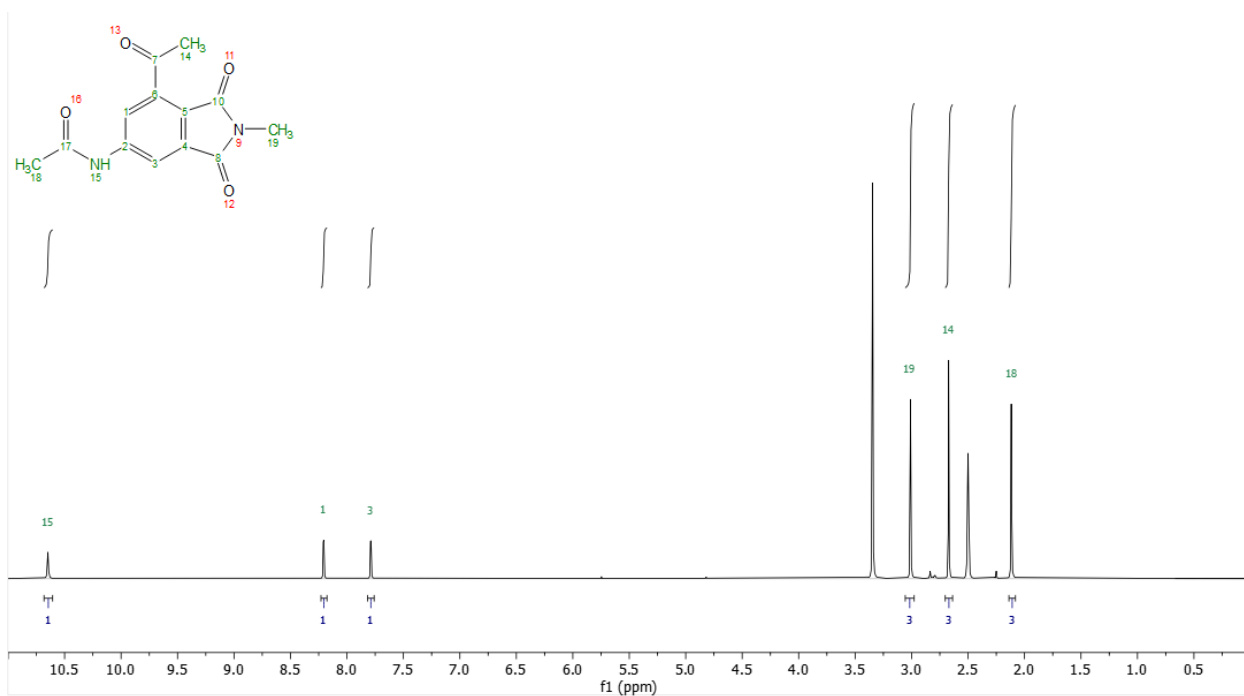

### $^{13}\text{C-NMR}$ (DMSO- $d_6$ )

$^{13}\text{C-NMR}$  (101 MHz, DMSO- $d_6$ )  $\delta$  = 200.74, 169.50, 167.02, 166.80, 144.58, 138.68, 134.07, 121.35, 120.49, 113.88, 30.71, 24.21, 23.88

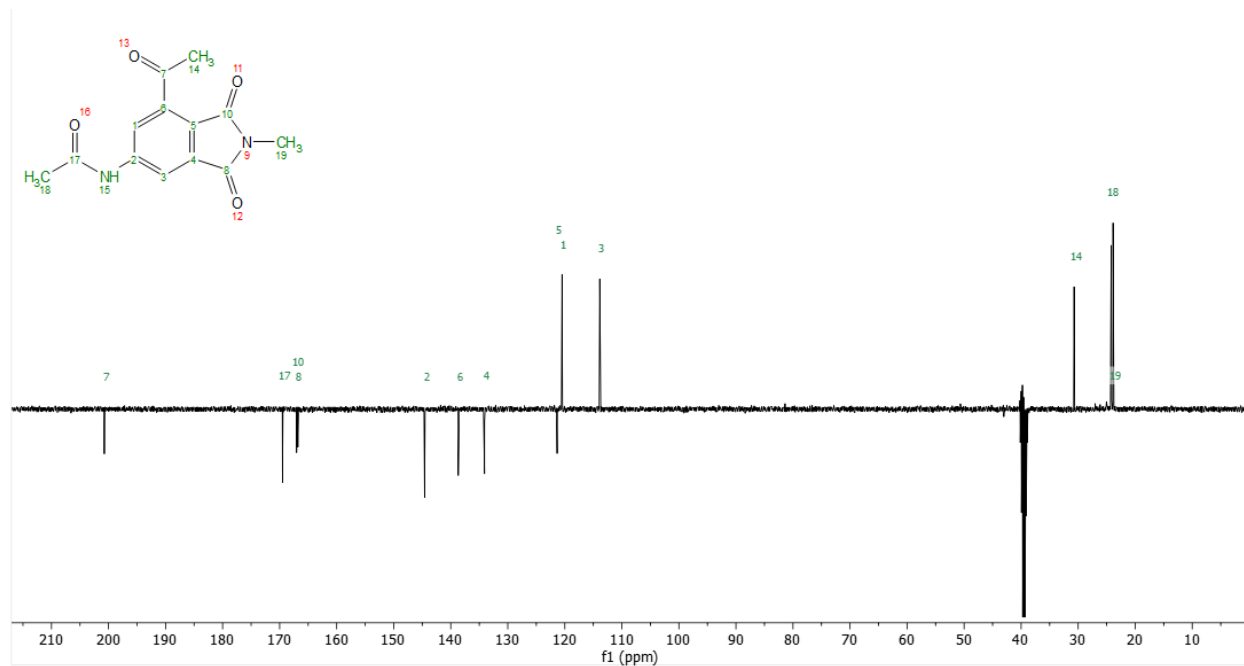

# IR

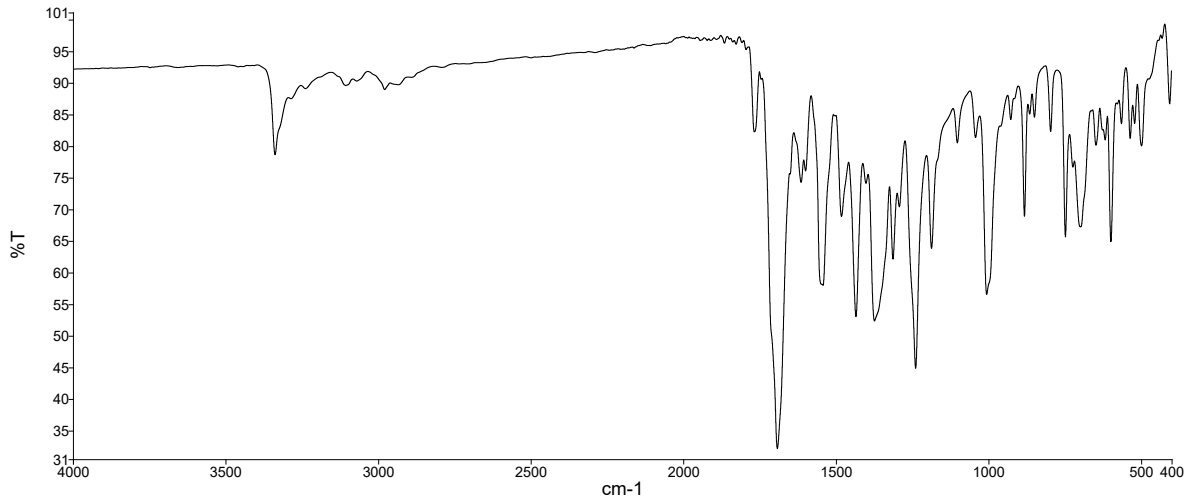

# DSC

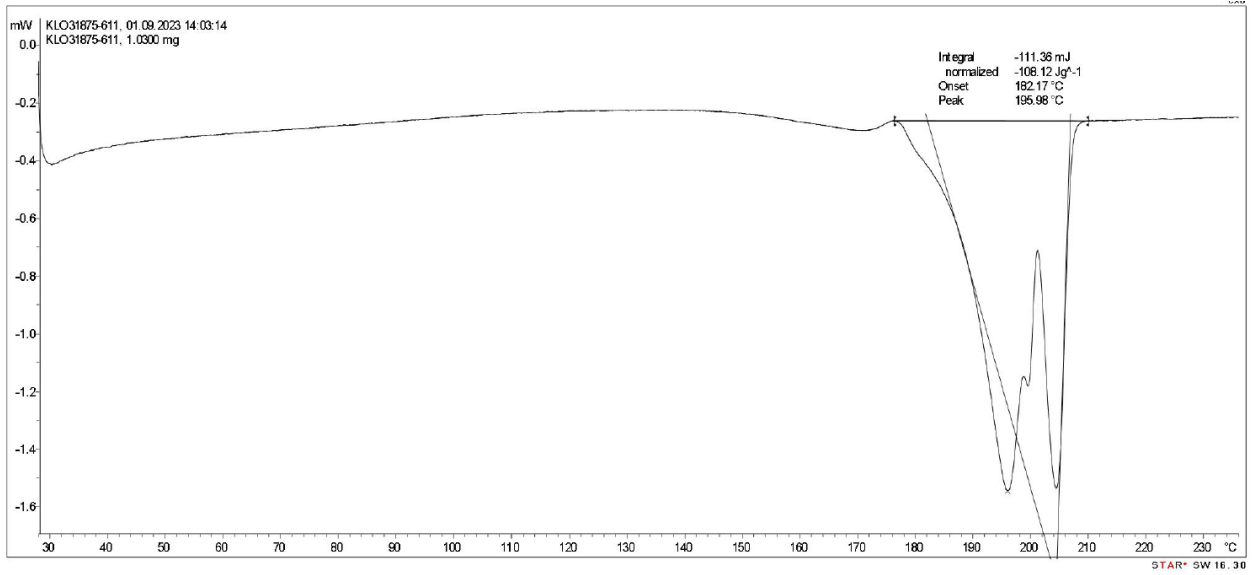

# HRMS

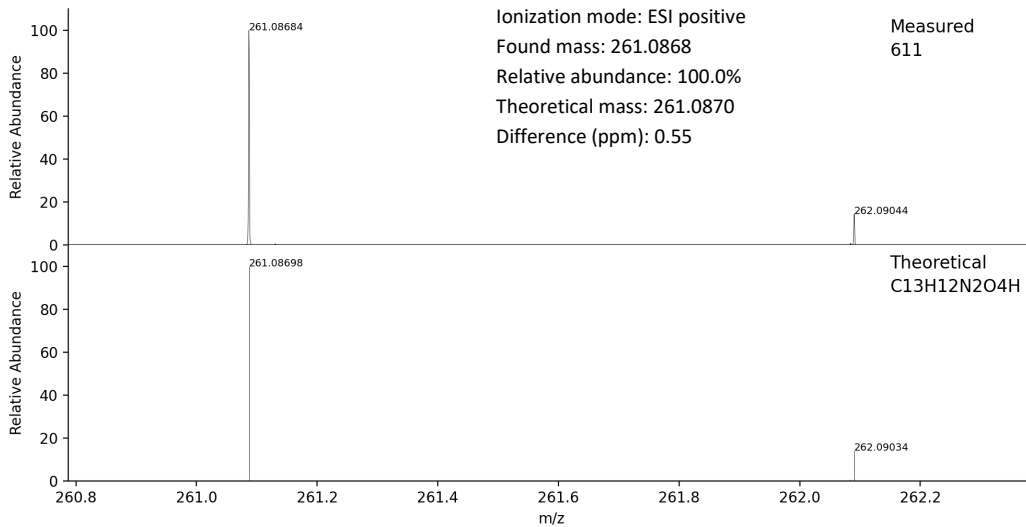

Supplement: d3ob01461d1.pdf [file d3ob01461d1.pdf]
