# Supplementary figures and images for: Substituted anilides from chitin-based 3-acetamido-furfural
Source: Royal Society of Chemistry journal article supplement (doi:10.1039/d3ob01461d), 2023-01-01

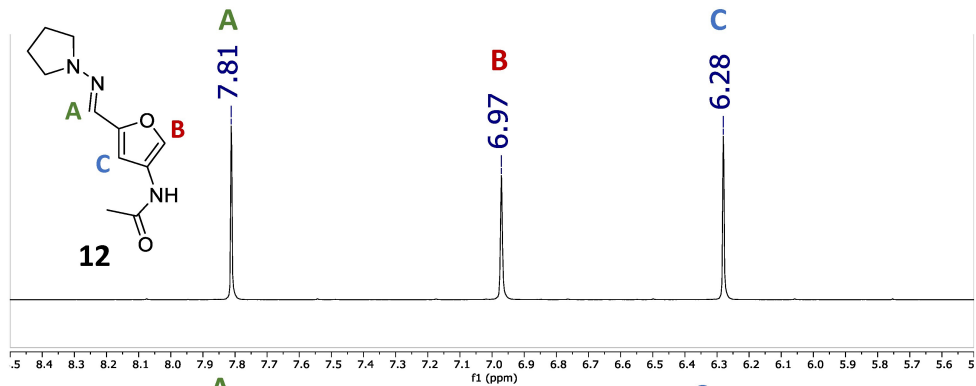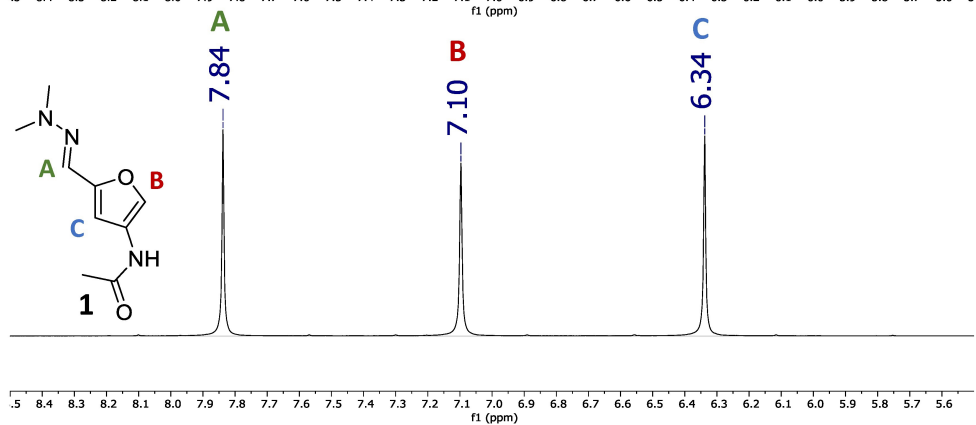

Supplement: d3ob01461d2.pdf [file d3ob01461d2.pdf]

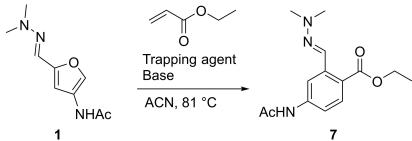

Supplement: d3ob01461d3.pdf [file d3ob01461d3.pdf]

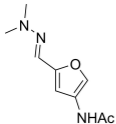

**1**

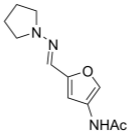

**12**

Supplement: d3ob01461d4.pdf [file d3ob01461d4.pdf]

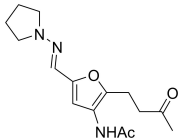

50

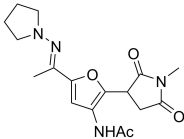

51

Supplement: d3ob01461d5.pdf [file d3ob01461d5.pdf]
